# Supplementary material for: Classification of Asphalt Pavement Cracks Using Laplacian Pyramid-Based Image Processing and a Hybrid Computational Approach
Source: Comput Intell Neurosci. 2018 Oct 1;2018:1312787. doi: 10.1155/2018/1312787 (PMC6188601; doi:10.1155/2018/1312787)
Supplement: Supplementary Materials — The supplementary file contains the dataset used in this study. In this file, the first 100 columns are the input features of the data (which are the projection integrals); the last column is the class labels (1 = alligator crack, 2 = diagonal crack, 3 = longitudinal crack, 4 = noncrack, and 5 = transverse crack). [file 1312787.f1.csv]

PI_1	PI_2	PI_3	PI_4	PI_5	PI_6	PI_7	PI_8	PI_9	PI_10	PI_11	PI_12	PI_13	PI_14	PI_15	PI_16	PI_17	PI_18	PI_19	PI_20	PI_21	PI_22	PI_23	PI_24	PI_25	PI_26	PI_27	PI_28	PI_29	PI_30	PI_31	PI_32	PI_33	PI_34	PI_35	PI_36	PI_37	PI_38	PI_39	PI_40	PI_41	PI_42	PI_43	PI_44	PI_45	PI_46	PI_47	PI_48	PI_49	PI_50
0.074783	0.073913	0.08	0.082609	0.14261	0.19478	0.1513	0.11391	0.096522	0.08087	0.12522	0.17043	0.17043	0.19826	0.16522	0.10609	0.11478	0.17043	0.17043	0.098261	0.069565	0.13043	0.19913	0.1687	0.10783	0.093043	0.16696	0.18348	0.16087	0.19391	0.16	0.073043	0.11391	0.19304	0.18348	0.12522	0.10696	0.11652	0.12783	0.094783	0.056522	0.051304	0.098261	0.14174	0.11652	0.12348	0.17739	0.17217	0.11043	0.07913
0.10545	0.10364	0.09	0.11636	0.20636	0.17636	0.10273	0.091818	0.082727	0.10545	0.14364	0.17545	0.19273	0.15091	0.092727	0.1	0.15091	0.16273	0.11727	0.085455	0.13818	0.22909	0.20545	0.13182	0.090909	0.12455	0.11545	0.19273	0.19818	0.094545	0.098182	0.18909	0.19	0.12818	0.11545	0.12727	0.11	0.089091	0.066364	0.042727	0.083636	0.14636	0.14	0.13182	0.18636	0.19455	0.14091	0.11364	0.10545	0.092727
0.070833	0.073333	0.080833	0.074167	0.12917	0.19417	0.15583	0.1175	0.10083	0.084167	0.12417	0.16417	0.16333	0.19083	0.16417	0.10917	0.1125	0.155	0.15833	0.099167	0.075	0.13667	0.1925	0.15417	0.095	0.075	0.155	0.19	0.155	0.18	0.16667	0.08	0.1	0.18083	0.18083	0.12167	0.10917	0.12167	0.12667	0.10333	0.060833	0.041667	0.078333	0.13	0.12083	0.11667	0.16583	0.17667	0.1225	0.084167
0.081667	0.080833	0.089167	0.0775	0.12333	0.18	0.13583	0.096667	0.09	0.084167	0.11917	0.15167	0.15	0.18083	0.15333	0.091667	0.1025	0.15583	0.15167	0.09	0.068333	0.12083	0.18583	0.16417	0.10333	0.10583	0.13333	0.14417	0.17833	0.1475	0.083333	0.135	0.18917	0.16083	0.11667	0.1	0.11833	0.115	0.081667	0.050833	0.044167	0.081667	0.12917	0.11083	0.11917	0.16167	0.16583	0.1275	0.1025	0.095833
0.0832	0.0992	0.096	0.0776	0.1592	0.1792	0.1008	0.0792	0.0808	0.096	0.1416	0.1616	0.1488	0.1584	0.1184	0.0776	0.1192	0.1592	0.1192	0.068	0.092	0.1632	0.1768	0.1256	0.0896	0.096	0.1144	0.1504	0.1888	0.1432	0.0856	0.1464	0.1888	0.1376	0.1016	0.1	0.1128	0.1104	0.0688	0.0416	0.0576	0.1072	0.1288	0.1008	0.1312	0.1728	0.1544	0.1112	0.0936	0.0888
0.036923	0.095385	0.17538	0.15385	0.075385	0.078462	0.1	0.090769	0.095385	0.12462	0.15692	0.15231	0.12923	0.14462	0.14308	0.18462	0.21692	0.15077	0.15385	0.19538	0.17538	0.18462	0.16462	0.13077	0.11846	0.11385	0.13077	0.14923	0.15077	0.16308	0.17846	0.18923	0.14615	0.084615	0.098462	0.19385	0.21385	0.17231	0.14462	0.095385	0.092308	0.13385	0.19692	0.15692	0.061538	0.073846	0.11077	0.13231	0.13077	0.10462
0.0725	0.12875	0.10625	0.06375	0.07	0.08	0.0825	0.08375	0.10875	0.1325	0.12125	0.10875	0.1075	0.1225	0.15375	0.1525	0.1275	0.14875	0.16	0.13875	0.15125	0.135	0.11625	0.12	0.095	0.09	0.10375	0.10875	0.1075	0.12875	0.13625	0.1575	0.16	0.10625	0.07125	0.10875	0.185	0.2175	0.1925	0.1275	0.06625	0.06375	0.13125	0.16375	0.10625	0.05375	0.07125	0.095	0.11375	0.10625
0.015714	0.051429	0.11571	0.16857	0.13143	0.07	0.078571	0.092857	0.097143	0.1	0.12143	0.14857	0.14571	0.13429	0.13714	0.14429	0.16571	0.19	0.14857	0.15857	0.19714	0.16857	0.16571	0.15	0.11429	0.11	0.11571	0.11571	0.11	0.13143	0.13571	0.16	0.14143	0.078571	0.078571	0.13286	0.20143	0.23143	0.19429	0.12857	0.078571	0.09	0.18571	0.18	0.084286	0.074286	0.11571	0.13	0.13286	0.11429
0.018824	0.049412	0.11882	0.14824	0.088235	0.049412	0.068235	0.082353	0.069412	0.072941	0.10353	0.11882	0.11529	0.11294	0.1	0.11412	0.14588	0.14941	0.12941	0.12118	0.13529	0.13765	0.13059	0.10588	0.082353	0.084706	0.089412	0.10588	0.10706	0.11176	0.13647	0.13647	0.084706	0.049412	0.069412	0.13529	0.16	0.13882	0.11529	0.072941	0.068235	0.10941	0.15412	0.11294	0.045882	0.068235	0.1	0.11529	0.10235	0.076471
0.028571	0.078571	0.16429	0.16429	0.084286	0.077143	0.10143	0.088571	0.09	0.10857	0.12857	0.14	0.13714	0.14143	0.12	0.14429	0.18143	0.15286	0.16	0.17429	0.16143	0.17	0.15429	0.12143	0.10429	0.13	0.14143	0.13429	0.14714	0.15857	0.17	0.15	0.091429	0.061429	0.1	0.19714	0.18857	0.12	0.11	0.08	0.094286	0.16571	0.17429	0.10429	0.068571	0.1	0.12143	0.12571	0.10714	0.08
0.095556	0.10222	0.086667	0.074444	0.091111	0.093333	0.085556	0.10667	0.12111	0.13778	0.12556	0.10222	0.10444	0.098889	0.086667	0.081111	0.10222	0.11667	0.11	0.13	0.13778	0.13667	0.17667	0.14333	0.078889	0.071111	0.086667	0.14889	0.14333	0.077778	0.055556	0.075556	0.10111	0.12222	0.11	0.063333	0.043333	0.046667	0.06	0.087778	0.088889	0.074444	0.057778	0.067778	0.16556	0.31333	0.31667	0.17222	0.081111	0.052222
0.065	0.057	0.078	0.085	0.077	0.07	0.081	0.1	0.114	0.11	0.114	0.119	0.102	0.089	0.078	0.09	0.116	0.122	0.11	0.122	0.121	0.093	0.113	0.132	0.092	0.104	0.097	0.071	0.068	0.116	0.138	0.094	0.057	0.056	0.067	0.102	0.103	0.074	0.053	0.039	0.06	0.087	0.082	0.06	0.044	0.045	0.113	0.252	0.293	0.147
0.070526	0.083158	0.085263	0.089474	0.084211	0.076842	0.08	0.083158	0.10211	0.12737	0.12421	0.11895	0.12421	0.12105	0.10421	0.093684	0.092632	0.10947	0.11789	0.11895	0.13158	0.12105	0.10632	0.13474	0.10842	0.10211	0.08	0.071579	0.094737	0.16211	0.14737	0.072632	0.053684	0.071579	0.10526	0.11474	0.082105	0.054737	0.049474	0.050526	0.062105	0.070526	0.072632	0.065263	0.043158	0.051579	0.17158	0.30947	0.24737	0.1
0.081818	0.086364	0.077273	0.070909	0.076364	0.074545	0.075455	0.096364	0.10091	0.11091	0.10182	0.082727	0.085455	0.083636	0.073636	0.080909	0.099091	0.1	0.10455	0.12182	0.11091	0.10636	0.14273	0.11	0.063636	0.093636	0.068182	0.080909	0.11182	0.10818	0.068182	0.044545	0.057273	0.086364	0.1	0.086364	0.056364	0.034545	0.04	0.051818	0.070909	0.069091	0.059091	0.05	0.058182	0.12091	0.27818	0.27636	0.11182	0.065455
0.082105	0.095789	0.088421	0.076842	0.087368	0.088421	0.088421	0.12	0.12105	0.12	0.11684	0.093684	0.084211	0.089474	0.084211	0.10316	0.13158	0.12105	0.11684	0.12947	0.11263	0.11474	0.16105	0.12211	0.069474	0.095789	0.08	0.085263	0.11579	0.14	0.10105	0.056842	0.06	0.08	0.10316	0.11053	0.076842	0.044211	0.042105	0.044211	0.074737	0.083158	0.068421	0.063158	0.051579	0.091579	0.26947	0.34211	0.19474	0.087368
0.024286	0.068571	0.10714	0.12143	0.1	0.074286	0.072857	0.075714	0.078571	0.088571	0.12286	0.13286	0.11429	0.12429	0.10571	0.15286	0.20286	0.15429	0.17286	0.23286	0.24	0.22	0.19429	0.14286	0.10429	0.1	0.10429	0.082857	0.094286	0.13143	0.12714	0.13286	0.13429	0.12571	0.14571	0.15429	0.17	0.18	0.14714	0.088571	0.064286	0.10714	0.21571	0.19857	0.10429	0.085714	0.10857	0.18857	0.18429	0.097143
0.02	0.052	0.078667	0.108	0.10533	0.068	0.066667	0.073333	0.073333	0.085333	0.104	0.10667	0.096	0.089333	0.094667	0.13333	0.18667	0.18667	0.144	0.18667	0.228	0.19067	0.17733	0.14267	0.097333	0.086667	0.057333	0.085333	0.12267	0.116	0.12133	0.12133	0.11733	0.12933	0.12933	0.156	0.13867	0.090667	0.073333	0.062667	0.104	0.17333	0.17867	0.12133	0.069333	0.077333	0.172	0.17733	0.088	0.072
0.00875	0.04	0.08375	0.11375	0.0975	0.06	0.0575	0.06625	0.07	0.0775	0.0975	0.1025	0.09	0.09625	0.095	0.13375	0.175	0.15125	0.145	0.18375	0.19125	0.17125	0.16375	0.12375	0.08875	0.075	0.05125	0.08375	0.11625	0.1075	0.1075	0.09875	0.0925	0.11875	0.12875	0.14375	0.12625	0.0875	0.07	0.06	0.1	0.16375	0.165	0.1125	0.0725	0.085	0.17375	0.17	0.075	0.05625
0.021429	0.042857	0.062857	0.078571	0.10714	0.10571	0.08	0.071429	0.072857	0.068571	0.082857	0.11429	0.12286	0.13714	0.12714	0.10571	0.12571	0.2	0.20429	0.14857	0.19429	0.25857	0.22143	0.18143	0.13286	0.091429	0.1	0.08	0.084286	0.11714	0.12286	0.13	0.12286	0.11571	0.11714	0.11714	0.15571	0.18571	0.15857	0.092857	0.06	0.085714	0.17429	0.19571	0.13143	0.088571	0.091429	0.16857	0.19714	0.11857
0.02	0.04	0.067692	0.093846	0.13538	0.12	0.066154	0.061538	0.076923	0.073846	0.090769	0.12	0.12	0.13077	0.13692	0.13692	0.15385	0.20923	0.20615	0.15846	0.2	0.23077	0.19385	0.19846	0.16154	0.078462	0.090769	0.12769	0.13077	0.13692	0.13385	0.12923	0.12769	0.13538	0.17538	0.16769	0.10615	0.073846	0.069231	0.084615	0.17846	0.20462	0.14	0.092308	0.089231	0.16308	0.20923	0.13692	0.052308	0.075385
0.042667	0.085333	0.096	0.061333	0.062667	0.082667	0.096	0.108	0.10133	0.092	0.097333	0.11333	0.12	0.13333	0.13467	0.12267	0.11067	0.12267	0.144	0.13467	0.124	0.124	0.14533	0.18533	0.13867	0.081333	0.090667	0.13867	0.14933	0.13467	0.112	0.094667	0.10933	0.089333	0.073333	0.089333	0.092	0.082667	0.08	0.097333	0.124	0.10133	0.072	0.058667	0.061333	0.092	0.12933	0.16667	0.196	0.168
0.050526	0.075789	0.070526	0.055789	0.048421	0.056842	0.075789	0.086316	0.077895	0.067368	0.089474	0.11053	0.10316	0.095789	0.10842	0.11263	0.089474	0.094737	0.11579	0.11263	0.10316	0.12421	0.14947	0.15474	0.10105	0.073684	0.091579	0.10316	0.085263	0.068421	0.08	0.067368	0.057895	0.072632	0.072632	0.064211	0.082105	0.098947	0.1	0.077895	0.055789	0.047368	0.057895	0.088421	0.10947	0.13474	0.19053	0.19579	0.13158	0.088421
0.024706	0.061176	0.095294	0.065882	0.045882	0.067059	0.081176	0.089412	0.089412	0.083529	0.070588	0.085882	0.10588	0.12471	0.11882	0.11294	0.10353	0.090588	0.11294	0.12941	0.12235	0.10353	0.12353	0.15176	0.10588	0.064706	0.082353	0.11529	0.11176	0.10706	0.085882	0.083529	0.092941	0.076471	0.076471	0.082353	0.071765	0.061176	0.071765	0.098824	0.10353	0.069412	0.054118	0.048235	0.048235	0.074118	0.10706	0.14706	0.18941	0.14941
0.064444	0.056667	0.045556	0.06	0.075556	0.076667	0.084444	0.086667	0.082222	0.087778	0.1	0.093333	0.077778	0.10222	0.11111	0.075556	0.081111	0.13	0.12667	0.10111	0.11333	0.14889	0.17667	0.14444	0.085556	0.058889	0.11111	0.11889	0.10111	0.077778	0.066667	0.088889	0.077778	0.062222	0.071111	0.068889	0.064444	0.064444	0.084444	0.10111	0.081111	0.055556	0.036667	0.055556	0.11667	0.14778	0.15778	0.19111	0.19444	0.12667
0.055556	0.077778	0.051111	0.047778	0.066667	0.073333	0.084444	0.088889	0.084444	0.074444	0.086667	0.11667	0.12667	0.11222	0.10111	0.086667	0.086667	0.11444	0.11333	0.10222	0.10222	0.13	0.16444	0.15	0.095556	0.06	0.074444	0.11556	0.11667	0.10556	0.086667	0.081111	0.092222	0.073333	0.067778	0.082222	0.076667	0.062222	0.064444	0.083333	0.10222	0.081111	0.053333	0.043333	0.055556	0.098889	0.13889	0.15778	0.18111	0.14222
0.10353	0.054118	0.078824	0.12824	0.10471	0.057647	0.052941	0.042353	0.051765	0.095294	0.16118	0.13059	0.061176	0.049412	0.056471	0.055294	0.055294	0.10118	0.10588	0.067059	0.061176	0.057647	0.035294	0.035294	0.058824	0.076471	0.052941	0.042353	0.082353	0.091765	0.06	0.081176	0.095294	0.067059	0.043529	0.074118	0.12824	0.14353	0.17882	0.13765	0.043529	0.023529	0.029412	0.047059	0.088235	0.11176	0.088235	0.082353	0.082353	0.049412
0.1	0.068	0.10133	0.15067	0.124	0.078667	0.057333	0.042667	0.064	0.124	0.18933	0.15333	0.082667	0.066667	0.062667	0.068	0.072	0.11333	0.11333	0.072	0.065333	0.050667	0.036	0.044	0.062667	0.098667	0.097333	0.085333	0.054667	0.092	0.10533	0.065333	0.085333	0.11067	0.08	0.046667	0.062667	0.085333	0.14667	0.19467	0.13867	0.056	0.016	0.028	0.050667	0.085333	0.12933	0.11467	0.088	0.069333
0.18778	0.021111	0.018889	0.066667	0.12889	0.093333	0.051111	0.044444	0.031111	0.045556	0.11333	0.15556	0.14444	0.093333	0.042222	0.057778	0.058889	0.07	0.098889	0.081111	0.05	0.056667	0.052222	0.033333	0.055556	0.071111	0.09	0.061111	0.056667	0.083333	0.072222	0.088889	0.10444	0.082222	0.065556	0.043333	0.074444	0.12222	0.17778	0.16	0.055556	0.035556	0.044444	0.036667	0.053333	0.091111	0.10222	0.09	0.081111	0.056667
0.118	0.015333	0.019333	0.06	0.074667	0.036	0.027333	0.027333	0.026	0.043333	0.084667	0.087333	0.061333	0.04	0.027333	0.032	0.028	0.046667	0.062667	0.044667	0.034	0.04	0.028	0.015333	0.029333	0.058	0.046667	0.028667	0.045333	0.066667	0.06	0.053333	0.051333	0.038667	0.03	0.042	0.061333	0.068	0.094	0.084	0.032	0.013333	0.013333	0.025333	0.047333	0.064	0.054667	0.048	0.049333	0.034
0.082857	0.082857	0.16571	0.18429	0.084286	0.062857	0.061429	0.051429	0.092857	0.16	0.18	0.11	0.04	0.061429	0.078571	0.064286	0.082857	0.14286	0.11571	0.064286	0.077143	0.058571	0.035714	0.045714	0.072857	0.1	0.10429	0.075714	0.08	0.11143	0.08	0.058571	0.094286	0.097143	0.072857	0.05	0.09	0.14571	0.19714	0.20286	0.10857	0.041429	0.03	0.038571	0.065714	0.12143	0.13714	0.10571	0.1	0.074286
0.11846	0.14462	0.18308	0.17231	0.12308	0.12615	0.16	0.12154	0.1	0.14308	0.17846	0.14462	0.092308	0.11077	0.10769	0.11385	0.14769	0.15692	0.14308	0.16	0.16769	0.11846	0.11538	0.18769	0.15385	0.12615	0.11846	0.15385	0.14769	0.12923	0.14615	0.13231	0.14154	0.16308	0.15385	0.13538	0.13538	0.14154	0.14	0.14769	0.13077	0.12462	0.13385	0.13846	0.20154	0.2	0.13846	0.12	0.12	0.10308
0.115	0.16	0.20167	0.18167	0.12833	0.11833	0.16333	0.14167	0.11333	0.16	0.195	0.17167	0.12667	0.125	0.11833	0.12667	0.15167	0.17	0.15833	0.17833	0.18333	0.13667	0.12167	0.15833	0.155	0.145	0.18333	0.165	0.13	0.15833	0.15833	0.15667	0.16	0.145	0.14333	0.14833	0.14667	0.14333	0.16333	0.15167	0.11667	0.11667	0.13333	0.18333	0.20333	0.15333	0.125	0.14833	0.16667	0.125
0.19167	0.19	0.13333	0.11833	0.16	0.13167	0.091667	0.16167	0.225	0.195	0.12167	0.115	0.12667	0.12167	0.14833	0.185	0.165	0.17167	0.17333	0.15667	0.14833	0.17167	0.17167	0.098333	0.12	0.16833	0.21	0.175	0.15167	0.15167	0.13667	0.16	0.15667	0.12333	0.14	0.14333	0.125	0.11333	0.13	0.12	0.12167	0.15167	0.17833	0.20667	0.18333	0.13667	0.14333	0.16833	0.19333	0.15167
0.11846	0.15385	0.17385	0.13385	0.11077	0.14	0.15692	0.10462	0.10923	0.16308	0.18154	0.14462	0.095385	0.11077	0.11077	0.12462	0.16462	0.16154	0.14769	0.17231	0.16769	0.11846	0.12462	0.17385	0.13692	0.14923	0.18308	0.13385	0.12923	0.15385	0.13077	0.15077	0.15385	0.12615	0.12769	0.12154	0.11385	0.10769	0.14308	0.14462	0.12462	0.12923	0.16308	0.2	0.16615	0.12	0.12615	0.14615	0.15538	0.12154
0.11538	0.12923	0.17231	0.19385	0.13846	0.093846	0.13692	0.14308	0.090769	0.12615	0.17846	0.16769	0.14154	0.12923	0.13077	0.11692	0.12615	0.18308	0.16615	0.14615	0.15231	0.15538	0.13077	0.12462	0.14	0.13538	0.17538	0.15231	0.11692	0.14308	0.14	0.14308	0.16923	0.15692	0.14769	0.15385	0.13385	0.11692	0.12769	0.12615	0.12154	0.12769	0.13077	0.16769	0.18308	0.13231	0.11077	0.12615	0.15385	0.12615
0.11375	0.0725	0.1025	0.125	0.10125	0.1075	0.1525	0.145	0.075	0.08	0.14	0.1575	0.1375	0.115	0.07875	0.10875	0.175	0.2	0.1525	0.1	0.11375	0.11625	0.1025	0.0975	0.1025	0.1075	0.0975	0.09875	0.105	0.12125	0.14	0.11	0.08125	0.0925	0.105	0.11	0.09625	0.0725	0.06875	0.10875	0.15125	0.1325	0.115	0.125	0.1325	0.155	0.15125	0.1275	0.15375	0.15375
0.10533	0.16267	0.132	0.077333	0.104	0.12533	0.10933	0.124	0.17467	0.136	0.072	0.10667	0.136	0.16533	0.17067	0.104	0.078667	0.14533	0.212	0.22133	0.15333	0.112	0.10933	0.098667	0.12	0.093333	0.090667	0.10667	0.12667	0.128	0.14533	0.15067	0.11067	0.10267	0.12267	0.144	0.11867	0.08	0.061333	0.082667	0.16	0.15867	0.124	0.144	0.152	0.16667	0.168	0.136	0.13867	0.156
0.1	0.13765	0.14588	0.097647	0.090588	0.11529	0.10706	0.098824	0.13294	0.15294	0.083529	0.061176	0.08	0.12235	0.14824	0.12235	0.077647	0.070588	0.14824	0.21412	0.18	0.10588	0.098824	0.091765	0.1	0.078824	0.074118	0.085882	0.097647	0.098824	0.10471	0.13765	0.11647	0.070588	0.090588	0.13882	0.12824	0.10118	0.084706	0.083529	0.14353	0.16471	0.12941	0.11529	0.13294	0.14	0.15882	0.14588	0.11647	0.14235
0.085882	0.11765	0.094118	0.062353	0.096471	0.11765	0.10824	0.12706	0.16353	0.11412	0.051765	0.090588	0.12706	0.15529	0.15529	0.089412	0.065882	0.13412	0.19059	0.18235	0.11882	0.089412	0.08	0.070588	0.1	0.082353	0.056471	0.071765	0.091765	0.11176	0.11176	0.13294	0.12471	0.087059	0.087059	0.11176	0.12941	0.12471	0.098824	0.062353	0.1	0.15059	0.13059	0.10235	0.11529	0.12353	0.14706	0.14471	0.10706	0.13059
0.08625	0.13125	0.12625	0.0775	0.1	0.14	0.11875	0.10125	0.15875	0.1425	0.065	0.115	0.1675	0.1925	0.18375	0.11125	0.06875	0.10125	0.16	0.1975	0.1475	0.095	0.0925	0.08875	0.11	0.11625	0.09	0.07125	0.07875	0.10125	0.1125	0.12875	0.1525	0.12625	0.0875	0.0975	0.1225	0.1225	0.125	0.09875	0.0675	0.10875	0.1625	0.1425	0.1175	0.13375	0.14625	0.17125	0.15875	0.14375
0.20578	0.17689	0.11822	0.12444	0.23733	0.264	0.18044	0.148	0.13422	0.20044	0.33156	0.28444	0.15644	0.16356	0.16	0.12622	0.15467	0.18222	0.23867	0.26578	0.15556	0.13333	0.19378	0.172	0.13556	0.19556	0.23289	0.17556	0.12933	0.11911	0.11111	0.19022	0.34178	0.35289	0.18311	0.067556	0.11111	0.15556	0.12978	0.12756	0.24089	0.29289	0.24444	0.19867	0.19733	0.18	0.16356	0.16533	0.16444	0.18089
0.15149	0.080426	0.10511	0.18468	0.23574	0.19447	0.14468	0.12894	0.19277	0.29617	0.25149	0.13957	0.11149	0.12553	0.11745	0.1583	0.17106	0.24553	0.27702	0.13191	0.11532	0.19404	0.18766	0.15191	0.16128	0.17787	0.16681	0.13021	0.11617	0.094894	0.093617	0.25149	0.38638	0.25319	0.097021	0.092766	0.13574	0.14894	0.12851	0.17277	0.2766	0.2583	0.18	0.17319	0.17489	0.16681	0.17319	0.1566	0.16298	0.16426
0.14941	0.11843	0.16745	0.21882	0.19373	0.14784	0.11373	0.12431	0.26941	0.28745	0.14706	0.10549	0.11451	0.10275	0.12353	0.16	0.18196	0.24706	0.18863	0.091373	0.14745	0.17412	0.15412	0.17529	0.15176	0.14588	0.13176	0.1098	0.10314	0.092549	0.10863	0.29294	0.3698	0.19294	0.084314	0.089804	0.11333	0.12	0.12353	0.19255	0.27294	0.23059	0.16196	0.1698	0.15373	0.15451	0.17922	0.16078	0.1698	0.15333
0.19702	0.18553	0.12043	0.11106	0.21532	0.25191	0.18553	0.15191	0.12383	0.15787	0.30638	0.28426	0.15404	0.1366	0.12638	0.11319	0.14596	0.17106	0.22553	0.27149	0.16255	0.12043	0.18511	0.16894	0.12596	0.19021	0.17617	0.13064	0.11404	0.10596	0.12043	0.28298	0.38298	0.22128	0.074043	0.091064	0.12766	0.1217	0.11021	0.17021	0.26511	0.24766	0.17915	0.1766	0.18213	0.16553	0.16383	0.17064	0.19574	0.1834
0.15447	0.1034	0.088936	0.15064	0.23404	0.20426	0.1383	0.13319	0.16	0.25489	0.26255	0.18085	0.14979	0.15745	0.13702	0.14383	0.15957	0.20894	0.26809	0.17489	0.10681	0.1766	0.1817	0.13702	0.16213	0.14255	0.19787	0.21574	0.16128	0.12383	0.10809	0.10383	0.17489	0.37191	0.34979	0.12255	0.062979	0.08	0.10979	0.12468	0.15106	0.22468	0.26426	0.2217	0.17064	0.17404	0.15234	0.15064	0.13745	0.11234
0.17822	0.196	0.20178	0.19911	0.14489	0.16	0.21422	0.25378	0.192	0.11244	0.13022	0.21822	0.28356	0.24044	0.16533	0.12356	0.12844	0.20222	0.29111	0.26889	0.19556	0.16489	0.12578	0.14756	0.20533	0.17067	0.15956	0.216	0.19733	0.18	0.18356	0.13378	0.13067	0.25867	0.36267	0.24933	0.12089	0.10489	0.14978	0.168	0.13156	0.18133	0.21156	0.208	0.22222	0.21289	0.184	0.13733	0.12178	0.14622
0.1613	0.1487	0.19826	0.17565	0.14261	0.17043	0.2087	0.24348	0.15913	0.10478	0.18087	0.23913	0.24087	0.19261	0.13826	0.12913	0.14522	0.2613	0.29391	0.22826	0.2087	0.15174	0.1287	0.15696	0.1987	0.17739	0.14261	0.2013	0.20913	0.17783	0.18348	0.1513	0.12087	0.19913	0.3287	0.29609	0.14696	0.08087	0.12304	0.1713	0.13913	0.14913	0.21087	0.21652	0.23	0.21783	0.19478	0.1487	0.10565	0.13783
0.15783	0.14913	0.17652	0.1387	0.15261	0.20043	0.24957	0.24522	0.13826	0.11217	0.21478	0.24391	0.18174	0.16652	0.13043	0.11652	0.15957	0.30304	0.30043	0.19217	0.18	0.12478	0.13652	0.15565	0.17174	0.17087	0.19261	0.2087	0.17739	0.17739	0.16435	0.1287	0.16652	0.33522	0.36087	0.17043	0.1	0.12087	0.1613	0.15391	0.1413	0.20304	0.2287	0.22783	0.21261	0.19739	0.14435	0.085652	0.089565	0.13957
0.17837	0.18408	0.17551	0.17551	0.16286	0.12694	0.16653	0.19184	0.22776	0.17551	0.10204	0.14	0.16245	0.23469	0.21918	0.13388	0.11755	0.12816	0.21143	0.27837	0.22776	0.17837	0.15633	0.10939	0.12816	0.16327	0.13959	0.20449	0.20571	0.17388	0.16939	0.13143	0.11959	0.24082	0.34	0.22204	0.11347	0.10857	0.14816	0.15429	0.10816	0.15918	0.19102	0.18531	0.20204	0.19918	0.18735	0.13633	0.10653	0.1302
0.15577	0.17692	0.18077	0.18038	0.11538	0.11885	0.18192	0.20308	0.15731	0.10269	0.10423	0.16962	0.22462	0.20538	0.15154	0.11923	0.11615	0.14846	0.22923	0.24654	0.19885	0.165	0.11923	0.12808	0.16846	0.15115	0.105	0.12385	0.18231	0.17538	0.155	0.15769	0.12231	0.11308	0.17423	0.31577	0.26462	0.11692	0.097308	0.12077	0.14731	0.10962	0.15731	0.185	0.18154	0.19423	0.18731	0.16923	0.11962	0.11692
0.085	0.091	0.103	0.092	0.074	0.097	0.124	0.137	0.107	0.067	0.093	0.101	0.074	0.077	0.097	0.105	0.093	0.086	0.126	0.171	0.14	0.11	0.082	0.092	0.123	0.14	0.121	0.14	0.156	0.17	0.141	0.098	0.071	0.078	0.111	0.099	0.079	0.088	0.114	0.101	0.063	0.083	0.089	0.081	0.094	0.089	0.071	0.071	0.075	0.09
0.12769	0.14462	0.17077	0.16308	0.12615	0.14154	0.16769	0.18769	0.16462	0.11538	0.12769	0.12154	0.10154	0.10462	0.13231	0.14462	0.14769	0.12923	0.15692	0.27846	0.3	0.20923	0.11538	0.076923	0.18	0.18769	0.17385	0.14923	0.16615	0.21538	0.23692	0.22923	0.17846	0.12	0.10769	0.15231	0.19231	0.2	0.15231	0.13231	0.17692	0.12923	0.098462	0.13538	0.12923	0.13385	0.17077	0.15385	0.12769	0.12923
0.12462	0.13385	0.16	0.14308	0.10615	0.12154	0.15692	0.18615	0.16308	0.11385	0.14	0.13846	0.10462	0.10923	0.13692	0.14462	0.14462	0.13231	0.17846	0.28769	0.28	0.19538	0.11231	0.087692	0.18615	0.17538	0.17538	0.16	0.17538	0.22615	0.24154	0.22308	0.17077	0.11538	0.10769	0.16	0.19231	0.18462	0.14615	0.13538	0.16462	0.11538	0.10615	0.14308	0.12615	0.13077	0.16769	0.14154	0.11846	0.12308
0.061667	0.07	0.0825	0.0675	0.063333	0.084167	0.095833	0.094167	0.07	0.0625	0.078333	0.076667	0.056667	0.068333	0.078333	0.085	0.0725	0.0875	0.13667	0.1475	0.12167	0.085	0.055	0.090833	0.10833	0.12583	0.095833	0.090833	0.10083	0.13417	0.14167	0.095	0.0675	0.061667	0.0675	0.096667	0.089167	0.055	0.064167	0.084167	0.0725	0.055833	0.071667	0.069167	0.065	0.075833	0.073333	0.07	0.066667	0.065833
0.068696	0.078261	0.08	0.069565	0.091304	0.1	0.093043	0.07913	0.063478	0.067826	0.069565	0.071304	0.081739	0.07913	0.08087	0.075652	0.08	0.13043	0.14174	0.11217	0.093043	0.055652	0.086957	0.11478	0.093913	0.12174	0.087826	0.094783	0.10696	0.13652	0.13652	0.089565	0.069565	0.064348	0.073043	0.1	0.087826	0.057391	0.066087	0.083478	0.07913	0.067826	0.082609	0.084348	0.083478	0.086087	0.070435	0.06	0.057391	0.066087
0.11375	0.075	0.08125	0.12	0.27125	0.3275	0.165	0.0325	0.10375	0.155	0.11625	0.10625	0.0925	0.09375	0.08625	0.10875	0.15375	0.1475	0.10625	0.0925	0.12	0.1125	0.075	0.07375	0.1	0.13375	0.13375	0.1475	0.11875	0.11375	0.11375	0.10625	0.135	0.1125	0.085	0.13625	0.1575	0.1375	0.13625	0.14375	0.12375	0.09625	0.1075	0.14	0.145	0.105	0.095	0.12375	0.1475	0.11125
0.10125	0.0625	0.07375	0.11	0.26625	0.33	0.16625	0.04	0.10625	0.15125	0.12125	0.11375	0.1	0.1025	0.09	0.11875	0.1675	0.14875	0.09875	0.08	0.1125	0.1025	0.07125	0.07	0.09	0.13	0.1325	0.13875	0.11625	0.10375	0.09375	0.1125	0.11875	0.09375	0.10625	0.145	0.13875	0.1075	0.11875	0.135	0.12875	0.1075	0.12125	0.14375	0.1125	0.08	0.1	0.145	0.185	0.12625
0.12286	0.084286	0.075714	0.10429	0.21571	0.33143	0.27571	0.11286	0.057143	0.13571	0.16286	0.13143	0.12286	0.11286	0.10143	0.11571	0.15143	0.19143	0.14714	0.091429	0.13143	0.14143	0.095714	0.084286	0.12714	0.15143	0.14	0.15429	0.15	0.12857	0.12714	0.11286	0.14143	0.14429	0.10714	0.14429	0.19	0.19429	0.17143	0.14714	0.14571	0.13857	0.12571	0.13143	0.15714	0.13571	0.10286	0.12571	0.14286	0.11429
0.10933	0.090667	0.068	0.078667	0.17867	0.3	0.27867	0.13333	0.046667	0.11067	0.14667	0.11067	0.098667	0.10267	0.098667	0.1	0.13467	0.18	0.14933	0.097333	0.12667	0.14667	0.10267	0.082667	0.11733	0.132	0.13467	0.14267	0.12667	0.11867	0.116	0.098667	0.13733	0.13733	0.094667	0.136	0.176	0.17067	0.15333	0.132	0.12933	0.124	0.112	0.12933	0.15733	0.12533	0.10133	0.128	0.144	0.11733
0.084	0.14	0.15067	0.1	0.074667	0.092	0.23333	0.33333	0.20933	0.058667	0.084	0.15333	0.14933	0.144	0.13067	0.11067	0.097333	0.12267	0.16667	0.17333	0.124	0.089333	0.128	0.13733	0.132	0.12133	0.104	0.12133	0.136	0.13067	0.11067	0.136	0.132	0.10667	0.136	0.16533	0.14933	0.12267	0.13067	0.13867	0.12267	0.10933	0.13867	0.15733	0.13733	0.12	0.13733	0.17333	0.21467	0.148
0.065333	0.070667	0.082667	0.072	0.073333	0.12	0.164	0.15467	0.12667	0.11067	0.081333	0.086667	0.11733	0.168	0.15333	0.070667	0.070667	0.12667	0.188	0.19333	0.124	0.098667	0.11333	0.098667	0.10133	0.108	0.094667	0.065333	0.093333	0.12667	0.132	0.094667	0.092	0.13867	0.116	0.097333	0.10533	0.10133	0.108	0.10933	0.116	0.10933	0.098667	0.089333	0.08	0.12133	0.184	0.20133	0.14667	0.090667
0.081333	0.073333	0.066667	0.086667	0.14933	0.16667	0.12	0.094667	0.084	0.070667	0.144	0.17333	0.13333	0.088	0.044	0.093333	0.17067	0.19067	0.124	0.096	0.11333	0.11333	0.136	0.156	0.11333	0.084	0.053333	0.093333	0.132	0.136	0.094667	0.097333	0.12533	0.10267	0.097333	0.10667	0.12667	0.13867	0.13067	0.124	0.11733	0.10133	0.085333	0.084	0.11333	0.156	0.20133	0.16133	0.076	0.097333
0.087143	0.085714	0.067143	0.1	0.16714	0.16857	0.12429	0.11	0.092857	0.078571	0.15	0.18571	0.15714	0.11286	0.06	0.085714	0.16714	0.21714	0.14571	0.098571	0.12714	0.13143	0.12	0.14286	0.13	0.12429	0.098571	0.061429	0.094286	0.13286	0.13	0.08	0.095714	0.14	0.11286	0.10857	0.11857	0.11714	0.12857	0.13571	0.15286	0.13429	0.10429	0.097143	0.087143	0.13	0.20286	0.21286	0.13857	0.10143
0.14154	0.19231	0.16	0.11692	0.08	0.1	0.17538	0.18923	0.13538	0.10308	0.095385	0.090769	0.092308	0.15538	0.19077	0.11385	0.052308	0.095385	0.19385	0.23846	0.16154	0.10154	0.12154	0.12923	0.12	0.10462	0.063077	0.12154	0.15385	0.14308	0.10615	0.12308	0.15846	0.12769	0.11231	0.12308	0.13385	0.12615	0.11692	0.12308	0.13692	0.13385	0.10308	0.092308	0.15538	0.20615	0.22	0.17231	0.11692	0.14
0.084286	0.092857	0.087143	0.067143	0.097143	0.14429	0.15571	0.13714	0.11286	0.1	0.081429	0.12714	0.17714	0.17857	0.11143	0.034286	0.07	0.18714	0.23143	0.14286	0.10714	0.11857	0.11286	0.12	0.10857	0.095714	0.06	0.087143	0.12286	0.13714	0.10429	0.1	0.14	0.12714	0.10571	0.098571	0.11143	0.12286	0.11286	0.11143	0.12286	0.10714	0.085714	0.082857	0.11571	0.17286	0.21429	0.15857	0.072857	0.10857
0.11333	0.12778	0.21	0.18556	0.14889	0.20111	0.25333	0.20111	0.14333	0.13556	0.16111	0.25222	0.30444	0.31556	0.25444	0.19222	0.16333	0.13333	0.19556	0.24111	0.21	0.14778	0.087778	0.10222	0.17778	0.094444	0.19778	0.33222	0.30556	0.20556	0.16	0.15333	0.14111	0.14778	0.18333	0.21111	0.21111	0.21111	0.24667	0.23111	0.15333	0.14	0.17333	0.18444	0.20556	0.20444	0.15333	0.14444	0.14778	0.11667
0.12211	0.18	0.17895	0.16421	0.20105	0.23053	0.18	0.14316	0.13263	0.15053	0.26	0.29579	0.24842	0.21684	0.18	0.15474	0.13895	0.20316	0.21895	0.18632	0.14737	0.078947	0.11895	0.19158	0.17789	0.13684	0.12947	0.20947	0.30842	0.29895	0.22	0.15158	0.15474	0.15684	0.14211	0.15053	0.17789	0.18316	0.19789	0.21895	0.21579	0.16421	0.11684	0.13263	0.18316	0.20737	0.18	0.14105	0.12842	0.12105
0.10316	0.12947	0.16316	0.19263	0.23474	0.20737	0.14842	0.12526	0.15895	0.25053	0.31368	0.24947	0.17053	0.18	0.15474	0.12737	0.18947	0.23158	0.19263	0.13789	0.086316	0.11684	0.18526	0.23895	0.18737	0.13368	0.12842	0.20947	0.30737	0.3	0.22842	0.16737	0.16526	0.15684	0.15053	0.18211	0.20421	0.19368	0.21579	0.24737	0.23263	0.17158	0.12737	0.13263	0.16947	0.18421	0.16	0.11684	0.095789	0.10421
0.10778	0.14	0.18111	0.20778	0.24444	0.20667	0.14222	0.13	0.18556	0.28222	0.32667	0.25	0.16667	0.17556	0.15	0.13667	0.20444	0.23778	0.20333	0.14222	0.086667	0.13444	0.21667	0.27222	0.19778	0.16	0.16222	0.16667	0.28222	0.34222	0.24556	0.17	0.16556	0.17	0.16667	0.17778	0.19778	0.20889	0.23444	0.25333	0.25778	0.20889	0.13444	0.13111	0.17778	0.19667	0.18333	0.15222	0.10444	0.096667
0.097895	0.11684	0.18105	0.16211	0.17368	0.20842	0.22842	0.18421	0.12737	0.12421	0.18632	0.27158	0.29684	0.29263	0.22211	0.17263	0.15684	0.14632	0.20526	0.22421	0.18737	0.13158	0.086316	0.12526	0.19579	0.11263	0.10421	0.19789	0.30316	0.29579	0.22	0.15789	0.15053	0.14737	0.15158	0.17474	0.18526	0.17053	0.19579	0.23053	0.22421	0.16842	0.13368	0.15053	0.17789	0.19368	0.18316	0.15368	0.13895	0.12842
0.087568	0.11297	0.084865	0.047027	0.12378	0.12108	0.085405	0.12595	0.11459	0.13405	0.13189	0.075676	0.060541	0.11514	0.1573	0.15297	0.13568	0.10919	0.078919	0.065405	0.074595	0.12811	0.23838	0.20162	0.13297	0.09027	0.065946	0.081622	0.12919	0.11784	0.10595	0.13568	0.15405	0.13189	0.12324	0.17189	0.15243	0.098378	0.11568	0.12919	0.091892	0.073514	0.11351	0.15081	0.16	0.11081	0.064324	0.12811	0.16162	0.10541
0.060513	0.073846	0.10205	0.10462	0.051795	0.089744	0.11795	0.080513	0.10103	0.10513	0.10872	0.11487	0.10154	0.074872	0.065641	0.14564	0.17385	0.13846	0.12359	0.085641	0.062564	0.074359	0.095897	0.17179	0.16359	0.060513	0.039487	0.08359	0.10923	0.10103	0.11231	0.12872	0.12872	0.10513	0.13231	0.15538	0.10769	0.069744	0.097436	0.086667	0.056923	0.084103	0.11436	0.12359	0.098974	0.068205	0.12103	0.16308	0.11692	0.083077
0.07619	0.083333	0.082857	0.042381	0.10238	0.11381	0.071429	0.10143	0.097619	0.10286	0.1119	0.072381	0.045714	0.074286	0.13095	0.15143	0.12048	0.10238	0.076667	0.052857	0.062857	0.09381	0.18762	0.19143	0.11857	0.077619	0.050476	0.083333	0.11762	0.10381	0.10048	0.12381	0.13476	0.10143	0.10619	0.15048	0.11238	0.059048	0.097143	0.10333	0.064286	0.075714	0.11	0.13095	0.11381	0.07	0.080952	0.13238	0.12286	0.08
0.084	0.112	0.0715	0.0435	0.113	0.1045	0.0775	0.1115	0.1035	0.1275	0.1185	0.064	0.056	0.112	0.1465	0.1345	0.1235	0.099	0.07	0.0625	0.073	0.128	0.2195	0.173	0.1255	0.0755	0.059	0.0785	0.119	0.1085	0.101	0.1245	0.1405	0.12	0.11	0.1535	0.1365	0.091	0.1095	0.123	0.087	0.07	0.102	0.1365	0.1495	0.0995	0.057	0.1205	0.1495	0.0985
0.082791	0.097674	0.053488	0.072558	0.11023	0.08186	0.087907	0.09907	0.095814	0.10977	0.086047	0.06186	0.069767	0.13023	0.15488	0.12	0.10977	0.081395	0.05814	0.065581	0.085116	0.17395	0.20605	0.10465	0.098605	0.079535	0.057209	0.07814	0.10837	0.093953	0.096744	0.12372	0.13209	0.10651	0.10233	0.14233	0.12233	0.08	0.10837	0.11767	0.076279	0.066977	0.090233	0.11907	0.14	0.091163	0.06	0.12698	0.13163	0.077674
0.19462	0.22154	0.17923	0.13769	0.14077	0.19538	0.24154	0.21385	0.13846	0.14	0.20385	0.20385	0.17385	0.22	0.27923	0.22692	0.13462	0.088462	0.17	0.28	0.20385	0.21385	0.29846	0.27	0.20077	0.18385	0.15462	0.14154	0.24077	0.28077	0.19615	0.16692	0.19692	0.18231	0.16615	0.24538	0.24462	0.19077	0.19846	0.16538	0.17154	0.21308	0.21615	0.26154	0.28154	0.19077	0.14615	0.17615	0.18154	0.16923
0.11937	0.14938	0.21	0.16875	0.11313	0.10687	0.15687	0.18438	0.17875	0.14688	0.12375	0.16062	0.18	0.16562	0.16687	0.24188	0.21313	0.10687	0.075625	0.1325	0.20563	0.15063	0.15563	0.2325	0.18563	0.14625	0.1275	0.13375	0.2175	0.21875	0.14188	0.13312	0.15687	0.14438	0.13312	0.19625	0.19875	0.1525	0.15375	0.13125	0.14188	0.1675	0.16	0.19937	0.22687	0.16187	0.12687	0.1475	0.14625	0.13812
0.15172	0.21931	0.18414	0.13103	0.11586	0.14897	0.20621	0.20483	0.16759	0.11931	0.17241	0.2069	0.16138	0.1669	0.23103	0.2531	0.16345	0.087586	0.10276	0.24621	0.22483	0.14138	0.23517	0.27241	0.18552	0.18897	0.15793	0.12	0.18345	0.25931	0.19379	0.13793	0.16	0.15655	0.14483	0.20069	0.22828	0.20138	0.18552	0.15724	0.14897	0.18276	0.18759	0.20483	0.26207	0.19655	0.12552	0.14483	0.15862	0.17103
0.12788	0.17879	0.15636	0.14061	0.12121	0.14848	0.20364	0.20364	0.1697	0.11091	0.14848	0.18424	0.14909	0.14667	0.19212	0.22545	0.15636	0.092727	0.10303	0.22303	0.20424	0.11091	0.20848	0.23515	0.15697	0.14485	0.13818	0.22061	0.22545	0.14848	0.14242	0.15636	0.14424	0.1503	0.19697	0.17879	0.15212	0.15636	0.13273	0.14364	0.1703	0.16364	0.21455	0.20303	0.12182	0.11818	0.13758	0.16667	0.19636	0.1503
0.16276	0.21172	0.18138	0.14414	0.12828	0.17034	0.22621	0.2131	0.16759	0.13448	0.18207	0.20414	0.16828	0.18552	0.22138	0.2131	0.14552	0.084138	0.12276	0.25931	0.21103	0.14207	0.24345	0.26	0.17655	0.19034	0.12345	0.19241	0.26276	0.20483	0.14414	0.16	0.17103	0.14552	0.17448	0.23103	0.20138	0.15448	0.15379	0.14552	0.18552	0.19103	0.20759	0.2531	0.19241	0.13172	0.1469	0.17655	0.18	0.15379
0.092857	0.11214	0.15429	0.15071	0.13143	0.11143	0.10643	0.11929	0.15143	0.17857	0.16143	0.13	0.11571	0.11214	0.12571	0.11357	0.12857	0.20286	0.16357	0.125	0.15	0.165	0.225	0.20286	0.115	0.12643	0.12	0.14429	0.14571	0.17929	0.15071	0.079286	0.066429	0.13429	0.20143	0.22571	0.19143	0.14286	0.11357	0.10429	0.14929	0.22429	0.23714	0.14786	0.10286	0.12143	0.11214	0.077143	0.080714	0.12786
0.1088	0.1392	0.1656	0.1664	0.132	0.116	0.124	0.1352	0.172	0.1952	0.1512	0.112	0.1072	0.136	0.1288	0.1336	0.2064	0.1904	0.1608	0.1744	0.1632	0.232	0.2696	0.1664	0.104	0.148	0.1304	0.1488	0.16	0.192	0.1616	0.092	0.0768	0.1384	0.2136	0.2616	0.212	0.1424	0.116	0.1104	0.1608	0.2488	0.2432	0.1456	0.1256	0.1416	0.1296	0.0992	0.1072	0.1424
0.097778	0.11333	0.14667	0.14889	0.13111	0.1163	0.10667	0.10296	0.15333	0.20667	0.17778	0.12963	0.11111	0.11185	0.1363	0.12667	0.14148	0.21407	0.1763	0.14815	0.17037	0.15926	0.21704	0.22222	0.13704	0.14667	0.085185	0.11259	0.14074	0.16444	0.18148	0.15333	0.097778	0.065185	0.11185	0.20741	0.24148	0.21778	0.19852	0.14148	0.10667	0.13037	0.24444	0.26444	0.15259	0.11259	0.12593	0.12074	0.10074	0.11926
0.1064	0.092	0.1	0.1288	0.1632	0.168	0.1304	0.1216	0.1096	0.0992	0.1784	0.2296	0.2064	0.1688	0.1224	0.1392	0.14	0.1344	0.2032	0.2144	0.1784	0.1856	0.1648	0.1824	0.1896	0.1592	0.1144	0.1224	0.1168	0.1448	0.1744	0.1504	0.1048	0.084	0.1152	0.1864	0.2392	0.2368	0.2112	0.1496	0.1104	0.1312	0.2408	0.2448	0.152	0.1464	0.152	0.1264	0.1016	0.1256
0.096296	0.082963	0.13185	0.15926	0.14741	0.1237	0.11037	0.11704	0.12593	0.15111	0.19259	0.16519	0.11556	0.11111	0.11778	0.12148	0.12	0.19185	0.20593	0.14963	0.15185	0.15037	0.18148	0.23556	0.16593	0.14222	0.1163	0.13185	0.15111	0.17556	0.15333	0.096296	0.067407	0.12741	0.18889	0.22222	0.20296	0.15259	0.12593	0.11704	0.14519	0.20889	0.24444	0.16667	0.11259	0.13407	0.1237	0.087407	0.08963	0.11926
0.087333	0.044	0.068	0.08	0.060667	0.059333	0.128	0.21133	0.13733	0.039333	0.047333	0.071333	0.082667	0.056667	0.041333	0.12333	0.16133	0.134	0.083333	0.033333	0.068667	0.20667	0.22867	0.106	0.080667	0.1	0.14333	0.14	0.091333	0.072667	0.097333	0.102	0.078667	0.090667	0.10467	0.074	0.076667	0.098667	0.11733	0.124	0.086667	0.090667	0.11933	0.138	0.14467	0.087333	0.070667	0.072667	0.054	0.092667
0.081333	0.062667	0.062667	0.071333	0.066	0.06	0.078667	0.148	0.21267	0.12867	0.038667	0.046667	0.048	0.06	0.048	0.068	0.13867	0.15267	0.12533	0.063333	0.027333	0.112	0.23133	0.196	0.084	0.098	0.126	0.10333	0.062667	0.082	0.10333	0.085333	0.084667	0.10133	0.085333	0.067333	0.097333	0.12133	0.126	0.099333	0.085333	0.10333	0.16133	0.172	0.077333	0.052667	0.086667	0.08	0.1	0.11333
0.082	0.059333	0.064	0.071333	0.061333	0.056	0.084667	0.16467	0.20067	0.104	0.034667	0.040667	0.036	0.052	0.055333	0.079333	0.13867	0.14933	0.11733	0.060667	0.030667	0.12133	0.232	0.17867	0.086	0.09	0.12133	0.10933	0.070667	0.074667	0.098667	0.087333	0.082	0.099333	0.095333	0.067333	0.086667	0.116	0.12733	0.104	0.076667	0.092	0.15	0.17867	0.10333	0.049333	0.082667	0.082667	0.082667	0.11267
0.06	0.065455	0.075758	0.061818	0.055758	0.08	0.17212	0.18121	0.066667	0.032727	0.052121	0.052727	0.049697	0.035152	0.073333	0.14848	0.13879	0.099394	0.058182	0.035758	0.12848	0.22909	0.15879	0.062424	0.055758	0.093333	0.096364	0.07697	0.062424	0.092121	0.09697	0.070909	0.078182	0.093939	0.073333	0.078788	0.11273	0.12242	0.11333	0.091515	0.090303	0.099394	0.13939	0.13758	0.060606	0.052727	0.064848	0.064848	0.11091	0.10727
0.093793	0.051034	0.069655	0.08	0.064138	0.064828	0.13862	0.21931	0.15379	0.053103	0.055172	0.071724	0.064828	0.055172	0.045517	0.11586	0.1669	0.15448	0.10207	0.045517	0.066207	0.19586	0.24	0.11724	0.071034	0.1131	0.12207	0.14483	0.11448	0.071724	0.08069	0.11517	0.097931	0.088276	0.10069	0.088276	0.076552	0.074483	0.10138	0.12552	0.10276	0.085517	0.10552	0.13586	0.16966	0.12414	0.05931	0.087586	0.075862	0.082069
0.17444	0.28556	0.24	0.19667	0.24667	0.22667	0.19333	0.13778	0.12889	0.16	0.22667	0.26889	0.24222	0.16	0.11444	0.26667	0.22556	0.034444	0.034444	0.21889	0.31556	0.20333	0.11444	0.11333	0.15889	0.21	0.22667	0.19556	0.16111	0.14444	0.18444	0.20667	0.16222	0.20444	0.25667	0.24889	0.19222	0.12444	0.10333	0.14222	0.21889	0.20333	0.2	0.23222	0.17667	0.11889	0.12889	0.19	0.21	0.13556
0.12211	0.23895	0.30737	0.21158	0.19579	0.21895	0.20632	0.19263	0.12632	0.11895	0.16316	0.20632	0.23789	0.22316	0.14526	0.13579	0.21263	0.13789	0.02	0.063158	0.21053	0.27368	0.17368	0.086316	0.14842	0.18105	0.17368	0.14632	0.14316	0.18316	0.21158	0.17579	0.17053	0.24947	0.27158	0.20737	0.13474	0.094737	0.12	0.17789	0.18421	0.15368	0.20316	0.20211	0.12105	0.098947	0.16105	0.22	0.18211	0.10737
0.14889	0.24556	0.35556	0.29111	0.2	0.23889	0.22333	0.19111	0.13444	0.11556	0.18444	0.23111	0.22667	0.26333	0.18444	0.11	0.22667	0.21667	0.067778	0.0088889	0.15778	0.34	0.27111	0.12	0.14667	0.22222	0.24444	0.24	0.19222	0.16667	0.16444	0.22444	0.22889	0.16889	0.20889	0.27556	0.25778	0.21778	0.15556	0.10778	0.18556	0.22111	0.17333	0.17889	0.22	0.17667	0.10556	0.13889	0.21556	0.18444
0.18	0.24947	0.20526	0.19895	0.21474	0.19053	0.18211	0.13053	0.11789	0.14632	0.22421	0.24737	0.18737	0.13684	0.12632	0.23368	0.16737	0.016842	0.071579	0.25789	0.27474	0.14	0.094737	0.11474	0.13158	0.16842	0.15158	0.13579	0.13579	0.18947	0.21158	0.15368	0.16105	0.23789	0.24632	0.16632	0.10421	0.094737	0.13789	0.19579	0.18	0.16211	0.22	0.18842	0.10421	0.11053	0.18737	0.22	0.16105	0.10842
0.18778	0.27222	0.23222	0.22222	0.23667	0.20444	0.17556	0.12778	0.15444	0.18889	0.24111	0.25667	0.19556	0.14444	0.14111	0.27	0.19444	0.018889	0.061111	0.27111	0.31889	0.16778	0.10556	0.12111	0.14222	0.20556	0.20889	0.18667	0.16	0.15333	0.18111	0.21111	0.18333	0.19111	0.24	0.25667	0.21	0.15111	0.12	0.13333	0.21667	0.21222	0.18222	0.22111	0.19444	0.12778	0.11	0.16667	0.21889	0.14778
0.14222	0.034444	0.09	0.27	0.34111	0.21111	0.088889	0.11111	0.21333	0.20889	0.19333	0.20556	0.17333	0.17778	0.20333	0.23556	0.15556	0.12556	0.24889	0.31889	0.23889	0.15778	0.15111	0.13	0.15889	0.15778	0.18222	0.22778	0.22667	0.19111	0.17556	0.18	0.16667	0.14556	0.12333	0.15778	0.20222	0.19778	0.17667	0.19778	0.22	0.15778	0.14222	0.17778	0.23111	0.24	0.21778	0.21	0.17889	0.17
0.12105	0.029474	0.11263	0.28632	0.31158	0.17789	0.082105	0.11474	0.2	0.19368	0.18316	0.19158	0.16632	0.18105	0.19895	0.21789	0.14211	0.13579	0.26	0.29263	0.21895	0.14632	0.14	0.12737	0.15158	0.16526	0.18316	0.21579	0.21158	0.17789	0.16632	0.17789	0.16316	0.14316	0.12316	0.15263	0.20421	0.20632	0.17684	0.18211	0.19789	0.14421	0.13895	0.17053	0.21895	0.23053	0.20421	0.19474	0.16105	0.14737
0.070476	0.051429	0.23714	0.31524	0.17048	0.086667	0.1019	0.15905	0.17048	0.1619	0.16476	0.14857	0.13524	0.18857	0.20857	0.14	0.095238	0.19238	0.27429	0.21238	0.15333	0.12286	0.11524	0.10857	0.14762	0.14286	0.15143	0.19048	0.18762	0.15524	0.14952	0.15333	0.13714	0.1219	0.10857	0.12762	0.16857	0.17714	0.16476	0.17048	0.17429	0.12667	0.11238	0.15333	0.21238	0.22	0.19524	0.18286	0.15905	0.14381
0.17895	0.21053	0.090526	0.017895	0.19684	0.33895	0.22842	0.10632	0.093684	0.17263	0.21053	0.17474	0.15579	0.16421	0.17789	0.21579	0.20947	0.16421	0.11158	0.19789	0.31474	0.24421	0.15579	0.11158	0.11158	0.14316	0.16316	0.18526	0.18737	0.20526	0.19158	0.17053	0.17474	0.17579	0.15579	0.10947	0.14526	0.18947	0.21368	0.19474	0.19579	0.19368	0.13789	0.15158	0.19789	0.22947	0.20211	0.16632	0.16	0.13789
0.17474	0.22842	0.11684	0.02	0.17579	0.33158	0.24842	0.11579	0.087368	0.15684	0.19789	0.16105	0.13263	0.13895	0.16737	0.22526	0.21474	0.17368	0.11158	0.18	0.32947	0.27789	0.17263	0.11684	0.10632	0.14421	0.16421	0.18737	0.18421	0.20211	0.19474	0.17684	0.17474	0.16632	0.16	0.12526	0.13684	0.16632	0.20947	0.20842	0.19368	0.19895	0.15263	0.14632	0.18842	0.23158	0.21474	0.17053	0.15158	0.12842
0.084444	0.12667	0.13111	0.093333	0.088889	0.093333	0.11778	0.10667	0.06	0.073333	0.13556	0.16889	0.16889	0.17333	0.16889	0.16889	0.14667	0.14444	0.16	0.11333	0.08	0.14444	0.18667	0.12222	0.10889	0.13111	0.11111	0.075556	0.091111	0.13333	0.15333	0.13556	0.10667	0.12444	0.16222	0.16222	0.14889	0.13778	0.11778	0.088889	0.11556	0.15111	0.12667	0.11333	0.11111	0.088889	0.10889	0.14667	0.16	0.13333
0.10364	0.096364	0.069091	0.067273	0.070909	0.087273	0.081818	0.063636	0.069091	0.098182	0.12182	0.13818	0.14909	0.14182	0.12909	0.13273	0.11818	0.12	0.11091	0.076364	0.1	0.14909	0.11636	0.050909	0.078182	0.10364	0.090909	0.056364	0.065455	0.11091	0.12364	0.10364	0.089091	0.089091	0.11273	0.13091	0.12545	0.12	0.10909	0.087273	0.092727	0.12	0.11455	0.098182	0.089091	0.072727	0.074545	0.10182	0.12545	0.10909
0.122	0.112	0.08	0.074	0.08	0.096	0.092	0.07	0.07	0.1	0.152	0.174	0.168	0.156	0.15	0.16	0.142	0.134	0.116	0.076	0.112	0.202	0.168	0.072	0.108	0.108	0.062	0.064	0.098	0.14	0.146	0.11	0.096	0.14	0.154	0.138	0.132	0.112	0.098	0.104	0.148	0.142	0.116	0.116	0.09	0.082	0.12	0.138	0.132	0.138
0.093333	0.066667	0.08	0.086667	0.1	0.12	0.091111	0.06	0.077778	0.11778	0.15778	0.17556	0.16889	0.15778	0.16667	0.16222	0.15333	0.15778	0.12222	0.10667	0.16444	0.19556	0.12	0.055556	0.095556	0.10667	0.062222	0.10889	0.13778	0.13333	0.12444	0.11111	0.13556	0.16444	0.15333	0.14	0.12	0.10222	0.10667	0.13556	0.14222	0.11111	0.11333	0.10222	0.077778	0.11111	0.16444	0.14222	0.088889	0.088889
0.10889	0.11333	0.13333	0.11111	0.073333	0.071111	0.091111	0.12	0.10444	0.08	0.097778	0.12444	0.13333	0.16	0.18	0.17111	0.17778	0.15778	0.13333	0.13556	0.10889	0.095556	0.14444	0.17556	0.12444	0.084444	0.11556	0.093333	0.075556	0.10667	0.12889	0.14667	0.14	0.12444	0.14667	0.15556	0.14889	0.15111	0.16	0.13333	0.10222	0.13556	0.15556	0.14	0.12444	0.082222	0.084444	0.14444	0.15556	0.12222
0.052	0.076	0.112	0.094	0.074	0.102	0.144	0.122	0.088	0.086	0.084	0.116	0.14	0.15	0.12	0.068	0.054	0.074	0.112	0.096	0.062	0.054	0.05	0.058	0.056	0.048	0.046	0.038	0.056	0.082	0.088	0.062	0.064	0.102	0.104	0.092	0.09	0.084	0.074	0.096	0.114	0.08	0.064	0.072	0.096	0.11	0.126	0.14	0.14	0.114
0.095556	0.12	0.10444	0.084444	0.13778	0.16222	0.12222	0.10667	0.095556	0.088889	0.12444	0.15778	0.16444	0.12889	0.075556	0.071111	0.088889	0.10889	0.088889	0.051111	0.06	0.073333	0.064444	0.042222	0.046667	0.044444	0.035556	0.042222	0.053333	0.08	0.10667	0.077778	0.066667	0.1	0.11556	0.1	0.086667	0.08	0.082222	0.10222	0.12667	0.1	0.073333	0.077778	0.10222	0.12444	0.14	0.16	0.17333	0.13778
0.092727	0.11273	0.10182	0.085455	0.13091	0.13818	0.1	0.087273	0.081818	0.069091	0.096364	0.12182	0.12364	0.10182	0.072727	0.063636	0.070909	0.10364	0.089091	0.049091	0.056364	0.06	0.049091	0.032727	0.036364	0.034545	0.043636	0.06	0.074545	0.083636	0.067273	0.047273	0.06	0.098182	0.098182	0.076364	0.072727	0.069091	0.076364	0.094545	0.092727	0.065455	0.058182	0.072727	0.090909	0.10727	0.12364	0.14	0.14727	0.12545
0.10857	0.14857	0.12	0.10571	0.17714	0.2	0.14571	0.13143	0.12857	0.13714	0.19429	0.19429	0.15429	0.14	0.1	0.094286	0.13714	0.16	0.12286	0.082857	0.091429	0.10571	0.088571	0.057143	0.074286	0.08	0.077143	0.08	0.071429	0.10286	0.13429	0.11143	0.082857	0.094286	0.13143	0.13429	0.11429	0.10286	0.11714	0.12571	0.14286	0.14857	0.11429	0.10857	0.14	0.15714	0.16286	0.19143	0.21429	0.18
0.072	0.116	0.106	0.072	0.13	0.15	0.108	0.092	0.086	0.084	0.128	0.162	0.16	0.126	0.082	0.06	0.07	0.116	0.1	0.056	0.06	0.066	0.058	0.042	0.042	0.044	0.05	0.05	0.064	0.078	0.084	0.068	0.068	0.096	0.104	0.09	0.072	0.06	0.066	0.092	0.112	0.078	0.056	0.074	0.094	0.12	0.14	0.154	0.18	0.148
0.11778	0.091111	0.11778	0.14222	0.10889	0.11111	0.15778	0.14444	0.14667	0.18667	0.18444	0.19333	0.2	0.19111	0.13778	0.093333	0.12222	0.15556	0.13111	0.093333	0.073333	0.073333	0.082222	0.082222	0.11333	0.14889	0.23111	0.18667	0.11111	0.12	0.13778	0.11111	0.10667	0.13111	0.13556	0.13111	0.11333	0.10667	0.12667	0.15556	0.16444	0.15778	0.10667	0.084444	0.10889	0.10889	0.13556	0.11778	0.062222	0.086667
0.118	0.1	0.104	0.112	0.092	0.102	0.138	0.124	0.144	0.172	0.168	0.182	0.176	0.142	0.094	0.086	0.12	0.142	0.108	0.078	0.06	0.064	0.074	0.066	0.086	0.114	0.162	0.138	0.116	0.13	0.13	0.104	0.106	0.104	0.1	0.112	0.114	0.1	0.126	0.148	0.146	0.124	0.092	0.096	0.108	0.104	0.102	0.076	0.066	0.094
0.12222	0.12889	0.10667	0.095556	0.14222	0.14889	0.14222	0.16222	0.17778	0.17556	0.2	0.17111	0.10667	0.088889	0.11556	0.17111	0.15111	0.11111	0.082222	0.062222	0.084444	0.093333	0.095556	0.10667	0.11333	0.12222	0.082222	0.16444	0.18	0.14222	0.14667	0.15556	0.11556	0.11333	0.13333	0.11333	0.11333	0.11111	0.12	0.12889	0.16	0.16667	0.13556	0.10444	0.10222	0.11111	0.095556	0.093333	0.1	0.11556
0.122	0.096	0.114	0.094	0.09	0.114	0.114	0.126	0.176	0.172	0.164	0.18	0.172	0.13	0.08	0.106	0.142	0.13	0.09	0.05	0.05	0.086	0.098	0.106	0.102	0.122	0.156	0.192	0.144	0.112	0.12	0.11	0.094	0.108	0.114	0.108	0.104	0.108	0.114	0.134	0.15	0.132	0.098	0.086	0.092	0.096	0.1	0.09	0.068	0.084
0.104	0.088	0.104	0.106	0.088	0.094	0.118	0.13	0.162	0.166	0.148	0.156	0.152	0.122	0.08	0.09	0.124	0.122	0.094	0.074	0.062	0.068	0.068	0.074	0.082	0.094	0.132	0.12	0.11	0.134	0.124	0.102	0.11	0.102	0.1	0.104	0.112	0.108	0.126	0.152	0.146	0.104	0.084	0.094	0.1	0.1	0.086	0.068	0.074	0.082
0.1	0.10444	0.095556	0.093333	0.11333	0.11111	0.11111	0.11778	0.10889	0.11333	0.14444	0.16667	0.16444	0.14222	0.13111	0.13556	0.13111	0.12222	0.11333	0.097778	0.13111	0.15333	0.14	0.14889	0.11556	0.10222	0.11556	0.12222	0.11333	0.12444	0.14222	0.14889	0.16889	0.17556	0.15556	0.16222	0.12889	0.075556	0.08	0.10222	0.15333	0.16	0.12444	0.1	0.068889	0.073333	0.084444	0.1	0.12889	0.10889
0.108	0.084	0.086	0.096	0.094	0.092	0.09	0.084	0.102	0.14	0.152	0.134	0.12	0.122	0.102	0.094	0.106	0.12	0.098	0.104	0.126	0.12	0.142	0.176	0.124	0.1	0.092	0.114	0.102	0.1	0.134	0.136	0.14	0.16	0.154	0.17	0.146	0.1	0.096	0.082	0.106	0.134	0.116	0.088	0.054	0.06	0.074	0.088	0.128	0.108
0.10571	0.14857	0.15714	0.10571	0.097143	0.14	0.15714	0.13714	0.13429	0.14	0.15429	0.19714	0.21714	0.22571	0.19429	0.17429	0.16286	0.14571	0.16	0.17429	0.16286	0.18857	0.19143	0.15714	0.16	0.12286	0.12857	0.16571	0.16571	0.14286	0.15429	0.16286	0.15714	0.22	0.22857	0.20286	0.20857	0.2	0.14857	0.10571	0.15714	0.20571	0.18286	0.14	0.11429	0.10571	0.11143	0.11143	0.14286	0.16
0.088889	0.11111	0.086667	0.077778	0.12889	0.14	0.11778	0.10222	0.095556	0.12	0.15333	0.16889	0.16444	0.14667	0.12889	0.12889	0.12889	0.13111	0.13333	0.12222	0.14444	0.15556	0.12889	0.11778	0.10889	0.091111	0.086667	0.11556	0.13111	0.12667	0.13556	0.16	0.15111	0.16222	0.18	0.17111	0.17778	0.17333	0.12444	0.08	0.10667	0.15111	0.15333	0.10667	0.084444	0.073333	0.08	0.088889	0.1	0.11333
0.075	0.1025	0.105	0.0775	0.105	0.13	0.115	0.12	0.0975	0.0925	0.1375	0.1725	0.18	0.1675	0.1425	0.135	0.14	0.125	0.1225	0.12	0.1225	0.1575	0.16	0.135	0.1325	0.0875	0.0925	0.11	0.1375	0.125	0.11	0.1625	0.155	0.1625	0.195	0.1925	0.195	0.175	0.1425	0.095	0.095	0.14	0.16	0.12	0.09	0.0675	0.0725	0.0975	0.0825	0.0975
0.062759	0.048276	0.058621	0.069655	0.061379	0.057241	0.058621	0.074483	0.084828	0.083448	0.10483	0.088966	0.056552	0.058621	0.11034	0.14207	0.088276	0.046897	0.073793	0.10483	0.088276	0.064138	0.05931	0.064138	0.054483	0.064138	0.056552	0.051724	0.043448	0.070345	0.089655	0.08	0.077241	0.091034	0.088276	0.068276	0.070345	0.078621	0.075172	0.077241	0.089655	0.076552	0.077931	0.096552	0.1	0.081379	0.055172	0.065517	0.083448	0.071724
0.062222	0.06	0.068889	0.073333	0.067407	0.064444	0.058519	0.075556	0.097778	0.09037	0.10593	0.094074	0.056296	0.058519	0.11111	0.15333	0.10296	0.046667	0.071111	0.11481	0.10074	0.066667	0.062963	0.072593	0.063704	0.073333	0.053333	0.05037	0.04963	0.082963	0.10074	0.091111	0.085926	0.092593	0.078519	0.061481	0.077778	0.082963	0.08	0.088889	0.10222	0.082222	0.09037	0.10741	0.10222	0.077778	0.055556	0.077037	0.09037	0.074815
0.054286	0.045714	0.054286	0.067857	0.065714	0.06	0.06	0.078571	0.098571	0.092143	0.10714	0.097143	0.062857	0.059286	0.10786	0.15643	0.105	0.049286	0.072143	0.10857	0.095	0.065	0.057857	0.065714	0.057143	0.068571	0.061429	0.057857	0.045	0.072857	0.095	0.083571	0.083571	0.090714	0.085714	0.068571	0.072143	0.085714	0.080714	0.077857	0.087143	0.080714	0.088571	0.10214	0.10214	0.085	0.054286	0.062143	0.082143	0.073571
0.070769	0.063846	0.073846	0.082308	0.073077	0.059231	0.082308	0.1	0.088462	0.11	0.10769	0.06	0.038462	0.11154	0.15846	0.10769	0.063846	0.075385	0.10538	0.095385	0.07	0.061538	0.075385	0.073077	0.052308	0.077692	0.072308	0.061538	0.046923	0.074615	0.096154	0.090769	0.087692	0.09	0.086923	0.073077	0.078462	0.089231	0.080769	0.082308	0.10538	0.091538	0.089231	0.10692	0.10154	0.082308	0.060769	0.073846	0.095385	0.091538
0.062	0.068	0.064	0.080667	0.087333	0.069333	0.05	0.058	0.084	0.081333	0.087333	0.097333	0.081333	0.048667	0.058667	0.13933	0.12533	0.054667	0.047333	0.088667	0.096	0.062	0.044	0.044	0.046	0.066667	0.079333	0.079333	0.057333	0.04	0.056667	0.080667	0.074	0.072667	0.08	0.076667	0.066667	0.057333	0.067333	0.07	0.073333	0.088	0.074667	0.072	0.094667	0.090667	0.066667	0.054667	0.061333	0.072667
0.090714	0.062857	0.061429	0.080714	0.10143	0.105	0.085	0.080714	0.087143	0.074286	0.074286	0.070714	0.06	0.068571	0.084286	0.087857	0.08	0.089286	0.087143	0.057143	0.042857	0.057857	0.078571	0.091429	0.065	0.07	0.052857	0.085	0.099286	0.072857	0.057143	0.059286	0.075714	0.087143	0.086429	0.10429	0.080714	0.041429	0.051429	0.10786	0.14	0.087143	0.045714	0.075714	0.11	0.092857	0.062143	0.055	0.052857	0.05
0.067857	0.07	0.058571	0.056429	0.080714	0.095	0.092857	0.081429	0.087857	0.089286	0.077143	0.08	0.081429	0.07	0.078571	0.091429	0.085	0.087857	0.091429	0.088571	0.061429	0.043571	0.062143	0.089286	0.087143	0.045	0.067857	0.061429	0.062143	0.087857	0.083571	0.064286	0.052857	0.085714	0.10643	0.093571	0.10571	0.11714	0.092857	0.060714	0.12071	0.15714	0.093571	0.052857	0.074286	0.098571	0.083571	0.060714	0.041429	0.045
0.069286	0.060714	0.052857	0.067857	0.099286	0.10857	0.08	0.074286	0.091429	0.077857	0.071429	0.075	0.072857	0.058571	0.072857	0.089286	0.079286	0.085714	0.087857	0.075	0.05	0.05	0.073571	0.095	0.083571	0.053571	0.062143	0.066429	0.082857	0.091429	0.07	0.055714	0.057857	0.086429	0.087857	0.085714	0.10286	0.097143	0.066429	0.054286	0.13286	0.14143	0.069286	0.051429	0.088571	0.105	0.078571	0.055714	0.053571	0.052143
0.064615	0.088462	0.09	0.076154	0.063077	0.075385	0.10385	0.11231	0.088462	0.082308	0.093846	0.085385	0.08	0.086923	0.078462	0.072308	0.086154	0.086923	0.080769	0.091538	0.096154	0.069231	0.046923	0.053846	0.085385	0.056154	0.049231	0.067692	0.077692	0.062308	0.058462	0.056923	0.073077	0.093077	0.09	0.11308	0.1	0.06	0.060769	0.11	0.15308	0.10692	0.058462	0.076923	0.11154	0.10462	0.073846	0.069231	0.085385	0.070769
0.090714	0.064286	0.063571	0.080714	0.098571	0.10214	0.085714	0.087143	0.09	0.076429	0.075	0.07	0.06	0.074286	0.086429	0.084286	0.077143	0.082143	0.085714	0.06	0.045714	0.062857	0.081429	0.095	0.066429	0.062857	0.052857	0.092143	0.10714	0.075	0.056429	0.065	0.083571	0.087857	0.088571	0.105	0.077857	0.04	0.062857	0.12571	0.13929	0.078571	0.048571	0.085714	0.10929	0.082143	0.057143	0.055714	0.048571	0.040714
0.10214	0.10714	0.16643	0.17714	0.095714	0.067143	0.065714	0.067857	0.071429	0.065	0.092143	0.085	0.044286	0.042143	0.074286	0.097857	0.062143	0.05	0.062857	0.076429	0.075714	0.094286	0.077857	0.030714	0.030714	0.08	0.087857	0.081429	0.071429	0.090714	0.050714	0.027857	0.049286	0.10929	0.14357	0.075714	0.063571	0.098571	0.11714	0.12071	0.094286	0.077143	0.074286	0.065714	0.065	0.073571	0.065	0.066429	0.082143	0.081429
0.055625	0.09375	0.11375	0.1025	0.14438	0.1475	0.075625	0.05375	0.058125	0.06375	0.065	0.063125	0.0625	0.080625	0.06875	0.038125	0.065625	0.07625	0.045	0.04125	0.055	0.07	0.06875	0.071875	0.05	0.08125	0.094375	0.0775	0.06875	0.074375	0.0375	0.03125	0.05375	0.11438	0.12375	0.06	0.065625	0.09	0.10875	0.105	0.07625	0.070625	0.0675	0.05875	0.061875	0.064375	0.05625	0.065	0.07375	0.049375
0.069375	0.09875	0.10437	0.11875	0.15063	0.10562	0.0675	0.06125	0.053125	0.0625	0.059375	0.0775	0.1025	0.084375	0.05	0.045625	0.07625	0.073125	0.055	0.068125	0.083125	0.081875	0.071875	0.056875	0.029375	0.11313	0.0575	0.089375	0.073125	0.06875	0.08125	0.038125	0.026875	0.05375	0.1	0.10812	0.060625	0.03875	0.066875	0.10562	0.1	0.070625	0.0625	0.063125	0.054375	0.059375	0.06375	0.05625	0.061875	0.075625
0.096552	0.10207	0.14345	0.17034	0.10483	0.067586	0.06069	0.05931	0.062759	0.063448	0.092414	0.086897	0.053793	0.045517	0.062759	0.084828	0.055862	0.042759	0.061379	0.082069	0.08069	0.093103	0.084138	0.034483	0.024828	0.090345	0.092414	0.073103	0.084138	0.066897	0.031724	0.042069	0.076552	0.13241	0.10897	0.063448	0.091724	0.10759	0.11793	0.10552	0.074483	0.071034	0.065517	0.058621	0.071034	0.069655	0.05931	0.071034	0.089655	0.05931
0.046875	0.083125	0.11	0.1175	0.15375	0.12062	0.064375	0.056875	0.05375	0.066875	0.063125	0.06375	0.07625	0.06625	0.046875	0.05125	0.075	0.058125	0.03625	0.05	0.06375	0.0725	0.0775	0.085625	0.06	0.089375	0.08625	0.06375	0.076875	0.06	0.034375	0.04125	0.07375	0.12562	0.088125	0.04625	0.088125	0.10875	0.11188	0.086875	0.060625	0.064375	0.060625	0.0575	0.064375	0.064375	0.066875	0.079375	0.085	0.05625
0.0608	0.0448	0.04	0.0912	0.152	0.1248	0.0744	0.0624	0.0752	0.0824	0.0744	0.0768	0.0832	0.0856	0.0792	0.0768	0.0904	0.112	0.0792	0.0664	0.108	0.0864	0.0536	0.0344	0.0304	0.1048	0.0968	0.0928	0.0808	0.0784	0.0656	0.0744	0.0752	0.0552	0.0648	0.0904	0.0728	0.0416	0.0504	0.072	0.1	0.0928	0.1152	0.1152	0.0616	0.0472	0.0432	0.0432	0.052	0.072
0.048	0.0296	0.0344	0.0872	0.1296	0.104	0.072	0.0696	0.08	0.0784	0.0704	0.0832	0.0928	0.0896	0.0808	0.0728	0.0864	0.1032	0.068	0.0888	0.1344	0.092	0.052	0.0264	0.0392	0.116	0.0584	0.06	0.0792	0.0856	0.0888	0.068	0.0688	0.0688	0.0512	0.0632	0.0904	0.0992	0.0704	0.0504	0.076	0.092	0.0872	0.108	0.1152	0.0752	0.0488	0.0472	0.0464	0.0576
0.0392	0.032	0.1128	0.1624	0.1048	0.0664	0.0632	0.0704	0.0784	0.0704	0.0776	0.088	0.0816	0.072	0.0624	0.0904	0.1152	0.0768	0.0664	0.1048	0.0864	0.056	0.04	0.0288	0.0312	0.0848	0.0712	0.0832	0.0864	0.0776	0.072	0.0728	0.0608	0.0512	0.0752	0.084	0.0568	0.0432	0.064	0.0864	0.088	0.0928	0.128	0.1	0.0512	0.0512	0.048	0.0488	0.0464	0.064
0.037143	0.029286	0.087857	0.12714	0.087143	0.055	0.052857	0.059286	0.065	0.060714	0.067143	0.072857	0.064286	0.07	0.067143	0.08	0.095714	0.062857	0.073571	0.12643	0.093571	0.046429	0.027143	0.038571	0.049286	0.099286	0.057143	0.054286	0.067857	0.072857	0.072143	0.067143	0.071429	0.06	0.042857	0.066429	0.081429	0.071429	0.054286	0.048571	0.07	0.077143	0.075	0.10429	0.09	0.05	0.047143	0.045	0.045	0.055
0.05	0.042857	0.035	0.065	0.11143	0.10071	0.059286	0.052857	0.065714	0.069286	0.063571	0.064286	0.068571	0.072857	0.072857	0.064286	0.076429	0.096429	0.07	0.069286	0.11714	0.10214	0.057143	0.029286	0.034286	0.10571	0.065714	0.068571	0.072857	0.072857	0.076429	0.061429	0.06	0.060714	0.05	0.062857	0.080714	0.081429	0.06	0.045714	0.067857	0.087857	0.081429	0.097143	0.098571	0.057857	0.040714	0.04	0.036429	0.045714
0.042857	0.035238	0.075238	0.090476	0.059048	0.048571	0.061905	0.062857	0.073333	0.091429	0.098095	0.10286	0.10286	0.093333	0.074286	0.066667	0.066667	0.068571	0.093333	0.11429	0.078095	0.044762	0.057143	0.06381	0.04381	0.077143	0.084762	0.078095	0.074286	0.059048	0.046667	0.034286	0.030476	0.067619	0.094286	0.09619	0.082857	0.064762	0.077143	0.088571	0.10857	0.11048	0.081905	0.059048	0.05619	0.070476	0.065714	0.050476	0.057143	0.051429
0.05	0.056364	0.086364	0.08	0.042727	0.043636	0.058182	0.061818	0.074545	0.093636	0.099091	0.096364	0.090909	0.083636	0.069091	0.065455	0.066364	0.076364	0.091818	0.077273	0.05	0.044545	0.053636	0.049091	0.032727	0.078182	0.080909	0.066364	0.067273	0.057273	0.044545	0.039091	0.043636	0.076364	0.090909	0.076364	0.074545	0.076364	0.081818	0.085455	0.1	0.097273	0.062727	0.043636	0.050909	0.057273	0.051818	0.052727	0.062727	0.051818
0.033571	0.035	0.06	0.053571	0.034286	0.039286	0.05	0.052857	0.062143	0.072143	0.072857	0.075714	0.072857	0.061429	0.050714	0.056429	0.053571	0.055	0.070714	0.077143	0.051429	0.035714	0.047143	0.048571	0.039286	0.061429	0.057857	0.062857	0.057857	0.051429	0.040714	0.034286	0.027857	0.035714	0.060714	0.073571	0.065	0.055714	0.059286	0.057857	0.063571	0.077143	0.072857	0.050714	0.034286	0.045	0.052143	0.045714	0.045714	0.038571
0.043478	0.053913	0.066957	0.048696	0.044348	0.056522	0.06	0.062609	0.083478	0.089565	0.086087	0.083478	0.073043	0.064348	0.058261	0.064348	0.063478	0.093043	0.098261	0.053043	0.046957	0.06087	0.048696	0.035652	0.033043	0.068696	0.077391	0.070435	0.064348	0.055652	0.042609	0.036522	0.04087	0.071304	0.089565	0.082609	0.076522	0.067826	0.073913	0.075652	0.086957	0.093043	0.070435	0.045217	0.044348	0.053043	0.064348	0.057391	0.029565	0.026087
0.037273	0.051818	0.081818	0.068182	0.04	0.043636	0.054545	0.07	0.085455	0.086364	0.088182	0.090909	0.083636	0.071818	0.06	0.072727	0.073636	0.08	0.085455	0.064545	0.056364	0.067273	0.065455	0.059091	0.059091	0.08	0.063636	0.055455	0.076364	0.072727	0.062727	0.055455	0.043636	0.035455	0.034545	0.067273	0.090909	0.083636	0.087273	0.08	0.076364	0.083636	0.093636	0.097273	0.076364	0.05	0.045455	0.057273	0.058182	0.052727
0.052727	0.034545	0.047273	0.084545	0.10818	0.1	0.087273	0.074545	0.074545	0.083636	0.091818	0.072727	0.041818	0.034545	0.036364	0.050909	0.056364	0.069091	0.076364	0.074545	0.065455	0.075455	0.10636	0.086364	0.043636	0.051818	0.074545	0.047273	0.044545	0.061818	0.062727	0.067273	0.08	0.089091	0.092727	0.086364	0.070909	0.06	0.067273	0.068182	0.068182	0.085455	0.086364	0.064545	0.067273	0.09	0.08	0.060909	0.06	0.064545
0.040741	0.031852	0.033333	0.037037	0.059259	0.078519	0.080741	0.073333	0.065185	0.062222	0.068148	0.073333	0.072593	0.06	0.037037	0.036296	0.042963	0.044444	0.04963	0.057778	0.056296	0.045926	0.053333	0.075556	0.065926	0.038519	0.053333	0.04	0.036296	0.043704	0.046667	0.055556	0.067407	0.076296	0.076296	0.072593	0.057037	0.041481	0.047407	0.054074	0.057778	0.068889	0.074074	0.059259	0.05037	0.062963	0.057037	0.045185	0.05037	0.051111
0.04	0.050476	0.051429	0.03619	0.052381	0.077143	0.098095	0.099048	0.086667	0.074286	0.08	0.087619	0.08	0.08381	0.06381	0.039048	0.045714	0.055238	0.06	0.067619	0.070476	0.071429	0.066667	0.07619	0.089524	0.067619	0.052381	0.044762	0.051429	0.061905	0.074286	0.086667	0.087619	0.094286	0.1	0.079048	0.059048	0.049524	0.062857	0.069524	0.075238	0.08381	0.068571	0.061905	0.073333	0.066667	0.05619	0.061905	0.04381	0.041905
0.053913	0.044348	0.044348	0.066087	0.092174	0.091304	0.078261	0.070435	0.066087	0.072174	0.093043	0.076522	0.041739	0.035652	0.037391	0.044348	0.044348	0.057391	0.065217	0.064348	0.055652	0.054783	0.087826	0.086087	0.045217	0.04087	0.058261	0.03913	0.034783	0.049565	0.06	0.064348	0.073913	0.085217	0.082609	0.075652	0.066957	0.05913	0.062609	0.062609	0.061739	0.078261	0.088696	0.067826	0.055652	0.073913	0.076522	0.061739	0.055652	0.055652
0.045217	0.042609	0.04087	0.06087	0.094783	0.10174	0.081739	0.067826	0.064348	0.068696	0.089565	0.076522	0.045217	0.03913	0.036522	0.044348	0.046087	0.054783	0.063478	0.070435	0.067826	0.053043	0.083478	0.098261	0.054783	0.045217	0.062609	0.04	0.04	0.052174	0.06	0.066087	0.072174	0.077391	0.077391	0.077391	0.069565	0.06087	0.061739	0.067826	0.075652	0.081739	0.08	0.063478	0.056522	0.073043	0.073043	0.06	0.057391	0.056522
0.052222	0.072222	0.054444	0.054444	0.078889	0.097778	0.088889	0.075556	0.075556	0.085556	0.074444	0.071111	0.082222	0.093333	0.11667	0.11	0.086667	0.088889	0.088889	0.098889	0.12444	0.13	0.074444	0.046667	0.072222	0.072222	0.078889	0.076667	0.061111	0.073333	0.095556	0.077778	0.075556	0.096667	0.082222	0.061111	0.076667	0.086667	0.093333	0.11667	0.13333	0.10444	0.093333	0.11	0.096667	0.074444	0.07	0.074444	0.047778	0.047778
0.033333	0.063333	0.056667	0.052222	0.077778	0.095556	0.081111	0.065556	0.075556	0.086667	0.078889	0.074444	0.075556	0.092222	0.12778	0.11	0.074444	0.084444	0.091111	0.11111	0.13111	0.12444	0.067778	0.038889	0.065556	0.036667	0.045556	0.058889	0.082222	0.066667	0.062222	0.095556	0.095556	0.08	0.093333	0.085556	0.063333	0.062222	0.07	0.082222	0.11667	0.14	0.10444	0.078889	0.10778	0.10444	0.084444	0.076667	0.071111	0.062222
0.032	0.05	0.05	0.054	0.074	0.083	0.068	0.059	0.062	0.07	0.073	0.07	0.068	0.086	0.116	0.099	0.069	0.073	0.079	0.1	0.121	0.118	0.067	0.042	0.063	0.045	0.052	0.056	0.061	0.05	0.047	0.081	0.095	0.071	0.079	0.085	0.056	0.04	0.048	0.068	0.104	0.128	0.101	0.068	0.088	0.096	0.078	0.07	0.077	0.07
0.031	0.042	0.048	0.055	0.079	0.087	0.068	0.066	0.071	0.069	0.063	0.068	0.076	0.086	0.113	0.097	0.074	0.076	0.075	0.101	0.107	0.083	0.053	0.049	0.061	0.052	0.057	0.063	0.055	0.057	0.081	0.076	0.063	0.092	0.08	0.051	0.065	0.068	0.081	0.099	0.118	0.097	0.071	0.088	0.083	0.074	0.065	0.057	0.044	0.041
0.032	0.037	0.052	0.072	0.097	0.088	0.067	0.061	0.064	0.067	0.065	0.071	0.074	0.103	0.103	0.069	0.073	0.077	0.08	0.113	0.118	0.061	0.051	0.085	0.064	0.065	0.072	0.064	0.056	0.082	0.092	0.066	0.072	0.081	0.06	0.057	0.073	0.08	0.093	0.116	0.1	0.076	0.094	0.089	0.076	0.07	0.059	0.053	0.035	0.044
0.08	0.084706	0.097647	0.11529	0.096471	0.11294	0.14941	0.12588	0.087059	0.077647	0.074118	0.097647	0.11765	0.10353	0.081176	0.095294	0.10941	0.078824	0.074118	0.10118	0.083529	0.057647	0.065882	0.077647	0.071765	0.048235	0.069412	0.10235	0.098824	0.076471	0.084706	0.10353	0.088235	0.081176	0.098824	0.12471	0.12706	0.10353	0.097647	0.1	0.096471	0.097647	0.12824	0.12941	0.089412	0.081176	0.090588	0.077647	0.061176	0.055294
0.065714	0.073333	0.08	0.087619	0.08381	0.09619	0.11905	0.10476	0.075238	0.066667	0.058095	0.072381	0.091429	0.08381	0.065714	0.075238	0.082857	0.05619	0.06	0.080952	0.068571	0.053333	0.052381	0.058095	0.05619	0.054286	0.078095	0.088571	0.070476	0.061905	0.07619	0.078095	0.066667	0.073333	0.084762	0.10571	0.095238	0.064762	0.074286	0.07619	0.075238	0.089524	0.10095	0.08381	0.062857	0.074286	0.072381	0.049524	0.042857	0.045714
0.065263	0.056842	0.075789	0.093684	0.10421	0.087368	0.094737	0.12421	0.11158	0.090526	0.076842	0.057895	0.050526	0.073684	0.090526	0.072632	0.070526	0.091579	0.074737	0.057895	0.073684	0.071579	0.053684	0.043158	0.06	0.033684	0.043158	0.050526	0.072632	0.097895	0.088421	0.067368	0.070526	0.086316	0.076842	0.067368	0.081053	0.086316	0.11474	0.10842	0.078947	0.084211	0.083158	0.090526	0.11474	0.11684	0.074737	0.061053	0.076842	0.069474
0.066316	0.090526	0.093684	0.1	0.092632	0.097895	0.12947	0.12316	0.090526	0.077895	0.063158	0.072632	0.086316	0.090526	0.074737	0.070526	0.087368	0.066316	0.055789	0.086316	0.084211	0.055789	0.051579	0.065263	0.070526	0.055789	0.081053	0.096842	0.089474	0.076842	0.086316	0.091579	0.072632	0.067368	0.081053	0.10737	0.10316	0.073684	0.082105	0.089474	0.087368	0.093684	0.11263	0.10316	0.068421	0.068421	0.074737	0.062105	0.055789	0.053684
0.068889	0.067778	0.085556	0.095556	0.097778	0.082222	0.11444	0.14111	0.10889	0.077778	0.067778	0.063333	0.062222	0.088889	0.1	0.075556	0.08	0.09	0.063333	0.066667	0.09	0.076667	0.063333	0.06	0.067778	0.056667	0.077778	0.1	0.095556	0.074444	0.082222	0.098889	0.083333	0.065556	0.08	0.12333	0.11	0.064444	0.075556	0.092222	0.091111	0.095556	0.12222	0.11444	0.068889	0.063333	0.081111	0.071111	0.056667	0.051111
0.059259	0.073333	0.059259	0.053333	0.065926	0.074074	0.065926	0.051852	0.041481	0.052593	0.058519	0.055556	0.057778	0.066667	0.06963	0.066667	0.065185	0.082222	0.080741	0.045926	0.031111	0.037037	0.039259	0.032593	0.032593	0.091111	0.083704	0.086667	0.06963	0.047407	0.041481	0.037037	0.035556	0.042222	0.046667	0.04963	0.053333	0.051852	0.040741	0.031852	0.054074	0.06	0.034074	0.036296	0.068889	0.068148	0.053333	0.072593	0.068148	0.048889
0.038519	0.047407	0.047407	0.043704	0.055556	0.071111	0.068148	0.057778	0.05037	0.054074	0.057037	0.056296	0.057778	0.060741	0.062222	0.06	0.059259	0.073333	0.099259	0.077037	0.041481	0.040741	0.037778	0.032593	0.03037	0.071111	0.084444	0.084444	0.082222	0.071852	0.055556	0.043704	0.035556	0.036296	0.041481	0.045926	0.045926	0.042963	0.052593	0.04963	0.034074	0.043704	0.06	0.045185	0.03037	0.053333	0.071111	0.056296	0.056296	0.053333
0.0248	0.0304	0.048	0.0632	0.0608	0.06	0.072	0.0752	0.068	0.052	0.0456	0.0632	0.072	0.0624	0.056	0.0632	0.0648	0.0624	0.0664	0.0968	0.096	0.048	0.032	0.0448	0.0392	0.0848	0.0752	0.0824	0.0824	0.0576	0.048	0.0416	0.0424	0.0472	0.0432	0.0384	0.0512	0.0624	0.0512	0.0352	0.0408	0.0544	0.048	0.0376	0.0592	0.0768	0.0576	0.064	0.0808	0.0584
0.026154	0.04	0.06	0.053077	0.05	0.061538	0.071538	0.068462	0.056923	0.046923	0.056154	0.063077	0.055385	0.06	0.060769	0.064615	0.068462	0.061538	0.072308	0.090769	0.067692	0.033077	0.034615	0.036923	0.028462	0.08	0.066923	0.078462	0.068462	0.051538	0.044615	0.040769	0.039231	0.043846	0.04	0.04	0.053846	0.056923	0.045385	0.031538	0.048462	0.062308	0.042308	0.036923	0.065385	0.069231	0.051538	0.068462	0.068462	0.049231
0.022581	0.025806	0.039355	0.04129	0.03871	0.04129	0.058065	0.064516	0.053548	0.047742	0.049677	0.050968	0.046452	0.050323	0.050968	0.054194	0.056129	0.054194	0.065806	0.096129	0.075484	0.031613	0.034194	0.035484	0.029032	0.069677	0.076129	0.073548	0.071613	0.056129	0.043226	0.034839	0.029032	0.034839	0.042581	0.038065	0.036774	0.04129	0.048387	0.043226	0.028387	0.039355	0.055484	0.043226	0.031613	0.047742	0.056129	0.045161	0.050968	0.050323
0.048182	0.045455	0.056364	0.049091	0.054545	0.08	0.075455	0.057273	0.073636	0.075455	0.054545	0.061818	0.067273	0.076364	0.097273	0.11636	0.087273	0.065455	0.087273	0.081818	0.070909	0.060909	0.055455	0.047273	0.038182	0.053636	0.051818	0.04	0.057273	0.10909	0.10364	0.072727	0.065455	0.066364	0.069091	0.097273	0.097273	0.076364	0.07	0.063636	0.072727	0.072727	0.060909	0.064545	0.080909	0.078182	0.059091	0.042727	0.037273	0.033636
0.054444	0.062222	0.063333	0.071111	0.098889	0.096667	0.084444	0.1	0.09	0.061111	0.074444	0.09	0.086667	0.11556	0.13889	0.10667	0.082222	0.10444	0.1	0.083333	0.076667	0.064444	0.047778	0.032222	0.052222	0.064444	0.075556	0.05	0.053333	0.11111	0.12556	0.10667	0.088889	0.075556	0.068889	0.11667	0.13	0.095556	0.092222	0.074444	0.074444	0.082222	0.07	0.07	0.10333	0.11222	0.08	0.063333	0.047778	0.032222
0.04381	0.051429	0.053333	0.049524	0.084762	0.089524	0.068571	0.08381	0.070476	0.052381	0.061905	0.071429	0.07619	0.098095	0.11905	0.091429	0.067619	0.092381	0.094286	0.08	0.068571	0.061905	0.047619	0.025714	0.051429	0.064762	0.059048	0.054286	0.073333	0.10286	0.09619	0.074286	0.070476	0.06	0.080952	0.10667	0.089524	0.07619	0.071429	0.069524	0.068571	0.061905	0.061905	0.071429	0.089524	0.080952	0.05619	0.050476	0.051429	0.034286
0.046316	0.056842	0.058947	0.050526	0.068421	0.090526	0.082105	0.087368	0.083158	0.064211	0.067368	0.076842	0.075789	0.095789	0.12737	0.11368	0.081053	0.094737	0.096842	0.077895	0.066316	0.066316	0.062105	0.035789	0.054737	0.045263	0.034737	0.089474	0.12105	0.10316	0.086316	0.081053	0.069474	0.097895	0.12105	0.095789	0.078947	0.069474	0.073684	0.071579	0.06	0.055789	0.082105	0.10421	0.083158	0.058947	0.049474	0.054737	0.06	0.04
0.042857	0.054286	0.054286	0.046667	0.072381	0.094286	0.070476	0.070476	0.078095	0.062857	0.060952	0.071429	0.074286	0.087619	0.11333	0.10762	0.08	0.089524	0.092381	0.077143	0.06381	0.05619	0.054286	0.032381	0.047619	0.065714	0.030476	0.06	0.10381	0.099048	0.084762	0.080952	0.068571	0.072381	0.1	0.09619	0.08	0.074286	0.074286	0.075238	0.068571	0.059048	0.065714	0.081905	0.084762	0.060952	0.040952	0.049524	0.055238	0.029524
0.0208	0.0264	0.0408	0.0448	0.0424	0.0328	0.0632	0.0736	0.0464	0.0592	0.0768	0.0712	0.0608	0.0568	0.056	0.0496	0.0376	0.0576	0.0736	0.0512	0.0448	0.0704	0.0808	0.0512	0.0288	0.0656	0.0496	0.048	0.052	0.06	0.0432	0.0304	0.0376	0.04	0.0336	0.0288	0.0216	0.016	0.0248	0.036	0.0336	0.0608	0.1032	0.0896	0.0552	0.0536	0.0696	0.0648	0.0536	0.0568
0.044	0.0432	0.0472	0.0504	0.0456	0.0672	0.0792	0.0528	0.0512	0.0688	0.072	0.0576	0.0448	0.0472	0.0448	0.0368	0.048	0.0688	0.0592	0.0592	0.0552	0.0384	0.0352	0.0248	0.0264	0.06	0.0552	0.0656	0.0488	0.0368	0.0424	0.04	0.0312	0.0304	0.028	0.0248	0.0376	0.0464	0.0384	0.0536	0.096	0.0896	0.0592	0.0592	0.0688	0.0624	0.052	0.0496	0.04	0.0352
0.029167	0.025	0.0525	0.055833	0.039167	0.041667	0.046667	0.070833	0.069167	0.05	0.059167	0.07	0.075	0.065833	0.058333	0.056667	0.0475	0.044167	0.0625	0.0675	0.0525	0.06	0.074167	0.064167	0.044167	0.063333	0.051667	0.060833	0.07	0.059167	0.0425	0.036667	0.039167	0.035833	0.031667	0.030833	0.0225	0.016667	0.025833	0.025833	0.0425	0.0875	0.0975	0.074167	0.054167	0.058333	0.0675	0.06	0.061667	0.071667
0.03619	0.053333	0.053333	0.054286	0.051429	0.048571	0.089524	0.08381	0.046667	0.061905	0.089524	0.082857	0.060952	0.06381	0.059048	0.045714	0.049524	0.079048	0.073333	0.060952	0.075238	0.059048	0.04381	0.03619	0.031429	0.062857	0.055238	0.067619	0.069524	0.049524	0.04381	0.051429	0.049524	0.03619	0.030476	0.022857	0.029524	0.04	0.039048	0.03619	0.079048	0.11429	0.091429	0.070476	0.070476	0.075238	0.066667	0.064762	0.065714	0.058095
0.027273	0.034545	0.059091	0.056364	0.05	0.055455	0.050909	0.073636	0.072727	0.054545	0.062727	0.075455	0.083636	0.070909	0.058182	0.056364	0.043636	0.041818	0.067273	0.077273	0.06	0.069091	0.081818	0.06	0.041818	0.074545	0.058182	0.062727	0.070909	0.05	0.035455	0.038182	0.041818	0.038182	0.030909	0.026364	0.024545	0.027273	0.032727	0.027273	0.057273	0.10182	0.093636	0.072727	0.07	0.081818	0.080909	0.068182	0.062727	0.061818
0.087273	0.083636	0.054545	0.055455	0.060909	0.059091	0.043636	0.043636	0.075455	0.093636	0.087273	0.075455	0.067273	0.077273	0.08	0.088182	0.086364	0.061818	0.049091	0.054545	0.062727	0.054545	0.048182	0.045455	0.043636	0.056364	0.090909	0.11	0.080909	0.072727	0.07	0.062727	0.078182	0.093636	0.090909	0.087273	0.076364	0.061818	0.066364	0.065455	0.051818	0.045455	0.074545	0.075455	0.037273	0.032727	0.06	0.050909	0.021818	0.029091
0.083158	0.086316	0.083158	0.078947	0.057895	0.049474	0.044211	0.042105	0.084211	0.11474	0.10421	0.098947	0.096842	0.093684	0.091579	0.10842	0.10211	0.075789	0.058947	0.058947	0.066316	0.067368	0.067368	0.063158	0.054737	0.066316	0.064211	0.057895	0.083158	0.11263	0.092632	0.076842	0.078947	0.08	0.091579	0.10947	0.11158	0.10316	0.11053	0.098947	0.074737	0.066316	0.062105	0.054737	0.085263	0.092632	0.048421	0.036842	0.055789	0.042105
0.068571	0.057143	0.058095	0.052381	0.045714	0.03619	0.044762	0.075238	0.099048	0.085714	0.077143	0.081905	0.074286	0.087619	0.10476	0.097143	0.07619	0.058095	0.05619	0.062857	0.06	0.055238	0.060952	0.060952	0.047619	0.049524	0.047619	0.045714	0.06381	0.098095	0.087619	0.06381	0.074286	0.077143	0.085714	0.097143	0.099048	0.099048	0.098095	0.08	0.067619	0.064762	0.053333	0.049524	0.071429	0.077143	0.046667	0.037143	0.061905	0.046667
0.084167	0.0875	0.063333	0.059167	0.054167	0.044167	0.035	0.0325	0.059167	0.08	0.08	0.070833	0.06	0.0725	0.080833	0.090833	0.09	0.063333	0.045	0.045	0.056667	0.056667	0.049167	0.045833	0.043333	0.0625	0.05	0.088333	0.099167	0.068333	0.063333	0.0625	0.056667	0.07	0.086667	0.093333	0.084167	0.073333	0.0675	0.060833	0.055833	0.0475	0.048333	0.066667	0.070833	0.043333	0.030833	0.046667	0.044167	0.024167
0.052857	0.050714	0.045	0.041429	0.037857	0.031429	0.047143	0.067143	0.08	0.067857	0.06	0.064286	0.057143	0.067143	0.070714	0.06	0.047857	0.042857	0.051429	0.048571	0.035714	0.040714	0.047143	0.043571	0.039286	0.039286	0.039286	0.075	0.073571	0.055	0.061429	0.059286	0.068571	0.080714	0.080714	0.074286	0.061429	0.051429	0.059286	0.058571	0.042857	0.035714	0.051429	0.054286	0.033571	0.024286	0.047857	0.044286	0.013571	0.017143
0.041739	0.05913	0.073043	0.07913	0.085217	0.072174	0.068696	0.088696	0.075652	0.052174	0.066957	0.073913	0.066087	0.075652	0.086957	0.093913	0.090435	0.092174	0.09913	0.1	0.09913	0.09913	0.083478	0.063478	0.066087	0.048696	0.04087	0.049565	0.064348	0.08087	0.073043	0.057391	0.065217	0.093913	0.10261	0.089565	0.088696	0.090435	0.10522	0.095652	0.052174	0.049565	0.082609	0.085217	0.08087	0.10696	0.12348	0.090435	0.062609	0.076522
0.070323	0.056129	0.069032	0.054194	0.05871	0.067097	0.044516	0.034194	0.049032	0.054839	0.056774	0.063871	0.065806	0.068387	0.066452	0.073548	0.075484	0.075484	0.077419	0.072258	0.059355	0.052903	0.059355	0.053548	0.043871	0.054839	0.04129	0.049677	0.057419	0.059355	0.045161	0.040645	0.056129	0.077419	0.074194	0.065161	0.076774	0.082581	0.079355	0.060645	0.041935	0.047742	0.062581	0.063871	0.070323	0.08	0.07871	0.074839	0.05871	0.047742
0.070667	0.056667	0.066	0.052	0.061333	0.072667	0.054667	0.039333	0.050667	0.055333	0.052	0.067333	0.077333	0.074667	0.067333	0.072	0.075333	0.076	0.078667	0.082	0.074667	0.059333	0.052667	0.054	0.052	0.068	0.066	0.061333	0.056	0.057333	0.047333	0.046667	0.062	0.078667	0.074667	0.069333	0.077333	0.078667	0.074	0.048	0.036667	0.056	0.066667	0.062	0.076667	0.088667	0.07	0.064	0.06	0.055333
0.078	0.079	0.086	0.097	0.085	0.087	0.106	0.079	0.053	0.07	0.073	0.073	0.08	0.093	0.103	0.1	0.107	0.114	0.11	0.112	0.112	0.097	0.084	0.081	0.071	0.076	0.051	0.074	0.082	0.074	0.063	0.063	0.08	0.11	0.12	0.107	0.109	0.112	0.122	0.099	0.055	0.062	0.099	0.097	0.091	0.125	0.127	0.087	0.073	0.078
0.046667	0.073333	0.078333	0.078333	0.073333	0.073333	0.0875	0.078333	0.044167	0.06	0.075	0.064167	0.065	0.078333	0.085	0.0825	0.0875	0.0925	0.093333	0.091667	0.090833	0.076667	0.056667	0.061667	0.070833	0.05	0.051667	0.041667	0.055	0.0775	0.0675	0.054167	0.049167	0.0575	0.083333	0.10083	0.09	0.076667	0.088333	0.099167	0.0975	0.065833	0.045	0.07	0.085833	0.075	0.099167	0.12	0.085	0.071667
0.079259	0.077037	0.071111	0.059259	0.062222	0.058519	0.052593	0.059259	0.057037	0.054074	0.052593	0.048148	0.041481	0.057037	0.082963	0.091852	0.078519	0.080741	0.079259	0.063704	0.048889	0.048889	0.062963	0.06	0.048889	0.051852	0.057778	0.080741	0.073333	0.077037	0.082222	0.06963	0.067407	0.074074	0.078519	0.076296	0.074815	0.074074	0.075556	0.072593	0.077037	0.074074	0.057778	0.054074	0.054074	0.045185	0.035556	0.048148	0.058519	0.036296
0.067273	0.057273	0.065455	0.078182	0.081818	0.069091	0.073636	0.077273	0.066364	0.064545	0.060909	0.064545	0.069091	0.095455	0.11909	0.10636	0.1	0.11364	0.10364	0.060909	0.049091	0.08	0.089091	0.068182	0.067273	0.071818	0.078182	0.10273	0.10273	0.094545	0.087273	0.093636	0.10545	0.09	0.083636	0.086364	0.085455	0.085455	0.098182	0.096364	0.069091	0.060909	0.073636	0.06	0.042727	0.070909	0.085455	0.067273	0.062727	0.040909
0.112	0.106	0.082	0.083	0.084	0.066	0.075	0.08	0.072	0.073	0.076	0.082	0.082	0.111	0.137	0.119	0.107	0.119	0.108	0.061	0.06	0.095	0.097	0.076	0.065	0.07	0.06	0.096	0.106	0.103	0.097	0.103	0.11	0.108	0.112	0.104	0.102	0.108	0.104	0.099	0.107	0.091	0.067	0.078	0.077	0.053	0.057	0.089	0.093	0.068
0.079167	0.065833	0.069167	0.073333	0.055	0.055	0.0675	0.065833	0.066667	0.061667	0.056667	0.076667	0.093333	0.11167	0.10417	0.089167	0.10333	0.098333	0.064167	0.0475	0.0725	0.08	0.068333	0.08	0.069167	0.063333	0.0475	0.0625	0.0875	0.094167	0.078333	0.0825	0.090833	0.0875	0.086667	0.086667	0.090833	0.093333	0.088333	0.081667	0.085833	0.070833	0.055	0.0675	0.055	0.04	0.063333	0.080833	0.0725	0.058333
0.071429	0.050476	0.074286	0.078095	0.071429	0.082857	0.08	0.073333	0.07619	0.066667	0.071429	0.10381	0.11429	0.11524	0.10095	0.1019	0.10476	0.087619	0.069524	0.070476	0.080952	0.078095	0.082857	0.08381	0.05619	0.049524	0.041905	0.044762	0.065714	0.094286	0.095238	0.080952	0.08	0.099048	0.10476	0.1019	0.10381	0.097143	0.10571	0.1019	0.097143	0.1	0.07619	0.06	0.071429	0.064762	0.044762	0.065714	0.094286	0.085714
0.071304	0.068696	0.085217	0.086957	0.086087	0.069565	0.073913	0.093913	0.072174	0.042609	0.066087	0.078261	0.064348	0.064348	0.073043	0.090435	0.095652	0.10435	0.10435	0.091304	0.09913	0.1087	0.093913	0.073913	0.065217	0.07913	0.065217	0.067826	0.073913	0.066957	0.055652	0.078261	0.10435	0.096522	0.093913	0.1087	0.10609	0.090435	0.06087	0.042609	0.076522	0.092174	0.086087	0.1	0.11826	0.092174	0.056522	0.069565	0.087826	0.07913
0.0472	0.0608	0.0824	0.08	0.0768	0.0832	0.0648	0.0632	0.0904	0.0728	0.0384	0.0568	0.0752	0.0696	0.0648	0.0752	0.0856	0.0888	0.0872	0.0928	0.0952	0.0896	0.0928	0.084	0.0576	0.0536	0.0568	0.0632	0.06	0.0472	0.0488	0.0704	0.088	0.0864	0.0816	0.0888	0.0936	0.0896	0.0768	0.0496	0.0512	0.0768	0.0816	0.0808	0.1048	0.1064	0.0784	0.072	0.0744	0.0808
0.037391	0.047826	0.072174	0.092174	0.087826	0.085217	0.086957	0.071304	0.081739	0.093043	0.063478	0.050435	0.05913	0.069565	0.068696	0.069565	0.087826	0.093913	0.089565	0.098261	0.09913	0.10348	0.10522	0.093043	0.071304	0.042609	0.045217	0.057391	0.05913	0.063478	0.057391	0.062609	0.086087	0.1087	0.098261	0.085217	0.096522	0.10261	0.098261	0.066957	0.047826	0.068696	0.084348	0.082609	0.1	0.12	0.10261	0.078261	0.07913	0.093043
0.056364	0.075455	0.093636	0.10182	0.091818	0.088182	0.077273	0.068182	0.099091	0.098182	0.053636	0.062727	0.081818	0.083636	0.074545	0.075455	0.097273	0.10727	0.097273	0.10273	0.10364	0.10182	0.10455	0.096364	0.072727	0.064545	0.064545	0.076364	0.065455	0.060909	0.075455	0.1	0.10091	0.094545	0.10091	0.10909	0.1	0.081818	0.055455	0.045455	0.084545	0.095455	0.084545	0.1	0.11636	0.095455	0.079091	0.097273	0.099091	0.082727
0.062609	0.093913	0.092174	0.096522	0.096522	0.086087	0.078261	0.066957	0.074783	0.089565	0.073913	0.052174	0.046957	0.065217	0.071304	0.066957	0.077391	0.086087	0.094783	0.098261	0.085217	0.083478	0.094783	0.086957	0.078261	0.050435	0.043478	0.063478	0.062609	0.067826	0.088696	0.10435	0.095652	0.093913	0.10609	0.1	0.066957	0.041739	0.050435	0.068696	0.07913	0.076522	0.096522	0.11304	0.090435	0.072174	0.084348	0.094783	0.087826	0.077391
0.092727	0.069091	0.094545	0.12727	0.14	0.12182	0.12364	0.14727	0.12364	0.098182	0.10909	0.11455	0.10909	0.14364	0.14727	0.11636	0.15636	0.15818	0.11091	0.11273	0.10909	0.085455	0.11273	0.13636	0.11091	0.11273	0.12182	0.12	0.11091	0.11091	0.11455	0.12	0.11818	0.13273	0.14	0.12727	0.10364	0.069091	0.087273	0.13636	0.14727	0.098182	0.085455	0.12909	0.16727	0.15636	0.12364	0.11636	0.10727	0.090909
0.070667	0.064	0.089333	0.085333	0.072	0.068	0.088	0.085333	0.078667	0.098667	0.1	0.093333	0.090667	0.086667	0.090667	0.128	0.11733	0.073333	0.084	0.086667	0.077333	0.093333	0.10133	0.096	0.070667	0.082667	0.077333	0.090667	0.081333	0.082667	0.090667	0.084	0.074667	0.089333	0.097333	0.085333	0.08	0.074667	0.065333	0.076	0.11067	0.094667	0.053333	0.073333	0.12	0.12267	0.108	0.097333	0.084	0.069333
0.082	0.096	0.104	0.11	0.152	0.136	0.108	0.144	0.15	0.106	0.11	0.142	0.144	0.142	0.134	0.108	0.154	0.184	0.124	0.102	0.11	0.098	0.15	0.206	0.152	0.126	0.12	0.128	0.13	0.128	0.12	0.12	0.126	0.132	0.142	0.152	0.144	0.124	0.126	0.104	0.116	0.16	0.136	0.096	0.118	0.154	0.17	0.156	0.122	0.084
0.075385	0.067692	0.081538	0.10154	0.1	0.083077	0.10154	0.12	0.087692	0.081538	0.11538	0.11846	0.10462	0.11385	0.10462	0.12462	0.14	0.10615	0.081538	0.070769	0.070769	0.10769	0.13538	0.093846	0.084615	0.087692	0.081538	0.090769	0.083077	0.096923	0.10462	0.095385	0.095385	0.086154	0.10462	0.12462	0.10769	0.098462	0.076923	0.064615	0.11385	0.13077	0.081538	0.06	0.096923	0.13385	0.14462	0.13231	0.10923	0.078462
0.052857	0.044286	0.052857	0.071429	0.094286	0.10143	0.087143	0.088571	0.11714	0.11143	0.084286	0.091429	0.097143	0.1	0.097143	0.09	0.091429	0.13143	0.13	0.081429	0.08	0.081429	0.08	0.1	0.11571	0.085714	0.09	0.098571	0.097143	0.095714	0.084286	0.078571	0.078571	0.1	0.10571	0.085714	0.075714	0.062857	0.062857	0.087143	0.11857	0.098571	0.055714	0.075714	0.13	0.12571	0.1	0.095714	0.081429	0.072857
0.10571	0.051429	0.068571	0.09	0.088571	0.084286	0.092857	0.10714	0.11286	0.10143	0.098571	0.11286	0.11429	0.11714	0.082857	0.047143	0.092857	0.14857	0.12143	0.084286	0.092857	0.12143	0.11571	0.10571	0.11429	0.091429	0.12571	0.12429	0.081429	0.062857	0.074286	0.08	0.088571	0.088571	0.052857	0.038571	0.064286	0.077143	0.081429	0.17429	0.32143	0.26286	0.085714	0.04	0.065714	0.068571	0.075714	0.095714	0.1	0.078571
0.078667	0.054667	0.081333	0.10267	0.082667	0.064	0.068	0.093333	0.097333	0.072	0.088	0.11067	0.098667	0.098667	0.068	0.064	0.112	0.12933	0.104	0.086667	0.10267	0.11733	0.10933	0.11467	0.10667	0.078667	0.082667	0.10933	0.084	0.046667	0.061333	0.077333	0.084	0.089333	0.064	0.036	0.052	0.072	0.076	0.12133	0.26533	0.29467	0.132	0.036	0.057333	0.065333	0.06	0.084	0.094667	0.073333
0.098571	0.045714	0.06	0.078571	0.085714	0.087143	0.09	0.097143	0.10857	0.11143	0.082857	0.092857	0.12286	0.12714	0.095714	0.047143	0.084286	0.15143	0.13571	0.082857	0.08	0.11	0.11286	0.098571	0.10429	0.095714	0.13143	0.098571	0.051429	0.061429	0.078571	0.10429	0.11571	0.07	0.037143	0.048571	0.071429	0.077143	0.092857	0.20714	0.30571	0.19	0.047143	0.051429	0.08	0.075714	0.084286	0.09	0.094286	0.068571
0.08	0.088	0.096	0.085333	0.08	0.08	0.096	0.104	0.08	0.092	0.11333	0.089333	0.072	0.054667	0.061333	0.11733	0.12533	0.086667	0.085333	0.11067	0.116	0.104	0.10933	0.12267	0.10533	0.081333	0.13467	0.128	0.072	0.062667	0.070667	0.064	0.077333	0.097333	0.065333	0.038667	0.058667	0.072	0.08	0.17733	0.304	0.23067	0.069333	0.032	0.062667	0.068	0.073333	0.097333	0.098667	0.070667
0.091429	0.067143	0.082857	0.094286	0.081429	0.077143	0.087143	0.10143	0.098571	0.082857	0.094286	0.11	0.10286	0.091429	0.064286	0.052857	0.097143	0.14571	0.11286	0.081429	0.094286	0.10857	0.10571	0.10286	0.098571	0.092857	0.082857	0.05	0.057143	0.082857	0.082857	0.1	0.09	0.041429	0.047143	0.077143	0.092857	0.097143	0.23571	0.31714	0.17	0.055714	0.044286	0.058571	0.067143	0.082857	0.10429	0.10571	0.075714	0.047143
0.09125	0.12	0.115	0.0875	0.11125	0.13	0.1025	0.10125	0.1125	0.09875	0.10125	0.10125	0.0925	0.0975	0.0875	0.08125	0.0825	0.07875	0.08875	0.1175	0.11625	0.08	0.06625	0.08125	0.09125	0.065	0.07125	0.085	0.0875	0.04375	0.02125	0.14125	0.275	0.205	0.1225	0.1725	0.1475	0.0725	0.09125	0.08625	0.05375	0.045	0.08625	0.105	0.10125	0.1	0.06125	0.04375	0.06375	0.08375
0.093684	0.076842	0.084211	0.10211	0.092632	0.078947	0.090526	0.091579	0.092632	0.1	0.1	0.082105	0.065263	0.066316	0.067368	0.069474	0.075789	0.091579	0.094737	0.077895	0.051579	0.054737	0.067368	0.069474	0.083158	0.056842	0.071579	0.074737	0.08	0.046316	0.023158	0.065263	0.18	0.19474	0.11474	0.13789	0.15895	0.13263	0.10421	0.068421	0.048421	0.042105	0.055789	0.077895	0.091579	0.086316	0.071579	0.047368	0.035789	0.062105
0.088235	0.10118	0.095294	0.085882	0.11647	0.12	0.091765	0.10118	0.11412	0.10353	0.094118	0.090588	0.087059	0.087059	0.072941	0.074118	0.076471	0.08	0.090588	0.10353	0.1	0.062353	0.057647	0.067059	0.081176	0.055294	0.081176	0.085882	0.094118	0.077647	0.031765	0.027059	0.12118	0.24941	0.19059	0.11647	0.15647	0.17176	0.11647	0.071765	0.071765	0.051765	0.045882	0.077647	0.10118	0.10353	0.090588	0.058824	0.041176	0.061176
0.10875	0.11375	0.09125	0.08875	0.125	0.12125	0.10125	0.1125	0.1125	0.11125	0.1175	0.11	0.0975	0.095	0.07875	0.075	0.08125	0.08625	0.10125	0.115	0.0975	0.06	0.06625	0.0725	0.0875	0.06	0.08375	0.08375	0.09625	0.075	0.03625	0.0375	0.15	0.27	0.19375	0.13125	0.16625	0.1725	0.125	0.0825	0.08125	0.05875	0.05	0.08125	0.105	0.11	0.09125	0.0625	0.055	0.07875
0.095	0.1225	0.09875	0.07375	0.11875	0.1375	0.105	0.10625	0.12375	0.10875	0.09625	0.105	0.1125	0.11	0.08875	0.0825	0.07625	0.08125	0.115	0.1325	0.11125	0.07	0.0725	0.08125	0.0925	0.06375	0.04875	0.07875	0.08875	0.09625	0.08125	0.0325	0.02375	0.15125	0.2725	0.195	0.1275	0.13	0.17375	0.13875	0.0825	0.07875	0.05375	0.05125	0.09	0.125	0.13125	0.11	0.06	0.06375
0.081	0.079	0.085	0.094	0.102	0.08	0.059	0.06	0.069	0.089	0.109	0.087	0.056	0.066	0.074	0.088	0.097	0.073	0.067	0.089	0.072	0.066	0.102	0.105	0.079	0.057	0.047	0.035	0.026	0.035	0.092	0.163	0.225	0.312	0.232	0.055	0.011	0.018	0.031	0.043	0.057	0.08	0.069	0.052	0.057	0.059	0.062	0.064	0.067	0.06
0.080952	0.074286	0.08	0.084762	0.093333	0.074286	0.059048	0.064762	0.068571	0.085714	0.10667	0.084762	0.053333	0.052381	0.05619	0.079048	0.097143	0.074286	0.058095	0.075238	0.068571	0.067619	0.091429	0.09619	0.070476	0.059048	0.060952	0.040952	0.038095	0.030476	0.025714	0.047619	0.10381	0.14571	0.22286	0.28	0.15714	0.051429	0.030476	0.020952	0.04381	0.048571	0.064762	0.084762	0.059048	0.053333	0.060952	0.05619	0.059048	0.06381
0.08	0.075238	0.081905	0.077143	0.097143	0.091429	0.05619	0.047619	0.057143	0.071429	0.1	0.089524	0.055238	0.05619	0.061905	0.080952	0.099048	0.079048	0.059048	0.08	0.071429	0.065714	0.092381	0.09619	0.080952	0.048571	0.037143	0.038095	0.033333	0.027619	0.035238	0.091429	0.13524	0.19714	0.27333	0.21143	0.07619	0.015238	0.014286	0.022857	0.04381	0.057143	0.08	0.078095	0.049524	0.050476	0.06381	0.065714	0.06	0.068571
0.065714	0.068571	0.078095	0.089524	0.090476	0.061905	0.052381	0.06381	0.073333	0.092381	0.10095	0.073333	0.055238	0.064762	0.065714	0.089524	0.095238	0.057143	0.062857	0.08	0.068571	0.077143	0.099048	0.089524	0.071429	0.050476	0.045714	0.038095	0.029524	0.035238	0.088571	0.15429	0.20857	0.28667	0.20952	0.048571	0.011429	0.015238	0.029524	0.044762	0.05619	0.075238	0.066667	0.047619	0.048571	0.05619	0.061905	0.059048	0.058095	0.047619
0.073333	0.073333	0.08381	0.10762	0.093333	0.062857	0.065714	0.072381	0.079048	0.098095	0.093333	0.06	0.049524	0.060952	0.066667	0.085714	0.085714	0.05619	0.062857	0.068571	0.061905	0.08381	0.099048	0.081905	0.069524	0.042857	0.054286	0.052381	0.047619	0.03619	0.022857	0.029524	0.082857	0.15238	0.19905	0.27333	0.20857	0.091429	0.048571	0.010476	0.025714	0.040952	0.068571	0.097143	0.077143	0.050476	0.049524	0.051429	0.065714	0.07619
0.095	0.084	0.111	0.089	0.043	0.045	0.078	0.089	0.081	0.082	0.079	0.079	0.078	0.064	0.078	0.097	0.069	0.055	0.059	0.056	0.075	0.099	0.073	0.048	0.066	0.059	0.074	0.087	0.052	0.036	0.062	0.063	0.034	0.044	0.056	0.052	0.045	0.032	0.028	0.024	0.041	0.111	0.165	0.244	0.275	0.135	0.029	0.028	0.044	0.047
0.098947	0.10105	0.091579	0.055789	0.047368	0.064211	0.081053	0.083158	0.086316	0.085263	0.074737	0.061053	0.050526	0.069474	0.095789	0.082105	0.057895	0.058947	0.055789	0.077895	0.11158	0.095789	0.054737	0.051579	0.077895	0.067368	0.053684	0.04	0.042105	0.068421	0.061053	0.032632	0.04	0.06	0.056842	0.04	0.023158	0.012632	0.028421	0.071579	0.14947	0.18737	0.28421	0.25158	0.064211	0.025263	0.037895	0.047368	0.049474	0.061053
0.10526	0.089474	0.12526	0.10947	0.055789	0.050526	0.069474	0.074737	0.08	0.088421	0.086316	0.084211	0.082105	0.065263	0.072632	0.1	0.081053	0.06	0.057895	0.054737	0.075789	0.10842	0.092632	0.054737	0.061053	0.054737	0.057895	0.091579	0.067368	0.032632	0.053684	0.070526	0.044211	0.04	0.050526	0.053684	0.058947	0.056842	0.042105	0.030526	0.031579	0.090526	0.17158	0.22947	0.30526	0.21368	0.053684	0.029474	0.036842	0.038947
0.10526	0.089474	0.12526	0.10947	0.055789	0.050526	0.069474	0.074737	0.08	0.088421	0.086316	0.084211	0.082105	0.065263	0.072632	0.1	0.081053	0.06	0.057895	0.054737	0.075789	0.10842	0.092632	0.054737	0.061053	0.054737	0.057895	0.091579	0.067368	0.032632	0.053684	0.070526	0.044211	0.04	0.050526	0.053684	0.058947	0.056842	0.042105	0.030526	0.031579	0.090526	0.17158	0.22947	0.30526	0.21368	0.053684	0.029474	0.036842	0.038947
0.102	0.092	0.048	0.037	0.066	0.08	0.077	0.084	0.089	0.083	0.069	0.07	0.08	0.09	0.078	0.054	0.056	0.05	0.061	0.1	0.095	0.052	0.043	0.062	0.089	0.065	0.059	0.053	0.043	0.052	0.065	0.053	0.035	0.05	0.062	0.052	0.045	0.04	0.028	0.028	0.074	0.13	0.155	0.23	0.228	0.086	0.026	0.037	0.045	0.057
0.07	0.065	0.079	0.07	0.063	0.087	0.083	0.07	0.083	0.088	0.081	0.076	0.074	0.072	0.057	0.054	0.07	0.092	0.084	0.06	0.063	0.068	0.073	0.069	0.055	0.054	0.044	0.044	0.044	0.046	0.039	0.04	0.035	0.037	0.066	0.161	0.208	0.174	0.125	0.052	0.037	0.089	0.177	0.152	0.059	0.034	0.045	0.063	0.053	0.039
0.083158	0.063158	0.057895	0.077895	0.084211	0.064211	0.069474	0.093684	0.087368	0.068421	0.064211	0.057895	0.046316	0.049474	0.061053	0.076842	0.076842	0.062105	0.062105	0.071579	0.078947	0.070526	0.061053	0.053684	0.051579	0.04	0.026316	0.037895	0.027368	0.032632	0.052632	0.045263	0.037895	0.029474	0.036842	0.08	0.11474	0.12632	0.20421	0.18632	0.066316	0.038947	0.062105	0.13474	0.16211	0.078947	0.021053	0.036842	0.061053	0.056842
0.078889	0.083333	0.078889	0.077778	0.086667	0.08	0.064444	0.088889	0.11	0.09	0.073333	0.072222	0.071111	0.054444	0.057778	0.08	0.091111	0.088889	0.068889	0.071111	0.082222	0.094444	0.086667	0.066667	0.064444	0.054444	0.05	0.057778	0.058889	0.05	0.045556	0.034444	0.041111	0.084444	0.12	0.21556	0.20778	0.11333	0.07	0.028889	0.064444	0.14333	0.17111	0.09	0.025556	0.038889	0.071111	0.074444	0.052222	0.05
0.079	0.061	0.056	0.081	0.081	0.058	0.075	0.096	0.082	0.066	0.062	0.053	0.04	0.043	0.058	0.08	0.076	0.06	0.061	0.07	0.08	0.072	0.06	0.048	0.048	0.036	0.02	0.034	0.033	0.042	0.053	0.039	0.032	0.024	0.035	0.079	0.108	0.114	0.187	0.177	0.064	0.039	0.068	0.137	0.16	0.078	0.023	0.04	0.061	0.056
0.087778	0.091111	0.081111	0.064444	0.071111	0.088889	0.081111	0.068889	0.10333	0.10889	0.074444	0.067778	0.071111	0.071111	0.064444	0.057778	0.073333	0.087778	0.072222	0.066667	0.082222	0.097778	0.097778	0.072222	0.057778	0.051111	0.047778	0.038889	0.037778	0.054444	0.057778	0.055556	0.042222	0.035556	0.054444	0.092222	0.19556	0.26889	0.22444	0.12111	0.046667	0.048889	0.13222	0.18333	0.12444	0.058889	0.036667	0.056667	0.075556	0.051111
0.08	0.09375	0.08875	0.06875	0.0975	0.12375	0.09875	0.07875	0.06125	0.05	0.0575	0.08125	0.0975	0.11125	0.1	0.06625	0.0725	0.0875	0.08625	0.0875	0.07375	0.06875	0.0775	0.0625	0.0725	0.0425	0.0525	0.0875	0.06875	0.07125	0.0625	0.03125	0.0325	0.0325	0.08125	0.15	0.22375	0.28	0.29	0.15625	0.01375	0.03125	0.0375	0.03375	0.05875	0.09	0.09375	0.08875	0.07625	0.06
0.095294	0.072941	0.085882	0.11176	0.1	0.072941	0.06	0.051765	0.045882	0.067059	0.097647	0.092941	0.077647	0.064706	0.063529	0.08	0.075294	0.075294	0.069412	0.065882	0.074118	0.056471	0.064706	0.10706	0.1	0.069412	0.074118	0.050588	0.044706	0.071765	0.067059	0.06	0.047059	0.028235	0.029412	0.023529	0.083529	0.14588	0.16706	0.27529	0.27529	0.10471	0.028235	0.045882	0.038824	0.032941	0.061176	0.072941	0.065882	0.062353
0.09625	0.08	0.0825	0.1125	0.12125	0.08125	0.0575	0.055	0.05125	0.06375	0.09125	0.10375	0.105	0.0875	0.07375	0.0875	0.095	0.09875	0.085	0.07	0.08625	0.07125	0.0525	0.09125	0.1	0.04875	0.035	0.07	0.08375	0.07875	0.06625	0.04125	0.04	0.035	0.03625	0.1275	0.21125	0.215	0.3275	0.23625	0.03	0.03625	0.045	0.035	0.0475	0.08125	0.095	0.0825	0.07625	0.065
0.09625	0.0775	0.1075	0.13625	0.1125	0.06875	0.0525	0.05125	0.05625	0.085	0.11875	0.11125	0.0925	0.07625	0.07	0.08625	0.08625	0.0875	0.0725	0.06375	0.07625	0.0675	0.06875	0.095	0.1	0.03875	0.03875	0.0775	0.07875	0.0775	0.05875	0.03	0.04125	0.04	0.0725	0.14625	0.25125	0.325	0.3075	0.14875	0.025	0.04625	0.0375	0.035	0.0625	0.0925	0.09375	0.09125	0.09125	0.0775
0.09375	0.09125	0.08	0.0925	0.12	0.11125	0.0725	0.05625	0.05125	0.05375	0.085	0.11	0.1125	0.10875	0.0825	0.06625	0.07625	0.09375	0.0925	0.0625	0.05625	0.07	0.07	0.0675	0.07875	0.0425	0.0525	0.0825	0.0675	0.065	0.05625	0.03	0.02875	0.02375	0.08125	0.1475	0.255	0.3575	0.3	0.12625	0.0175	0.045	0.0475	0.03625	0.07	0.09875	0.09125	0.08375	0.06625	0.055
0.11143	0.095714	0.072857	0.07	0.077143	0.075714	0.097143	0.12286	0.1	0.072857	0.088571	0.11143	0.11714	0.11571	0.09	0.065714	0.088571	0.10143	0.074286	0.081429	0.10714	0.098571	0.095714	0.11286	0.10286	0.082857	0.1	0.10429	0.11857	0.087143	0.045714	0.047143	0.055714	0.04	0.075714	0.12143	0.22429	0.33143	0.28143	0.14714	0.081429	0.058571	0.024286	0.061429	0.087143	0.072857	0.11857	0.11429	0.051429	0.061429
0.088	0.108	0.10133	0.076	0.06	0.064	0.064	0.085333	0.12933	0.116	0.074667	0.084	0.096	0.116	0.11333	0.088	0.077333	0.086667	0.10133	0.085333	0.078667	0.096	0.096	0.086667	0.093333	0.058667	0.076	0.084	0.092	0.116	0.090667	0.041333	0.044	0.050667	0.034667	0.12133	0.15733	0.096	0.24933	0.256	0.104	0.069333	0.030667	0.029333	0.069333	0.077333	0.084	0.124	0.093333	0.049333
0.12833	0.12667	0.085	0.061667	0.083333	0.091667	0.096667	0.125	0.13833	0.115	0.091667	0.12333	0.15333	0.14	0.12333	0.095	0.088333	0.115	0.098333	0.085	0.11167	0.11833	0.115	0.12667	0.11833	0.081667	0.086667	0.115	0.13833	0.096667	0.05	0.078333	0.08	0.035	0.11	0.18167	0.29667	0.43333	0.29833	0.13833	0.09	0.045	0.035	0.071667	0.088333	0.095	0.14	0.11833	0.063333	0.081667
0.078824	0.063529	0.047059	0.062353	0.074118	0.077647	0.11176	0.11176	0.065882	0.054118	0.084706	0.10118	0.094118	0.089412	0.068235	0.063529	0.083529	0.076471	0.063529	0.087059	0.089412	0.074118	0.089412	0.090588	0.069412	0.068235	0.081176	0.065882	0.083529	0.090588	0.051765	0.034118	0.049412	0.042353	0.043529	0.085882	0.16353	0.21412	0.24588	0.14824	0.069412	0.072941	0.024706	0.041176	0.070588	0.069412	0.097647	0.10235	0.049412	0.044706
0.1	0.12714	0.098571	0.055714	0.048571	0.065714	0.078571	0.091429	0.12857	0.12571	0.077143	0.088571	0.11429	0.12714	0.11429	0.087143	0.077143	0.088571	0.092857	0.074286	0.091429	0.11571	0.10143	0.092857	0.10143	0.064286	0.048571	0.065714	0.078571	0.11143	0.12143	0.07	0.037143	0.068571	0.064286	0.045714	0.12571	0.19714	0.19571	0.27	0.21143	0.094286	0.071429	0.031429	0.044286	0.072857	0.075714	0.094286	0.12	0.08
0.11412	0.076471	0.052941	0.078824	0.10235	0.087059	0.084706	0.087059	0.084706	0.087059	0.10235	0.097647	0.072941	0.056471	0.06	0.069412	0.065882	0.084706	0.077647	0.069412	0.078824	0.076471	0.075294	0.085882	0.077647	0.055294	0.035294	0.051765	0.043529	0.15765	0.29529	0.20471	0.10941	0.14588	0.13176	0.062353	0.031765	0.028235	0.043529	0.068235	0.077647	0.055294	0.027059	0.043529	0.069412	0.044706	0.022353	0.06	0.065882	0.049412
0.081053	0.041053	0.062105	0.091579	0.078947	0.072632	0.089474	0.088421	0.073684	0.092632	0.10632	0.071579	0.048421	0.066316	0.072632	0.054737	0.065263	0.077895	0.069474	0.070526	0.068421	0.057895	0.065263	0.070526	0.054737	0.052632	0.058947	0.050526	0.10105	0.25684	0.22105	0.10632	0.12316	0.10947	0.062105	0.029474	0.036842	0.048421	0.065263	0.074737	0.048421	0.024211	0.047368	0.065263	0.034737	0.021053	0.051579	0.052632	0.022105	0.044211
0.068182	0.099091	0.079091	0.043636	0.053636	0.070909	0.065455	0.063636	0.070909	0.069091	0.057273	0.073636	0.098182	0.086364	0.057273	0.06	0.068182	0.06	0.074545	0.077273	0.070909	0.065455	0.050909	0.047273	0.057273	0.041818	0.043636	0.045455	0.055455	0.17909	0.22636	0.12455	0.10455	0.11636	0.088182	0.047273	0.025455	0.021818	0.037273	0.061818	0.06	0.034545	0.032727	0.050909	0.041818	0.023636	0.032727	0.048182	0.031818	0.038182
0.075238	0.1	0.077143	0.046667	0.059048	0.07619	0.069524	0.061905	0.068571	0.069524	0.065714	0.087619	0.10857	0.090476	0.05619	0.054286	0.057143	0.047619	0.062857	0.067619	0.064762	0.069524	0.05619	0.044762	0.051429	0.04381	0.029524	0.038095	0.042857	0.039048	0.073333	0.20952	0.20667	0.1019	0.10857	0.11048	0.071429	0.038095	0.030476	0.027619	0.046667	0.068571	0.060952	0.031429	0.041905	0.062857	0.038095	0.017143	0.041905	0.048571
0.06381	0.04	0.072381	0.084762	0.062857	0.066667	0.077143	0.070476	0.066667	0.087619	0.08381	0.050476	0.041905	0.061905	0.06	0.048571	0.068571	0.075238	0.068571	0.06	0.053333	0.059048	0.069524	0.06	0.046667	0.042857	0.046667	0.048571	0.070476	0.21619	0.23524	0.11429	0.10286	0.098095	0.06381	0.032381	0.035238	0.045714	0.057143	0.05619	0.038095	0.025714	0.033333	0.051429	0.033333	0.013333	0.039048	0.05619	0.029524	0.03619
0.068889	0.065556	0.066667	0.058889	0.06	0.072222	0.07	0.063333	0.062222	0.097778	0.094444	0.052222	0.042222	0.064444	0.088889	0.073333	0.073333	0.092222	0.091111	0.077778	0.086667	0.096667	0.064444	0.058889	0.077778	0.054444	0.048889	0.074444	0.11667	0.15778	0.12889	0.11444	0.11889	0.11444	0.12333	0.095556	0.055556	0.033333	0.075556	0.1	0.06	0.03	0.041111	0.06	0.038889	0.024444	0.042222	0.03	0.033333	0.053333
0.090588	0.077647	0.064706	0.058824	0.065882	0.078824	0.078824	0.068235	0.055294	0.097647	0.11294	0.063529	0.042353	0.063529	0.087059	0.071765	0.071765	0.091765	0.092941	0.089412	0.10235	0.10941	0.070588	0.06	0.083529	0.052941	0.044706	0.075294	0.12824	0.16824	0.13529	0.12353	0.13059	0.12588	0.13529	0.10235	0.058824	0.035294	0.081176	0.10471	0.065882	0.035294	0.044706	0.069412	0.042353	0.025882	0.047059	0.032941	0.041176	0.063529
0.071111	0.06	0.065556	0.08	0.087778	0.075556	0.05	0.058889	0.11111	0.10444	0.061111	0.076667	0.1	0.098889	0.083333	0.07	0.074444	0.078889	0.074444	0.10333	0.10444	0.051111	0.053333	0.056667	0.058889	0.055556	0.048889	0.044444	0.042222	0.073333	0.14667	0.15556	0.10556	0.12333	0.12778	0.12444	0.11333	0.08	0.051111	0.034444	0.095556	0.093333	0.04	0.046667	0.071111	0.065556	0.03	0.036667	0.047778	0.052222
0.054783	0.046957	0.043478	0.051304	0.067826	0.05913	0.037391	0.047826	0.085217	0.070435	0.037391	0.053913	0.069565	0.065217	0.055652	0.061739	0.069565	0.066087	0.053913	0.073913	0.078261	0.041739	0.053043	0.05913	0.057391	0.050435	0.038261	0.031304	0.041739	0.10783	0.14696	0.10348	0.086087	0.095652	0.093913	0.096522	0.05913	0.015652	0.02087	0.050435	0.075652	0.054783	0.030435	0.035652	0.049565	0.033913	0.018261	0.029565	0.02087	0.031304
0.06	0.057	0.056	0.058	0.067	0.071	0.055	0.052	0.097	0.092	0.05	0.058	0.072	0.074	0.069	0.073	0.077	0.078	0.071	0.085	0.09	0.049	0.055	0.065	0.063	0.04	0.043	0.064	0.114	0.161	0.122	0.105	0.115	0.115	0.113	0.06	0.032	0.036	0.072	0.085	0.052	0.036	0.047	0.055	0.03	0.026	0.039	0.026	0.04	0.055
0.09871	0.092258	0.050968	0.043871	0.067097	0.061935	0.04	0.032258	0.036129	0.055484	0.065806	0.046452	0.033548	0.043226	0.051613	0.059355	0.041935	0.027097	0.045806	0.044516	0.030323	0.050323	0.072258	0.053548	0.03871	0.029677	0.019355	0.032903	0.037419	0.034194	0.028387	0.034839	0.032258	0.012258	0.063871	0.17806	0.20516	0.17677	0.13935	0.068387	0.02	0.0070968	0.016129	0.030323	0.053548	0.052258	0.027742	0.036129	0.055484	0.051613
0.067027	0.031351	0.046486	0.05027	0.031351	0.027027	0.031351	0.038919	0.058919	0.048108	0.035135	0.042703	0.042162	0.049189	0.041622	0.024324	0.037838	0.044865	0.027568	0.034595	0.057297	0.050811	0.031351	0.031892	0.031892	0.021622	0.016757	0.034054	0.037297	0.026486	0.027568	0.033514	0.025946	0.012432	0.044865	0.11784	0.13622	0.11892	0.10811	0.064324	0.022162	0.011892	0.014595	0.023784	0.045405	0.051892	0.028108	0.027568	0.04	0.034054
0.084571	0.098857	0.058857	0.033714	0.050857	0.056571	0.038286	0.026286	0.030286	0.042286	0.060571	0.051429	0.030857	0.034286	0.041714	0.050857	0.042857	0.022857	0.034857	0.050286	0.035429	0.034286	0.058857	0.062286	0.036	0.019429	0.02	0.032	0.037143	0.033714	0.026857	0.028571	0.022857	0.015429	0.079429	0.184	0.18057	0.13371	0.10457	0.045143	0.010857	0.0085714	0.022286	0.035429	0.051429	0.047429	0.021714	0.030857	0.045143	0.041143
0.11857	0.082857	0.038571	0.048571	0.079286	0.062143	0.036429	0.031429	0.042857	0.071429	0.065714	0.043571	0.042857	0.050714	0.057143	0.060714	0.036429	0.037857	0.060714	0.041429	0.035714	0.074286	0.087143	0.047143	0.039286	0.034286	0.028571	0.026429	0.035	0.045	0.046429	0.042143	0.04	0.033571	0.017143	0.091429	0.17929	0.18286	0.20929	0.165	0.074286	0.030714	0.0092857	0.022143	0.040714	0.058571	0.060714	0.037143	0.033571	0.041429
0.10194	0.052903	0.043226	0.06129	0.063226	0.046452	0.033548	0.033548	0.057419	0.074194	0.049677	0.043226	0.052903	0.052903	0.054839	0.040645	0.028387	0.048387	0.051613	0.032258	0.047742	0.076774	0.057419	0.029032	0.035484	0.034194	0.029677	0.042581	0.047742	0.04	0.034839	0.035484	0.030968	0.014194	0.054194	0.15226	0.17355	0.1471	0.13032	0.076774	0.025161	0.0096774	0.016129	0.032903	0.05871	0.062581	0.035484	0.028387	0.044516	0.048387
0.033171	0.03122	0.037561	0.029756	0.039024	0.093659	0.11171	0.064878	0.034146	0.048293	0.057073	0.041463	0.030244	0.029268	0.025854	0.035122	0.051707	0.038537	0.029756	0.041463	0.041463	0.031707	0.020976	0.031707	0.035122	0.017561	0.023902	0.026341	0.021951	0.021463	0.026341	0.026341	0.074634	0.17171	0.17902	0.093659	0.02439	0.0019512	0.0039024	0.0087805	0.021463	0.029268	0.039512	0.04439	0.026829	0.026829	0.041951	0.041951	0.03122	0.023415
0.032857	0.025714	0.032381	0.035714	0.020952	0.049048	0.11095	0.097619	0.044286	0.04	0.054286	0.049524	0.041905	0.032381	0.021429	0.024762	0.04381	0.052381	0.036667	0.029524	0.03381	0.042857	0.030952	0.019524	0.032381	0.017619	0.015238	0.02381	0.027619	0.02619	0.02	0.027143	0.030476	0.040476	0.10524	0.17905	0.15571	0.10571	0.060952	0.011905	0.0090476	0.014762	0.026667	0.03	0.035238	0.029048	0.017143	0.029524	0.040476	0.033333
0.024444	0.019556	0.032444	0.034222	0.027556	0.062667	0.10267	0.075556	0.035111	0.04	0.056444	0.046667	0.033778	0.029333	0.021333	0.022222	0.040889	0.044889	0.029333	0.032	0.037778	0.034667	0.02	0.019556	0.029333	0.021333	0.024889	0.026222	0.024	0.019111	0.024	0.022222	0.056	0.14533	0.16311	0.095556	0.030667	0.0026667	0.0044444	0.0093333	0.018667	0.023556	0.032	0.032889	0.016889	0.019111	0.033333	0.036444	0.028	0.021778
0.026286	0.032	0.038857	0.030857	0.081714	0.136	0.10114	0.052571	0.053143	0.064	0.060571	0.046286	0.032	0.027429	0.030286	0.061143	0.065143	0.037143	0.036571	0.048571	0.049143	0.029143	0.028571	0.050286	0.041714	0.026857	0.036571	0.037714	0.034286	0.029714	0.027429	0.026286	0.022857	0.098286	0.18571	0.19486	0.12629	0.058286	0.032571	0.0068571	0.008	0.021714	0.037714	0.046857	0.050286	0.030857	0.025143	0.044	0.048571	0.036
0.027727	0.037273	0.032727	0.024091	0.08	0.115	0.065455	0.031364	0.043182	0.05	0.039545	0.024545	0.015455	0.015909	0.025	0.049545	0.045909	0.029545	0.033636	0.036364	0.035	0.019545	0.027727	0.045	0.032273	0.016818	0.021818	0.028636	0.028182	0.026364	0.02	0.017273	0.016818	0.042727	0.10955	0.16409	0.13591	0.090909	0.054545	0.012727	0.0068182	0.012727	0.027273	0.034091	0.04	0.03	0.017727	0.032727	0.041818	0.032273
0.036	0.0325	0.044	0.104	0.1295	0.073	0.032	0.047	0.0545	0.0355	0.025	0.0235	0.02	0.0335	0.054	0.0445	0.0275	0.039	0.052	0.041	0.0185	0.0285	0.0405	0.028	0.036	0.0315	0.035	0.034	0.037	0.0385	0.037	0.0275	0.0165	0.0185	0.025	0.0275	0.0245	0.018	0.0225	0.0245	0.02	0.047	0.138	0.1865	0.1485	0.0745	0.016	0.008	0.0165	0.0325
0.035814	0.029767	0.031628	0.08093	0.11442	0.072093	0.028372	0.038605	0.053023	0.035814	0.02186	0.023256	0.024186	0.032558	0.048837	0.04186	0.025581	0.034884	0.049302	0.046977	0.022326	0.025581	0.043256	0.032093	0.032093	0.030233	0.020465	0.030698	0.04	0.036279	0.026977	0.016279	0.016744	0.022326	0.025116	0.025581	0.021395	0.018605	0.022791	0.02093	0.028372	0.094884	0.18047	0.16465	0.076279	0.023721	0.0097674	0.013953	0.026047	0.029767
0.028421	0.022105	0.055789	0.11895	0.11895	0.06	0.039474	0.058947	0.052632	0.032632	0.03	0.029474	0.023158	0.040526	0.057368	0.037895	0.029474	0.046842	0.055789	0.037895	0.013684	0.031053	0.045263	0.037368	0.046842	0.026316	0.031579	0.030526	0.032105	0.043158	0.041053	0.036842	0.023158	0.015789	0.022105	0.027368	0.028947	0.025263	0.024737	0.024737	0.022632	0.023158	0.098947	0.18368	0.19632	0.12316	0.032105	0.013158	0.011053	0.024737
0.032683	0.02878	0.033171	0.086341	0.12488	0.08	0.03561	0.045366	0.054146	0.036585	0.026829	0.02878	0.027317	0.035122	0.050732	0.042439	0.02439	0.034634	0.047805	0.042927	0.021463	0.028293	0.046341	0.03122	0.033659	0.037073	0.03122	0.029268	0.036098	0.03561	0.033659	0.023415	0.014634	0.02	0.025854	0.026829	0.023415	0.018537	0.023902	0.025854	0.020976	0.053171	0.14341	0.1839	0.13707	0.062927	0.014146	0.0087805	0.014146	0.029268
0.031795	0.030256	0.032821	0.088205	0.12923	0.085641	0.035897	0.04359	0.060513	0.041538	0.027179	0.026667	0.02359	0.032821	0.052821	0.046154	0.026154	0.037949	0.052308	0.046667	0.023077	0.029744	0.044615	0.028718	0.033333	0.029231	0.030769	0.026667	0.028205	0.033333	0.030769	0.027692	0.021026	0.02359	0.027692	0.027692	0.029231	0.025641	0.022564	0.020513	0.019487	0.031282	0.11538	0.18564	0.17333	0.099487	0.024615	0.011282	0.014872	0.032308
0.022326	0.036744	0.032558	0.032558	0.043256	0.058605	0.052558	0.026512	0.017674	0.01907	0.028837	0.022326	0.0093023	0.017209	0.063721	0.10558	0.072558	0.034884	0.045116	0.053488	0.04093	0.025581	0.020465	0.02093	0.036744	0.017674	0.017674	0.01814	0.01814	0.025116	0.024651	0.015349	0.032093	0.084186	0.10744	0.14186	0.14047	0.096744	0.068837	0.023721	0.012093	0.015814	0.015814	0.025116	0.034884	0.030233	0.015814	0.010233	0.018605	0.025581
0.024286	0.034286	0.033333	0.027143	0.032857	0.042857	0.056667	0.041905	0.020952	0.020952	0.026667	0.029524	0.026667	0.018095	0.037143	0.095238	0.097143	0.051905	0.043333	0.054286	0.052381	0.037619	0.025714	0.022857	0.040952	0.021429	0.018095	0.017619	0.021429	0.025238	0.018095	0.025238	0.060476	0.092381	0.12	0.15476	0.12095	0.070476	0.040952	0.0090476	0.01619	0.018095	0.022381	0.029048	0.029524	0.024286	0.01381	0.020476	0.030952	0.031905
0.03	0.0375	0.042	0.031	0.031	0.043	0.065	0.0565	0.027	0.0205	0.0235	0.038	0.046	0.03	0.0215	0.078	0.111	0.0675	0.0445	0.0595	0.062	0.0485	0.036	0.0225	0.0365	0.0215	0.0165	0.0235	0.0275	0.028	0.048	0.093	0.121	0.1615	0.1435	0.054	0.0145	0.007	0.0155	0.0195	0.0215	0.034	0.0415	0.0365	0.02	0.0165	0.03	0.0365	0.03	0.025
0.025263	0.034737	0.031579	0.034737	0.044737	0.061579	0.062105	0.034737	0.022105	0.022632	0.032632	0.032105	0.022105	0.020526	0.061579	0.11526	0.088421	0.046842	0.055263	0.067368	0.056316	0.038947	0.028421	0.022632	0.043158	0.023158	0.018947	0.024211	0.03	0.023684	0.022632	0.072105	0.10842	0.14632	0.17	0.11684	0.050526	0.013684	0.011579	0.017368	0.018421	0.021579	0.035263	0.036842	0.024211	0.013684	0.022632	0.036316	0.036842	0.023684
0.024737	0.033158	0.033158	0.028947	0.036316	0.056842	0.071053	0.048947	0.028421	0.027368	0.035263	0.034737	0.026316	0.016842	0.046316	0.11579	0.10895	0.056842	0.054737	0.070526	0.064737	0.040526	0.022105	0.017368	0.040526	0.023158	0.021053	0.022105	0.027368	0.029474	0.023684	0.043158	0.086842	0.11526	0.14474	0.16053	0.10316	0.051579	0.030526	0.012105	0.018421	0.020526	0.029474	0.041053	0.043684	0.027368	0.014211	0.026842	0.037368	0.032105
0.049767	0.056744	0.028837	0.014884	0.016744	0.030233	0.033023	0.02186	0.065581	0.10977	0.082791	0.04186	0.026977	0.04186	0.052093	0.037209	0.028372	0.029302	0.027907	0.043721	0.053953	0.035814	0.036279	0.046047	0.04186	0.030233	0.035814	0.035349	0.026512	0.023721	0.027442	0.025116	0.016279	0.012093	0.012558	0.01907	0.025581	0.026977	0.022791	0.015814	0.032558	0.05814	0.069767	0.11349	0.17953	0.14698	0.046977	0.012093	0.017209	0.025116
0.04186	0.05814	0.073488	0.056744	0.026512	0.015814	0.018605	0.034419	0.030233	0.024186	0.078605	0.11488	0.10512	0.071163	0.037209	0.048372	0.052558	0.035814	0.026047	0.020465	0.026047	0.054419	0.052093	0.028372	0.033488	0.024651	0.033953	0.043721	0.036279	0.029767	0.027442	0.025116	0.01814	0.012093	0.013023	0.02093	0.027907	0.027907	0.023721	0.016744	0.039535	0.079535	0.10093	0.13442	0.16791	0.11395	0.030233	0.010233	0.014419	0.024186
0.046667	0.068095	0.060952	0.032857	0.019048	0.019524	0.032381	0.034762	0.01619	0.055714	0.11667	0.097143	0.061905	0.040952	0.04	0.063333	0.047619	0.023333	0.024286	0.025714	0.038571	0.047619	0.029524	0.026667	0.034286	0.034286	0.034286	0.030952	0.029048	0.03	0.027619	0.018571	0.01381	0.017143	0.024286	0.027619	0.02	0.013333	0.022857	0.052381	0.079524	0.11333	0.17381	0.15429	0.058571	0.013333	0.01	0.010952	0.018571	0.027619
0.049302	0.070698	0.066977	0.040465	0.019535	0.017674	0.026512	0.037674	0.024186	0.04186	0.10512	0.10744	0.077209	0.047442	0.034419	0.05907	0.050233	0.026047	0.024186	0.024651	0.035814	0.053023	0.036279	0.026512	0.036279	0.043256	0.041395	0.033488	0.029767	0.025581	0.023721	0.01814	0.014884	0.02	0.025116	0.025581	0.018605	0.012093	0.017674	0.045581	0.079535	0.11116	0.1707	0.16093	0.068837	0.017674	0.011163	0.012093	0.018605	0.027907
0.045714	0.058857	0.081714	0.082286	0.042286	0.021714	0.021714	0.026857	0.037714	0.025714	0.056571	0.12	0.13943	0.11943	0.068571	0.053714	0.066286	0.054286	0.036571	0.029143	0.030286	0.048	0.062857	0.041714	0.037714	0.029143	0.038286	0.045143	0.041714	0.036	0.032571	0.034286	0.023429	0.013143	0.017714	0.032	0.037143	0.029714	0.024571	0.016	0.050857	0.096	0.12914	0.17371	0.19143	0.12057	0.032	0.014857	0.017714	0.032
0.037222	0.020556	0.012778	0.015556	0.034444	0.045	0.038333	0.028889	0.027778	0.025556	0.017222	0.030556	0.048889	0.077778	0.068333	0.024444	0.025	0.035	0.046667	0.056111	0.045	0.027778	0.025	0.021667	0.021111	0.025	0.029444	0.028333	0.021111	0.023889	0.026667	0.020556	0.023889	0.023889	0.045556	0.10889	0.10333	0.06	0.060556	0.052222	0.030556	0.022778	0.030556	0.027222	0.020556	0.021667	0.023333	0.017778	0.012222	0.021111
0.0528	0.0312	0.0168	0.028	0.0544	0.0608	0.0488	0.0384	0.048	0.0376	0.024	0.0704	0.1104	0.1208	0.0784	0.0304	0.0432	0.0568	0.072	0.0808	0.0536	0.0304	0.0344	0.0384	0.0416	0.0384	0.0376	0.0416	0.0312	0.0272	0.0384	0.0376	0.0376	0.0376	0.0384	0.1168	0.1552	0.1232	0.1048	0.0872	0.0576	0.0256	0.0392	0.0512	0.0376	0.032	0.0416	0.0384	0.0192	0.028
0.045143	0.027429	0.014857	0.011429	0.027429	0.042857	0.046857	0.036571	0.028	0.034286	0.025714	0.022286	0.030857	0.065143	0.079429	0.04	0.024	0.034286	0.050286	0.063429	0.057714	0.033714	0.024571	0.025714	0.024	0.024	0.023429	0.031429	0.032	0.025143	0.023429	0.028	0.028571	0.027429	0.027429	0.030857	0.08	0.12114	0.11486	0.082857	0.067429	0.051429	0.026857	0.033143	0.033143	0.022857	0.019429	0.026286	0.028	0.019429
0.043636	0.027273	0.018182	0.027273	0.044242	0.047879	0.035758	0.027879	0.033333	0.024848	0.024242	0.066667	0.093333	0.081818	0.044242	0.021818	0.033939	0.050909	0.06	0.059394	0.041212	0.026061	0.025455	0.027273	0.032121	0.029091	0.038788	0.031515	0.021818	0.028485	0.027273	0.018182	0.028485	0.035758	0.069697	0.11576	0.096364	0.065455	0.073333	0.059394	0.028485	0.027273	0.041818	0.038182	0.025455	0.023636	0.026061	0.01697	0.010303	0.026061
0.071538	0.036154	0.022308	0.013846	0.027692	0.047692	0.061538	0.052308	0.034615	0.042308	0.036923	0.025385	0.024615	0.063846	0.10692	0.070769	0.027692	0.036154	0.053846	0.074615	0.086923	0.060769	0.038462	0.036154	0.036923	0.029231	0.032308	0.045385	0.038462	0.026923	0.029231	0.034615	0.030769	0.034615	0.037692	0.054615	0.12462	0.16923	0.14385	0.096923	0.09	0.067692	0.031538	0.038462	0.048462	0.040769	0.031538	0.035385	0.036154	0.028462
0.0752	0.0536	0.056	0.0672	0.0632	0.056	0.06	0.064	0.096	0.1072	0.0848	0.0744	0.0672	0.084	0.0888	0.0744	0.0768	0.0784	0.0672	0.0576	0.064	0.0784	0.0792	0.0752	0.0824	0.0384	0.0408	0.044	0.036	0.0376	0.0328	0.0304	0.0424	0.0568	0.0432	0.0232	0.0528	0.0816	0.3048	0.3864	0.1472	0.0408	0.0344	0.0416	0.0472	0.0576	0.0824	0.076	0.0592	0.0536
0.050909	0.051515	0.046061	0.035758	0.042424	0.042424	0.058182	0.075152	0.069091	0.059394	0.059394	0.066667	0.067879	0.066061	0.061818	0.05697	0.055758	0.055152	0.050909	0.054545	0.06	0.06303	0.064242	0.059394	0.051515	0.027879	0.029091	0.027879	0.030303	0.026667	0.023636	0.035758	0.044242	0.031515	0.012121	0.024848	0.13636	0.22545	0.30606	0.23515	0.048485	0.012121	0.024848	0.032727	0.035758	0.058788	0.058182	0.040606	0.041818	0.037576
0.05	0.05	0.048	0.035333	0.044667	0.049333	0.058	0.073333	0.075333	0.065333	0.058667	0.068	0.076	0.073333	0.068	0.056667	0.048667	0.05	0.051333	0.061333	0.068	0.072	0.072	0.066	0.064667	0.024	0.026	0.034	0.034	0.024667	0.028667	0.043333	0.044	0.02	0.020667	0.10533	0.292	0.41333	0.282	0.082667	0.015333	0.027333	0.037333	0.036	0.060667	0.069333	0.044	0.037333	0.042	0.034667
0.058462	0.060769	0.061538	0.047692	0.053846	0.056154	0.078462	0.10231	0.093846	0.08	0.075385	0.083077	0.084615	0.077692	0.070769	0.072308	0.066923	0.058462	0.061538	0.075385	0.078462	0.072308	0.079231	0.085385	0.08	0.040769	0.042308	0.042308	0.038462	0.038462	0.034615	0.032308	0.04	0.053846	0.040769	0.012308	0.033077	0.061538	0.28385	0.38846	0.18385	0.057692	0.019231	0.035385	0.045385	0.050769	0.084615	0.076923	0.042308	0.040769
0.072857	0.051429	0.052143	0.056429	0.049286	0.054286	0.057143	0.059286	0.087857	0.089286	0.069286	0.062857	0.06	0.077143	0.077143	0.063571	0.067857	0.065	0.057143	0.052857	0.067143	0.079286	0.073571	0.072143	0.073571	0.038571	0.032857	0.032143	0.027143	0.035	0.033571	0.032143	0.041429	0.046429	0.031429	0.025714	0.056429	0.075714	0.3	0.35214	0.11214	0.034286	0.025	0.036429	0.046429	0.052857	0.074286	0.067857	0.05	0.043571
0.086957	0.081739	0.098261	0.11217	0.087826	0.061739	0.054783	0.047826	0.068696	0.077391	0.062609	0.075652	0.090435	0.088696	0.066957	0.06087	0.081739	0.08087	0.075652	0.08	0.07913	0.068696	0.06087	0.053043	0.071304	0.048696	0.024348	0.044348	0.054783	0.053913	0.071304	0.073043	0.048696	0.033043	0.038261	0.04087	0.034783	0.034783	0.12522	0.22522	0.24783	0.21304	0.1	0.045217	0.065217	0.052174	0.036522	0.052174	0.058261	0.04087
0.073333	0.071111	0.087407	0.091111	0.07037	0.056296	0.054815	0.045926	0.062963	0.07037	0.054074	0.06963	0.085926	0.076296	0.055556	0.057037	0.074074	0.073333	0.068889	0.068148	0.065926	0.057037	0.053333	0.046667	0.054074	0.044444	0.025185	0.040741	0.047407	0.054815	0.065926	0.06	0.038519	0.025185	0.031852	0.031852	0.025185	0.025185	0.12444	0.19852	0.20296	0.1837	0.088889	0.044444	0.054074	0.045185	0.031852	0.041481	0.045926	0.034815
0.06625	0.065	0.07875	0.07375	0.049375	0.048125	0.045	0.039375	0.053125	0.05375	0.045	0.0575	0.06875	0.05875	0.044375	0.050625	0.059375	0.05875	0.06	0.05625	0.0575	0.05375	0.04875	0.0475	0.050625	0.038125	0.033125	0.04375	0.045625	0.05625	0.06125	0.039375	0.02375	0.020625	0.025625	0.02625	0.02	0.0175	0.1275	0.19312	0.175	0.13437	0.05625	0.040625	0.034375	0.028125	0.02875	0.03375	0.03375	0.029375
0.061875	0.058125	0.071875	0.073125	0.053125	0.0475	0.05	0.043125	0.0525	0.060625	0.053125	0.06125	0.07125	0.060625	0.043125	0.045625	0.05625	0.058125	0.056875	0.055625	0.05625	0.050625	0.0475	0.043125	0.045625	0.03625	0.023125	0.0375	0.0425	0.04875	0.056875	0.045625	0.03125	0.021875	0.02625	0.02625	0.018125	0.0175	0.11313	0.1775	0.17062	0.14688	0.0675	0.035625	0.040625	0.031875	0.02375	0.033125	0.04	0.03375
0.099091	0.10364	0.10182	0.074545	0.061818	0.056364	0.061818	0.088182	0.081818	0.065455	0.09	0.081818	0.052727	0.055455	0.075455	0.092727	0.081818	0.077273	0.082727	0.088182	0.071818	0.059091	0.064545	0.075455	0.073636	0.055455	0.063636	0.074545	0.081818	0.07	0.05	0.037273	0.036364	0.040909	0.041818	0.10182	0.19727	0.23273	0.25636	0.24182	0.12636	0.051818	0.058182	0.043636	0.035455	0.047273	0.054545	0.055455	0.05	0.036364
0.0728	0.064	0.0584	0.0416	0.0304	0.0304	0.0408	0.0472	0.0536	0.0728	0.0672	0.0584	0.0656	0.0752	0.076	0.084	0.0728	0.0472	0.0616	0.08	0.084	0.08	0.0696	0.0688	0.0904	0.0448	0.0568	0.0544	0.044	0.0368	0.0344	0.0472	0.0544	0.0448	0.0384	0.0376	0.0336	0.0288	0.0248	0.0456	0.1632	0.3072	0.2	0.0296	0.0336	0.064	0.0656	0.0408	0.0392	0.0432
0.065	0.061429	0.057143	0.042143	0.032143	0.034286	0.038571	0.039286	0.040714	0.057857	0.055714	0.05	0.06	0.065	0.065714	0.083571	0.083571	0.051429	0.061429	0.077143	0.078571	0.086429	0.077143	0.067857	0.085714	0.030714	0.027857	0.042143	0.041429	0.032143	0.03	0.044286	0.054286	0.044286	0.039286	0.039286	0.035714	0.032857	0.032857	0.034286	0.061429	0.15786	0.30214	0.19643	0.02	0.04	0.066429	0.055714	0.030714	0.037857
0.042667	0.040667	0.032	0.024	0.032667	0.039333	0.036667	0.039333	0.050667	0.052667	0.056667	0.065333	0.064	0.072667	0.076667	0.052667	0.044	0.064	0.074	0.078667	0.07	0.055333	0.063333	0.074667	0.068667	0.037333	0.036667	0.030667	0.023333	0.028667	0.038	0.048667	0.044667	0.032	0.033333	0.032667	0.022667	0.014667	0.026667	0.098667	0.29867	0.238	0.019333	0.014667	0.045333	0.051333	0.034	0.03	0.038667	0.03
0.073333	0.07	0.063333	0.04	0.0275	0.031667	0.046667	0.05	0.0625	0.078333	0.065833	0.061667	0.066667	0.0725	0.076667	0.089167	0.074167	0.0525	0.0675	0.084167	0.093333	0.080833	0.064167	0.076667	0.1025	0.055833	0.065833	0.053333	0.0375	0.035833	0.0375	0.048333	0.061667	0.053333	0.043333	0.05	0.048333	0.038333	0.025833	0.043333	0.17	0.3225	0.20583	0.025833	0.035833	0.060833	0.063333	0.041667	0.035	0.040833
0.049655	0.048276	0.036552	0.028966	0.037241	0.04	0.038621	0.042069	0.05931	0.05931	0.052414	0.064138	0.066207	0.068966	0.07931	0.067586	0.048276	0.061379	0.073793	0.084828	0.07931	0.05931	0.063448	0.077241	0.07931	0.034483	0.033793	0.047586	0.048276	0.030345	0.022759	0.031034	0.04069	0.047586	0.045517	0.037241	0.036552	0.035862	0.035172	0.021379	0.033103	0.1331	0.31448	0.22138	0.014483	0.023448	0.054483	0.053103	0.031724	0.031724
0.074	0.072	0.087	0.108	0.083	0.067	0.076	0.087	0.099	0.093	0.078	0.085	0.104	0.1	0.078	0.062	0.088	0.094	0.084	0.112	0.099	0.068	0.077	0.075	0.089	0.052	0.056	0.068	0.063	0.205	0.299	0.263	0.194	0.078	0.032	0.04	0.037	0.022	0.026	0.048	0.076	0.076	0.079	0.08	0.058	0.042	0.048	0.044	0.036	0.057
0.078	0.065	0.087	0.105	0.085	0.079	0.088	0.092	0.097	0.098	0.093	0.097	0.098	0.084	0.064	0.089	0.102	0.072	0.081	0.113	0.092	0.07	0.071	0.065	0.097	0.063	0.059	0.051	0.068	0.068	0.062	0.209	0.294	0.254	0.187	0.075	0.038	0.034	0.042	0.033	0.025	0.049	0.073	0.081	0.083	0.075	0.053	0.044	0.069	0.065
0.073	0.075	0.102	0.087	0.076	0.089	0.098	0.103	0.097	0.088	0.096	0.095	0.078	0.069	0.074	0.103	0.094	0.085	0.101	0.081	0.065	0.073	0.074	0.085	0.1	0.062	0.055	0.058	0.064	0.067	0.062	0.131	0.247	0.294	0.241	0.114	0.037	0.036	0.047	0.043	0.029	0.044	0.067	0.08	0.088	0.077	0.052	0.042	0.054	0.059
0.0625	0.09	0.0775	0.061667	0.069167	0.078333	0.0825	0.078333	0.0775	0.0825	0.084167	0.0625	0.045	0.051667	0.080833	0.083333	0.065833	0.083333	0.078333	0.053333	0.061667	0.065833	0.064167	0.095	0.099167	0.044167	0.045833	0.049167	0.056667	0.061667	0.078333	0.19583	0.25	0.22083	0.13167	0.0325	0.036667	0.036667	0.038333	0.034167	0.035	0.051667	0.079167	0.074167	0.06	0.059167	0.038333	0.035	0.049167	0.049167
0.061739	0.067826	0.10087	0.089565	0.05913	0.065217	0.082609	0.082609	0.08087	0.085217	0.086087	0.07913	0.066087	0.056522	0.052174	0.081739	0.083478	0.070435	0.086957	0.075652	0.056522	0.068696	0.070435	0.069565	0.085217	0.047826	0.043478	0.046087	0.053043	0.055652	0.084348	0.2113	0.25826	0.20609	0.12348	0.03913	0.036522	0.038261	0.034783	0.027826	0.03913	0.06	0.077391	0.073913	0.066957	0.058261	0.03913	0.042609	0.053043	0.051304
0.071724	0.066207	0.075172	0.077241	0.077931	0.073103	0.06069	0.062069	0.069655	0.071034	0.067586	0.066207	0.066207	0.071034	0.074483	0.075862	0.069655	0.064828	0.068966	0.068276	0.054483	0.038621	0.045517	0.053793	0.055862	0.022759	0.032414	0.035862	0.038621	0.04	0.035172	0.04069	0.031034	0.0096552	0.053103	0.20276	0.33724	0.37379	0.25517	0.069655	0.014483	0.035172	0.037931	0.037241	0.063448	0.057241	0.035862	0.046897	0.051034	0.04
0.068966	0.070345	0.082069	0.084138	0.073793	0.061379	0.067586	0.068966	0.065517	0.066897	0.066207	0.071034	0.075862	0.072414	0.069655	0.066897	0.067586	0.069655	0.067586	0.057241	0.042069	0.046207	0.052414	0.056552	0.062069	0.024138	0.031034	0.037931	0.041379	0.04	0.032414	0.031724	0.026207	0.010345	0.054483	0.21103	0.34483	0.37517	0.25655	0.068966	0.0096552	0.030345	0.037931	0.037931	0.05931	0.056552	0.036552	0.044138	0.053793	0.042759
0.067857	0.065	0.072857	0.075	0.077857	0.072857	0.058571	0.062857	0.07	0.07	0.071429	0.075714	0.077143	0.077143	0.075714	0.076429	0.071429	0.067143	0.062857	0.065	0.059286	0.043571	0.054286	0.065714	0.065714	0.02	0.028571	0.035	0.034286	0.037857	0.025714	0.0092857	0.038571	0.14429	0.33286	0.31857	0.10357	0.021429	0.017143	0.035	0.050714	0.041429	0.067857	0.068571	0.034286	0.04	0.053571	0.040714	0.044286	0.045
0.061379	0.06	0.062759	0.064828	0.073793	0.073793	0.055172	0.055172	0.065517	0.068276	0.073793	0.075862	0.070345	0.068276	0.070345	0.074483	0.068966	0.061379	0.057931	0.066207	0.064138	0.046897	0.053103	0.068276	0.067586	0.02069	0.021379	0.036552	0.037931	0.033793	0.031724	0.017931	0.016552	0.086207	0.26759	0.33517	0.17379	0.064828	0.032414	0.024828	0.053793	0.043448	0.050345	0.070345	0.046897	0.031724	0.045517	0.043448	0.035862	0.033103
0.061212	0.068485	0.075152	0.076364	0.064848	0.052121	0.060606	0.063636	0.06303	0.06303	0.06	0.063636	0.066667	0.062424	0.059394	0.054545	0.050303	0.053939	0.054545	0.044242	0.038182	0.046667	0.052727	0.057576	0.058182	0.024848	0.02303	0.03697	0.038788	0.029697	0.030909	0.02303	0.009697	0.058788	0.16	0.30364	0.24848	0.095758	0.048485	0.0084848	0.032121	0.033939	0.033333	0.056364	0.048485	0.032727	0.040606	0.046667	0.035758	0.028485
0.1175	0.16	0.125	0.095	0.1325	0.1525	0.105	0.085	0.0925	0.1	0.1125	0.09	0.07	0.0875	0.085	0.1025	0.13	0.095	0.0875	0.1	0.0975	0.1025	0.13	0.15	0.105	0.185	0.0975	0.04	0.115	0.1875	0.1775	0.1175	0.0725	0.0875	0.09	0.0775	0.1025	0.125	0.13	0.11	0.0975	0.0925	0.0775	0.1075	0.105	0.085	0.1275	0.1175	0.075	0.085
0.0975	0.175	0.13	0.095	0.135	0.1225	0.075	0.095	0.105	0.1175	0.1375	0.1025	0.075	0.08	0.085	0.1175	0.1375	0.105	0.1025	0.105	0.0875	0.105	0.145	0.1775	0.1325	0.1425	0.1325	0.07	0.04	0.13	0.1775	0.1525	0.1175	0.1025	0.1325	0.11	0.1	0.125	0.14	0.14	0.12	0.11	0.0875	0.0875	0.1175	0.1025	0.0875	0.1225	0.105	0.075
0.10889	0.16	0.13778	0.097778	0.12667	0.14	0.11111	0.11333	0.11556	0.10889	0.11111	0.086667	0.057778	0.071111	0.088889	0.11111	0.12222	0.091111	0.088889	0.095556	0.077778	0.086667	0.10222	0.11333	0.091111	0.18667	0.12444	0.055556	0.057778	0.13333	0.16667	0.13111	0.093333	0.095556	0.12444	0.1	0.091111	0.11556	0.13111	0.12	0.091111	0.082222	0.073333	0.088889	0.10222	0.091111	0.095556	0.10667	0.077778	0.062222
0.11111	0.095556	0.084444	0.11111	0.12667	0.11333	0.10444	0.084444	0.088889	0.1	0.077778	0.075556	0.08	0.084444	0.1	0.12889	0.10222	0.084444	0.10889	0.097778	0.10444	0.12889	0.14222	0.14222	0.10667	0.20222	0.13111	0.057778	0.088889	0.16222	0.17333	0.12444	0.086667	0.086667	0.084444	0.08	0.10222	0.11111	0.11778	0.1	0.086667	0.08	0.053333	0.091111	0.11556	0.075556	0.10667	0.11778	0.064444	0.064444
0.076364	0.12	0.089091	0.081818	0.10909	0.094545	0.078182	0.096364	0.089091	0.089091	0.094545	0.065455	0.04	0.06	0.074545	0.085455	0.094545	0.08	0.072727	0.072727	0.074545	0.090909	0.11273	0.12727	0.090909	0.14909	0.10545	0.047273	0.049091	0.11273	0.14909	0.11636	0.083636	0.074545	0.085455	0.08	0.085455	0.098182	0.10182	0.094545	0.081818	0.076364	0.058182	0.070909	0.096364	0.070909	0.067273	0.087273	0.063636	0.047273
0.13	0.13	0.07	0.0625	0.13	0.15	0.1375	0.1325	0.12	0.15	0.135	0.1025	0.11	0.1225	0.12	0.105	0.1	0.08	0.1125	0.1575	0.1225	0.11	0.1125	0.1025	0.1375	0.14	0.085	0.1075	0.1525	0.13	0.0775	0.06	0.085	0.1225	0.1075	0.1	0.13	0.135	0.145	0.19	0.195	0.14	0.1625	0.145	0.065	0.0675	0.1125	0.1325	0.1125	0.08
0.1475	0.0725	0.05	0.0975	0.13	0.12	0.1225	0.13	0.1375	0.1275	0.115	0.1225	0.12	0.1175	0.115	0.0975	0.0725	0.1025	0.1425	0.125	0.1075	0.1175	0.1175	0.1075	0.12	0.125	0.0825	0.135	0.155	0.0975	0.0725	0.11	0.1275	0.12	0.1	0.1025	0.1075	0.1	0.14	0.1625	0.135	0.14	0.14	0.0825	0.0525	0.0925	0.1325	0.125	0.105	0.095
0.10222	0.11333	0.10667	0.11556	0.13778	0.13778	0.13111	0.13333	0.11333	0.10444	0.10889	0.095556	0.084444	0.095556	0.084444	0.077778	0.11556	0.12889	0.10444	0.097778	0.097778	0.086667	0.10444	0.12444	0.12222	0.14444	0.14	0.13778	0.10667	0.073333	0.084444	0.1	0.1	0.1	0.11111	0.10667	0.11778	0.14222	0.16222	0.16222	0.15556	0.12667	0.055556	0.042222	0.077778	0.11778	0.11556	0.082222	0.095556	0.10667
0.1	0.057778	0.06	0.097778	0.12667	0.13556	0.13778	0.13556	0.14667	0.12444	0.088889	0.097778	0.10667	0.10444	0.091111	0.073333	0.073333	0.10667	0.12444	0.10444	0.10667	0.10444	0.091111	0.10444	0.10889	0.13556	0.12667	0.1	0.06	0.06	0.091111	0.10222	0.082222	0.10667	0.12444	0.11556	0.15333	0.18222	0.16222	0.12667	0.13333	0.11111	0.048889	0.066667	0.1	0.084444	0.073333	0.091111	0.14889	0.11778
0.091111	0.055556	0.1	0.11333	0.11333	0.12222	0.11556	0.12667	0.12444	0.11778	0.12	0.091111	0.071111	0.084444	0.068889	0.042222	0.084444	0.13333	0.11333	0.10667	0.11778	0.093333	0.088889	0.10667	0.11111	0.12	0.073333	0.11333	0.13111	0.1	0.071111	0.077778	0.10889	0.11111	0.088889	0.11333	0.12222	0.097778	0.11778	0.14667	0.15111	0.13778	0.11111	0.062222	0.031111	0.071111	0.13333	0.11778	0.073333	0.064444
0.05375	0.03875	0.045	0.08875	0.1325	0.095	0.03875	0.03375	0.04375	0.05875	0.0675	0.05625	0.05	0.04625	0.055	0.0625	0.0625	0.0675	0.05875	0.03625	0.0275	0.0375	0.045	0.03875	0.0475	0.05625	0.04625	0.07	0.06375	0.0375	0.04	0.08625	0.11125	0.06	0.03	0.055	0.0775	0.0775	0.07625	0.06	0.0425	0.04	0.0425	0.0475	0.05875	0.06625	0.05	0.03	0.035	0.055
0.0475	0.06125	0.05625	0.04	0.05625	0.1075	0.11875	0.065	0.03125	0.03625	0.05	0.07	0.0775	0.08	0.07125	0.0575	0.055	0.05875	0.0575	0.05125	0.045	0.02875	0.02875	0.0525	0.055	0.05	0.0425	0.06	0.05875	0.045	0.04375	0.0825	0.1125	0.07	0.04125	0.0675	0.085	0.08	0.08	0.06125	0.0375	0.03875	0.04	0.04	0.055	0.0625	0.04625	0.02875	0.04125	0.065
0.04	0.042353	0.04	0.044706	0.10118	0.12235	0.062353	0.024706	0.035294	0.047059	0.061176	0.062353	0.051765	0.050588	0.049412	0.048235	0.052941	0.054118	0.049412	0.045882	0.035294	0.032941	0.042353	0.042353	0.042353	0.062353	0.049412	0.055294	0.06	0.04	0.027059	0.069412	0.10471	0.063529	0.032941	0.047059	0.065882	0.070588	0.074118	0.057647	0.031765	0.032941	0.04	0.042353	0.052941	0.061176	0.043529	0.02	0.029412	0.050588
0.052941	0.068235	0.065882	0.045882	0.055294	0.10706	0.11412	0.06	0.037647	0.042353	0.043529	0.06	0.070588	0.061176	0.047059	0.049412	0.058824	0.063529	0.049412	0.037647	0.044706	0.044706	0.04	0.04	0.049412	0.075294	0.034118	0.029412	0.043529	0.052941	0.041176	0.034118	0.06	0.097647	0.085882	0.050588	0.048235	0.051765	0.077647	0.085882	0.057647	0.047059	0.047059	0.049412	0.047059	0.047059	0.064706	0.055294	0.031765	0.043529
0.04625	0.0625	0.04625	0.02875	0.075	0.125	0.10625	0.0525	0.0375	0.04625	0.05625	0.0725	0.075	0.07125	0.06	0.0575	0.0525	0.0525	0.0575	0.05625	0.04875	0.0275	0.0275	0.045	0.04625	0.05	0.03375	0.0575	0.05	0.04125	0.05	0.08625	0.1075	0.0625	0.035	0.05875	0.07875	0.075	0.0775	0.06125	0.0375	0.04	0.0475	0.05	0.0625	0.06625	0.0475	0.0275	0.0375	0.05875
0.0725	0.0625	0.1175	0.115	0.055	0.0475	0.055	0.0475	0.0475	0.055	0.055	0.07	0.085	0.075	0.065	0.075	0.08	0.09	0.1125	0.105	0.115	0.115	0.105	0.1425	0.1	0.0625	0.0775	0.0675	0.0875	0.11	0.095	0.0825	0.095	0.08	0.0425	0.05	0.0675	0.065	0.095	0.1025	0.0875	0.08	0.08	0.075	0.05	0.065	0.0925	0.1325	0.1275	0.0825
0.11667	0.066667	0.12	0.16667	0.11333	0.063333	0.07	0.083333	0.1	0.10667	0.083333	0.093333	0.11333	0.10333	0.096667	0.13667	0.14333	0.12667	0.13667	0.13333	0.14	0.13667	0.11	0.12	0.10333	0.11333	0.12667	0.14333	0.12667	0.11	0.12667	0.10667	0.063333	0.06	0.076667	0.11	0.13333	0.12667	0.12667	0.10333	0.10667	0.11	0.073333	0.073333	0.086667	0.13667	0.15	0.14333	0.18	0.11667
0.13143	0.11143	0.071429	0.11429	0.12286	0.077143	0.074286	0.085714	0.077143	0.068571	0.074286	0.074286	0.068571	0.077143	0.088571	0.094286	0.097143	0.088571	0.1	0.13143	0.13429	0.12	0.085714	0.082857	0.10286	0.071429	0.065714	0.094286	0.10571	0.11429	0.13143	0.14571	0.097143	0.04	0.054286	0.077143	0.085714	0.091429	0.088571	0.088571	0.091429	0.091429	0.06	0.065714	0.10286	0.12857	0.14857	0.12571	0.14571	0.10571
0.11667	0.066667	0.12667	0.16	0.093333	0.063333	0.086667	0.083333	0.063333	0.08	0.09	0.10333	0.12	0.11667	0.11333	0.11667	0.11667	0.12667	0.14333	0.13333	0.14667	0.15667	0.13	0.15	0.11667	0.096667	0.10667	0.13	0.12333	0.11333	0.14333	0.11333	0.056667	0.07	0.1	0.14667	0.15333	0.12	0.11333	0.096667	0.10333	0.083333	0.05	0.08	0.12	0.15667	0.15	0.15	0.17	0.10667
0.16	0.16	0.11667	0.12667	0.14667	0.1	0.073333	0.09	0.086667	0.076667	0.12	0.11667	0.073333	0.096667	0.10667	0.11667	0.11333	0.093333	0.11	0.14667	0.16333	0.14	0.11667	0.11667	0.12	0.076667	0.073333	0.11667	0.15333	0.14667	0.17	0.19	0.12	0.056667	0.07	0.1	0.12333	0.14	0.13	0.10667	0.11333	0.11333	0.056667	0.073333	0.10333	0.12333	0.18	0.16333	0.18667	0.13333
0.050769	0.052308	0.064615	0.11231	0.23231	0.24308	0.15231	0.12769	0.12308	0.11077	0.12615	0.14462	0.13846	0.14615	0.19077	0.21385	0.18154	0.17077	0.16769	0.12769	0.067692	0.081538	0.13385	0.13385	0.1	0.072308	0.067692	0.18308	0.24	0.15231	0.11385	0.16462	0.16769	0.19077	0.23538	0.17846	0.096923	0.061538	0.13385	0.16923	0.090769	0.081538	0.096923	0.076923	0.10308	0.15538	0.16615	0.12769	0.093846	0.076923
0.056923	0.056923	0.055385	0.076923	0.18154	0.25231	0.19385	0.13385	0.11692	0.10923	0.12154	0.16154	0.18462	0.16923	0.18	0.23231	0.19692	0.14769	0.14923	0.12769	0.095385	0.055385	0.092308	0.14923	0.10615	0.10615	0.056923	0.061538	0.093846	0.19385	0.20769	0.12308	0.10923	0.14615	0.15538	0.20462	0.23231	0.19692	0.15846	0.096923	0.15077	0.17692	0.098462	0.095385	0.1	0.087692	0.12923	0.16154	0.13538	0.086154
0.056	0.049333	0.044	0.065333	0.14133	0.21067	0.18933	0.13067	0.10133	0.093333	0.097333	0.13067	0.152	0.14133	0.156	0.20533	0.17867	0.13067	0.12933	0.11067	0.068	0.038667	0.082667	0.12533	0.090667	0.073333	0.054667	0.070667	0.132	0.18133	0.148	0.097333	0.11067	0.132	0.15067	0.19333	0.17467	0.13333	0.093333	0.096	0.14533	0.10533	0.08	0.093333	0.074667	0.084	0.136	0.14	0.10267	0.077333
0.053333	0.052	0.061333	0.06	0.10267	0.18667	0.196	0.13467	0.097333	0.086667	0.088	0.116	0.136	0.13467	0.14667	0.204	0.19733	0.13733	0.12533	0.128	0.096	0.041333	0.069333	0.11867	0.092	0.06	0.057333	0.081333	0.14533	0.17467	0.12533	0.092	0.12667	0.148	0.15467	0.18533	0.156	0.112	0.082667	0.10533	0.14667	0.096	0.078667	0.089333	0.070667	0.088	0.144	0.144	0.104	0.073333
0.06	0.063333	0.065	0.055	0.096667	0.18667	0.24667	0.19833	0.12833	0.11667	0.11833	0.135	0.14667	0.17333	0.19	0.23333	0.26	0.19	0.16	0.185	0.16167	0.096667	0.081667	0.125	0.11667	0.11	0.05	0.076667	0.12833	0.21333	0.185	0.105	0.13667	0.18333	0.19	0.23667	0.23667	0.19	0.14333	0.10833	0.17667	0.16667	0.093333	0.105	0.095	0.076667	0.14333	0.18167	0.14167	0.1
0.128	0.092	0.152	0.208	0.196	0.196	0.164	0.116	0.108	0.12	0.104	0.084	0.088	0.132	0.168	0.112	0.092	0.104	0.112	0.096	0.052	0.116	0.132	0.124	0.112	0.14	0.132	0.136	0.14	0.116	0.088	0.148	0.172	0.116	0.08	0.092	0.144	0.16	0.148	0.1	0.064	0.088	0.12	0.148	0.128	0.108	0.184	0.18	0.132	0.112
0.073333	0.056667	0.13	0.16667	0.13667	0.14333	0.16667	0.12333	0.083333	0.08	0.083333	0.10667	0.11333	0.10667	0.1	0.06	0.046667	0.1	0.10667	0.053333	0.043333	0.1	0.10667	0.08	0.063333	0.083333	0.083333	0.08	0.07	0.12667	0.15333	0.11333	0.076667	0.06	0.10667	0.13	0.1	0.086667	0.056667	0.063333	0.086667	0.12	0.13	0.093333	0.12667	0.12667	0.10333	0.08	0.063333	0.076667
0.10667	0.07	0.11667	0.16667	0.14	0.14	0.15667	0.11	0.07	0.076667	0.073333	0.073333	0.086667	0.10667	0.10667	0.053333	0.06	0.093333	0.093333	0.073333	0.05	0.11667	0.13333	0.10667	0.083333	0.086667	0.096667	0.096667	0.083333	0.06	0.083333	0.14667	0.14333	0.083333	0.053333	0.10333	0.13667	0.12	0.11	0.066667	0.063333	0.093333	0.12333	0.12	0.083333	0.1	0.14	0.11333	0.086667	0.10333
0.14	0.14	0.112	0.164	0.204	0.192	0.18	0.184	0.124	0.104	0.12	0.104	0.096	0.124	0.128	0.088	0.06	0.072	0.1	0.112	0.072	0.06	0.128	0.14	0.084	0.124	0.132	0.112	0.1	0.18	0.184	0.096	0.064	0.092	0.148	0.148	0.092	0.048	0.064	0.092	0.108	0.132	0.116	0.12	0.196	0.172	0.124	0.1	0.092	0.108
0.1	0.14	0.156	0.1	0.164	0.188	0.156	0.168	0.144	0.104	0.116	0.124	0.104	0.116	0.116	0.124	0.104	0.052	0.068	0.116	0.116	0.072	0.072	0.12	0.12	0.108	0.132	0.144	0.104	0.108	0.172	0.2	0.136	0.064	0.096	0.176	0.164	0.12	0.072	0.048	0.08	0.104	0.128	0.124	0.136	0.144	0.116	0.08	0.08	0.124
0.18	0.2	0.09	0.045	0.215	0.255	0.095	0.05	0.075	0.14	0.19	0.135	0.08	0.09	0.08	0.105	0.13	0.09	0.06	0.05	0.075	0.115	0.125	0.155	0.13	0.175	0.145	0.08	0.11	0.155	0.14	0.135	0.15	0.13	0.13	0.145	0.12	0.09	0.06	0.09	0.15	0.115	0.085	0.075	0.09	0.11	0.115	0.105	0.115	0.125
0.15	0.03	0.07	0.21	0.21	0.085	0.075	0.115	0.195	0.18	0.075	0.05	0.05	0.09	0.14	0.12	0.075	0.075	0.09	0.065	0.06	0.115	0.16	0.115	0.095	0.125	0.12	0.12	0.115	0.12	0.13	0.145	0.13	0.12	0.14	0.13	0.13	0.15	0.145	0.11	0.09	0.11	0.125	0.105	0.09	0.095	0.095	0.085	0.08	0.08
0.11	0.02	0.08	0.235	0.235	0.11	0.07	0.09	0.2	0.205	0.11	0.085	0.07	0.055	0.065	0.075	0.06	0.06	0.06	0.07	0.13	0.145	0.125	0.105	0.09	0.14	0.135	0.085	0.085	0.12	0.115	0.1	0.12	0.135	0.135	0.18	0.16	0.1	0.07	0.08	0.11	0.095	0.095	0.075	0.095	0.115	0.075	0.08	0.12	0.115
0.13	0.1	0.05	0.135	0.3	0.23	0.065	0.065	0.12	0.175	0.16	0.1	0.08	0.06	0.07	0.125	0.095	0.055	0.045	0.04	0.07	0.09	0.07	0.115	0.125	0.18	0.175	0.09	0.07	0.125	0.13	0.1	0.125	0.135	0.1	0.115	0.095	0.05	0.045	0.095	0.14	0.105	0.085	0.09	0.11	0.11	0.08	0.075	0.095	0.095
0.125	0.005	0.125	0.265	0.19	0.065	0.08	0.13	0.2	0.18	0.06	0.03	0.04	0.07	0.115	0.115	0.08	0.085	0.105	0.07	0.065	0.125	0.16	0.13	0.12	0.1	0.09	0.105	0.1	0.125	0.145	0.13	0.125	0.145	0.125	0.11	0.17	0.2	0.15	0.105	0.135	0.135	0.125	0.115	0.09	0.1	0.09	0.085	0.09	0.09
0.14154	0.11077	0.076923	0.10923	0.12769	0.066154	0.073846	0.14308	0.18308	0.14923	0.078462	0.078462	0.10769	0.11846	0.095385	0.055385	0.083077	0.10462	0.083077	0.096923	0.1	0.08	0.095385	0.12615	0.11385	0.11846	0.14154	0.12154	0.11538	0.13846	0.10615	0.076923	0.08	0.10154	0.11231	0.10308	0.12	0.13231	0.11538	0.1	0.092308	0.061538	0.11077	0.13692	0.087692	0.098462	0.12154	0.13077	0.098462	0.052308
0.18667	0.135	0.10333	0.14167	0.145	0.071667	0.10167	0.17667	0.205	0.16833	0.096667	0.10167	0.14	0.145	0.096667	0.053333	0.105	0.13333	0.098333	0.08	0.071667	0.075	0.095	0.11667	0.125	0.17667	0.15833	0.15667	0.15	0.10667	0.105	0.093333	0.115	0.135	0.11333	0.13167	0.11833	0.083333	0.10167	0.098333	0.071667	0.135	0.15	0.115	0.11167	0.10667	0.12167	0.098333	0.076667	0.105
0.15818	0.15091	0.13818	0.10909	0.14727	0.12182	0.074545	0.13273	0.20909	0.21455	0.14	0.098182	0.094545	0.14909	0.15636	0.089091	0.08	0.12545	0.11455	0.096364	0.11091	0.081818	0.085455	0.14	0.13273	0.15818	0.12182	0.11273	0.14545	0.13818	0.11273	0.12	0.10727	0.13273	0.13818	0.13636	0.17636	0.18182	0.13636	0.1	0.10909	0.098182	0.14	0.13636	0.12727	0.14	0.13636	0.14182	0.094545	0.089091
0.12	0.10933	0.104	0.084	0.11867	0.12	0.052	0.064	0.128	0.16	0.124	0.073333	0.053333	0.098667	0.12533	0.068	0.033333	0.08	0.096	0.058667	0.054667	0.061333	0.06	0.065333	0.076	0.11333	0.073333	0.10267	0.1	0.076	0.085333	0.081333	0.094667	0.112	0.116	0.10933	0.08	0.058667	0.076	0.08	0.073333	0.094667	0.08	0.093333	0.10533	0.085333	0.077333	0.070667	0.077333	0.070667
0.15333	0.135	0.098333	0.12333	0.12	0.056667	0.10333	0.17333	0.19333	0.16167	0.083333	0.09	0.13667	0.14333	0.098333	0.046667	0.098333	0.12667	0.096667	0.10833	0.11167	0.08	0.096667	0.155	0.15167	0.13167	0.14333	0.14833	0.12	0.15	0.14167	0.1	0.10333	0.091667	0.11	0.12167	0.11167	0.11667	0.13667	0.12	0.10333	0.1	0.083333	0.13667	0.13	0.11667	0.11833	0.11	0.135	0.088333
0.11333	0.046667	0.036667	0.081667	0.12	0.14333	0.12333	0.1	0.115	0.088333	0.085	0.096667	0.083333	0.12	0.16167	0.12833	0.086667	0.11333	0.12167	0.10333	0.09	0.10333	0.14	0.12833	0.105	0.10833	0.053333	0.038333	0.10167	0.16333	0.15667	0.095	0.095	0.12833	0.11667	0.12	0.081667	0.04	0.10167	0.155	0.10667	0.058333	0.081667	0.12333	0.12833	0.11333	0.105	0.10667	0.078333	0.11
0.13833	0.088333	0.046667	0.071667	0.10833	0.12667	0.12667	0.12167	0.125	0.10167	0.1	0.105	0.09	0.10333	0.14	0.15	0.105	0.10167	0.125	0.11667	0.105	0.11333	0.13167	0.13	0.12833	0.11	0.068333	0.10667	0.165	0.15	0.10167	0.096667	0.11167	0.096667	0.12333	0.10167	0.091667	0.13	0.17167	0.14833	0.055	0.066667	0.13	0.145	0.14833	0.12833	0.095	0.09	0.12167	0.12
0.085714	0.044286	0.062857	0.098571	0.098571	0.098571	0.098571	0.09	0.08	0.074286	0.071429	0.09	0.10857	0.13857	0.13714	0.077143	0.084286	0.11571	0.095714	0.077143	0.087143	0.11	0.12143	0.14286	0.10286	0.091429	0.05	0.037143	0.091429	0.14429	0.12571	0.082857	0.094286	0.11714	0.11714	0.11429	0.078571	0.054286	0.1	0.13857	0.098571	0.052857	0.07	0.11	0.11	0.094286	0.078571	0.075714	0.065714	0.094286
0.155	0.135	0.071667	0.055	0.093333	0.10833	0.11667	0.115	0.10667	0.11333	0.105	0.085	0.076667	0.093333	0.13667	0.15167	0.105	0.10333	0.12	0.093333	0.088333	0.11333	0.11	0.096667	0.125	0.14	0.115	0.046667	0.061667	0.14667	0.16167	0.105	0.093333	0.105	0.096667	0.12833	0.12333	0.073333	0.075	0.12167	0.16833	0.1	0.048333	0.093333	0.12333	0.12667	0.13333	0.11167	0.083333	0.11
0.12182	0.054545	0.058182	0.087273	0.11636	0.14364	0.12	0.092727	0.11455	0.10909	0.10727	0.10364	0.087273	0.13818	0.17818	0.12727	0.10909	0.13818	0.11455	0.098182	0.10182	0.10364	0.12545	0.16	0.14909	0.11818	0.10364	0.087273	0.052727	0.10182	0.16545	0.17273	0.13455	0.10727	0.11455	0.11636	0.15091	0.18182	0.11091	0.061818	0.15091	0.17273	0.072727	0.054545	0.11455	0.14	0.15455	0.14	0.10727	0.096364
0.13538	0.066154	0.072308	0.083077	0.096923	0.095385	0.084615	0.069231	0.066154	0.098462	0.11538	0.086154	0.058462	0.087692	0.1	0.066154	0.086154	0.12308	0.11077	0.12	0.11231	0.095385	0.10154	0.08	0.08	0.10308	0.11846	0.11692	0.095385	0.083077	0.061538	0.087692	0.12	0.11231	0.084615	0.064615	0.084615	0.10462	0.093846	0.086154	0.10462	0.098462	0.08	0.095385	0.087692	0.084615	0.10462	0.10615	0.11077	0.1
0.16182	0.10182	0.096364	0.11273	0.13455	0.12	0.10727	0.096364	0.085455	0.11636	0.13273	0.11455	0.10545	0.12	0.11818	0.10545	0.13273	0.17818	0.14909	0.12909	0.12545	0.10545	0.10909	0.089091	0.092727	0.12909	0.18909	0.15273	0.12364	0.092727	0.065455	0.13818	0.16364	0.13455	0.11273	0.10909	0.12909	0.12	0.08	0.08	0.13273	0.11091	0.10182	0.11273	0.1	0.12727	0.15273	0.12727	0.11273	0.12364
0.21	0.1225	0.105	0.1275	0.1575	0.175	0.155	0.1625	0.1375	0.12	0.1775	0.1625	0.1	0.14	0.18	0.1475	0.135	0.17	0.1925	0.1625	0.15	0.1675	0.17	0.14	0.11	0.1925	0.12	0.165	0.14	0.085	0.1875	0.2175	0.155	0.12	0.1425	0.175	0.12	0.08	0.15	0.2	0.1375	0.135	0.155	0.13	0.1475	0.155	0.1475	0.155	0.1425	0.16
0.164	0.094	0.1	0.128	0.154	0.134	0.098	0.094	0.112	0.134	0.126	0.11	0.112	0.122	0.104	0.1	0.132	0.164	0.15	0.124	0.118	0.124	0.12	0.092	0.11	0.154	0.14	0.136	0.14	0.12	0.096	0.132	0.144	0.126	0.104	0.086	0.104	0.124	0.108	0.108	0.144	0.13	0.1	0.112	0.106	0.11	0.136	0.138	0.14	0.13
0.16364	0.1	0.092727	0.11636	0.13273	0.11091	0.098182	0.089091	0.092727	0.11636	0.11818	0.11091	0.11273	0.11818	0.10182	0.087273	0.11273	0.14727	0.13273	0.12364	0.11273	0.096364	0.10727	0.092727	0.11273	0.12545	0.15091	0.13091	0.13091	0.10182	0.063636	0.12	0.15091	0.12727	0.096364	0.087273	0.11818	0.13091	0.094545	0.083636	0.12727	0.11273	0.094545	0.11818	0.11636	0.11455	0.13273	0.12727	0.12182	0.12
0.08	0.057778	0.084444	0.085556	0.06	0.053333	0.075556	0.084444	0.064444	0.052222	0.11889	0.13111	0.082222	0.076667	0.053333	0.045556	0.05	0.053333	0.055556	0.036667	0.041111	0.11556	0.14111	0.083333	0.056667	0.05	0.086667	0.10222	0.071111	0.063333	0.06	0.05	0.061111	0.09	0.063333	0.037778	0.05	0.048889	0.065556	0.095556	0.10556	0.071111	0.04	0.054444	0.084444	0.10556	0.10333	0.078889	0.072222	0.098889
0.07375	0.085	0.10125	0.07625	0.0725	0.08	0.0875	0.08125	0.0475	0.1	0.145	0.1	0.0675	0.0625	0.0525	0.0625	0.0725	0.0575	0.04	0.04625	0.105	0.175	0.12625	0.0475	0.065	0.07125	0.08375	0.10125	0.08125	0.0725	0.0725	0.06875	0.05875	0.08875	0.07375	0.0475	0.05875	0.0525	0.0625	0.105	0.12	0.0825	0.0525	0.05875	0.09375	0.11	0.1025	0.08625	0.075	0.10375
0.090667	0.070667	0.08	0.10133	0.085333	0.068	0.077333	0.096	0.097333	0.070667	0.081333	0.148	0.17867	0.13733	0.085333	0.056	0.045333	0.057333	0.064	0.044	0.033333	0.08	0.14533	0.156	0.096	0.072	0.097333	0.10667	0.074667	0.068	0.066667	0.061333	0.08	0.10267	0.074667	0.056	0.06	0.050667	0.08	0.13067	0.12267	0.065333	0.049333	0.084	0.10533	0.11467	0.11467	0.088	0.068	0.096
0.07	0.055556	0.083333	0.093333	0.071111	0.051111	0.07	0.087778	0.061111	0.045556	0.11889	0.12333	0.062222	0.055556	0.042222	0.044444	0.054444	0.065556	0.057778	0.032222	0.057778	0.15	0.17333	0.097778	0.052222	0.081111	0.078889	0.072222	0.067778	0.065556	0.05	0.072222	0.087778	0.051111	0.051111	0.058889	0.07	0.091111	0.10444	0.095556	0.054444	0.047778	0.071111	0.08	0.095556	0.094444	0.067778	0.088889	0.12889	0.09
0.068889	0.063333	0.088889	0.095556	0.071111	0.054444	0.072222	0.083333	0.056667	0.05	0.12444	0.12444	0.066667	0.06	0.046667	0.04	0.047778	0.073333	0.066667	0.031111	0.06	0.15556	0.15778	0.074444	0.05	0.086667	0.076667	0.065556	0.057778	0.063333	0.054444	0.063333	0.082222	0.053333	0.045556	0.057778	0.072222	0.088889	0.10556	0.095556	0.048889	0.041111	0.062222	0.072222	0.10222	0.11	0.081111	0.091111	0.12778	0.1
0.112	0.088	0.084	0.136	0.176	0.144	0.112	0.136	0.148	0.14	0.132	0.116	0.104	0.124	0.108	0.104	0.128	0.14	0.124	0.152	0.188	0.224	0.276	0.208	0.088	0.14	0.112	0.116	0.156	0.18	0.148	0.152	0.152	0.112	0.088	0.136	0.184	0.184	0.176	0.144	0.108	0.1	0.116	0.132	0.16	0.156	0.12	0.108	0.116	0.16
0.064	0.096	0.156	0.148	0.124	0.132	0.12	0.116	0.144	0.144	0.12	0.108	0.088	0.084	0.1	0.14	0.116	0.112	0.14	0.176	0.204	0.152	0.06	0.016	0.184	0.148	0.108	0.104	0.148	0.16	0.136	0.112	0.092	0.072	0.096	0.168	0.192	0.184	0.128	0.076	0.092	0.116	0.124	0.12	0.108	0.1	0.12	0.144	0.156	0.164
0.085	0.165	0.22	0.22	0.18	0.175	0.18	0.165	0.16	0.15	0.17	0.17	0.14	0.115	0.115	0.17	0.14	0.155	0.195	0.2	0.23	0.175	0.07	0.02	0.24	0.175	0.145	0.12	0.175	0.245	0.21	0.17	0.16	0.13	0.14	0.21	0.245	0.26	0.205	0.15	0.135	0.125	0.125	0.13	0.14	0.125	0.11	0.135	0.17	0.21
0.056	0.124	0.208	0.192	0.128	0.124	0.16	0.14	0.116	0.116	0.104	0.124	0.128	0.104	0.076	0.064	0.08	0.096	0.12	0.156	0.216	0.224	0.108	0.02	0.136	0.128	0.112	0.128	0.096	0.14	0.164	0.152	0.144	0.112	0.088	0.088	0.128	0.144	0.176	0.168	0.124	0.116	0.116	0.128	0.16	0.14	0.096	0.092	0.088	0.108
0.072	0.096	0.172	0.156	0.112	0.128	0.168	0.148	0.128	0.148	0.144	0.128	0.096	0.084	0.08	0.108	0.128	0.12	0.16	0.172	0.164	0.192	0.12	0.028	0.164	0.128	0.136	0.12	0.128	0.184	0.168	0.168	0.172	0.104	0.076	0.116	0.156	0.176	0.168	0.148	0.12	0.104	0.112	0.124	0.136	0.116	0.096	0.104	0.1	0.156
0.084444	0.085556	0.12222	0.11778	0.087778	0.10556	0.12333	0.096667	0.082222	0.082222	0.058889	0.067778	0.091111	0.12444	0.12333	0.077778	0.053333	0.036667	0.046667	0.07	0.061111	0.058889	0.08	0.083333	0.082222	0.092222	0.08	0.058889	0.057778	0.071111	0.056667	0.064444	0.082222	0.10111	0.092222	0.076667	0.10444	0.12	0.11222	0.09	0.083333	0.098889	0.12444	0.092222	0.058889	0.075556	0.085556	0.075556	0.071111	0.094444
0.11467	0.10133	0.14267	0.14267	0.10533	0.124	0.15467	0.12667	0.096	0.10533	0.084	0.081333	0.10667	0.13067	0.13067	0.098667	0.068	0.048	0.062667	0.090667	0.08	0.064	0.089333	0.097333	0.092	0.12	0.084	0.077333	0.086667	0.082667	0.076	0.074667	0.094667	0.124	0.112	0.12533	0.14667	0.13867	0.11867	0.090667	0.1	0.13467	0.12667	0.08	0.088	0.10667	0.090667	0.077333	0.1	0.11067
0.091579	0.095789	0.083158	0.10421	0.13158	0.10526	0.075789	0.087368	0.078947	0.068421	0.093684	0.10526	0.096842	0.089474	0.06	0.034737	0.047368	0.082105	0.074737	0.057895	0.067368	0.076842	0.069474	0.061053	0.066316	0.081053	0.065263	0.051579	0.057895	0.055789	0.049474	0.071579	0.10737	0.097895	0.081053	0.10211	0.10316	0.084211	0.074737	0.078947	0.10842	0.10105	0.056842	0.055789	0.064211	0.061053	0.081053	0.10211	0.11789	0.087368
0.1	0.08	0.12154	0.11385	0.14	0.18769	0.16615	0.12769	0.11846	0.093846	0.083077	0.15077	0.20308	0.17385	0.11692	0.083077	0.053846	0.052308	0.08	0.075385	0.075385	0.10154	0.11231	0.090769	0.096923	0.11385	0.11077	0.10154	0.072308	0.08	0.090769	0.083077	0.073846	0.095385	0.13231	0.12308	0.11692	0.12308	0.15385	0.15231	0.11231	0.12	0.16308	0.14615	0.075385	0.076923	0.10615	0.10308	0.089231	0.10923
0.17273	0.20364	0.16182	0.15273	0.22727	0.23455	0.15273	0.11818	0.12	0.096364	0.14364	0.19455	0.17455	0.17455	0.13091	0.070909	0.050909	0.081818	0.10364	0.092727	0.10545	0.12909	0.10909	0.098182	0.12909	0.14	0.16	0.13818	0.074545	0.089091	0.10364	0.094545	0.083636	0.12545	0.15818	0.14182	0.16	0.17455	0.19455	0.17273	0.13818	0.16545	0.21455	0.17818	0.10364	0.10727	0.11091	0.12364	0.13091	0.13091
0.030526	0.051579	0.051579	0.035789	0.029474	0.037895	0.043158	0.028421	0.072632	0.19474	0.24105	0.18105	0.14316	0.10947	0.097895	0.094737	0.049474	0.074737	0.097895	0.056842	0.050526	0.06	0.053684	0.074737	0.068421	0.034737	0.026316	0.04	0.077895	0.11474	0.094737	0.066316	0.095789	0.14526	0.11474	0.044211	0.046316	0.069474	0.075789	0.10421	0.11053	0.086316	0.081053	0.070526	0.067368	0.075789	0.069474	0.068421	0.075789	0.072632
0.025263	0.045263	0.046316	0.033684	0.028421	0.030526	0.042105	0.034737	0.063158	0.18842	0.24842	0.18737	0.14737	0.10632	0.081053	0.089474	0.062105	0.077895	0.10105	0.062105	0.048421	0.061053	0.053684	0.068421	0.063158	0.036842	0.030526	0.041053	0.072632	0.11474	0.096842	0.062105	0.086316	0.13684	0.11579	0.049474	0.050526	0.073684	0.076842	0.10316	0.11895	0.092632	0.077895	0.069474	0.066316	0.074737	0.061053	0.052632	0.063158	0.066316
0.032174	0.028696	0.023478	0.023478	0.029565	0.022609	0.053043	0.15304	0.19913	0.14957	0.08087	0.05913	0.073043	0.073913	0.054783	0.071304	0.091304	0.053913	0.044348	0.056522	0.042609	0.035652	0.027826	0.023478	0.046957	0.033043	0.028696	0.025217	0.036522	0.08	0.10261	0.065217	0.050435	0.090435	0.10522	0.065217	0.041739	0.043478	0.052174	0.063478	0.093913	0.085217	0.066957	0.062609	0.042609	0.06	0.076522	0.06	0.05913	0.050435
0.047	0.042	0.038	0.036	0.037	0.027	0.092	0.2	0.212	0.144	0.082	0.084	0.108	0.083	0.047	0.09	0.114	0.059	0.042	0.045	0.032	0.028	0.024	0.032	0.055	0.049	0.043	0.037	0.038	0.073	0.117	0.091	0.063	0.096	0.118	0.092	0.05	0.034	0.047	0.066	0.1	0.115	0.099	0.081	0.051	0.052	0.079	0.067	0.049	0.04
0.023478	0.023478	0.01913	0.02	0.030435	0.028696	0.031304	0.10783	0.19217	0.17391	0.10435	0.065217	0.05913	0.083478	0.073913	0.056522	0.084348	0.074783	0.047826	0.048696	0.043478	0.046087	0.046957	0.023478	0.052174	0.030435	0.021739	0.026957	0.054783	0.097391	0.088696	0.055652	0.064348	0.10174	0.093913	0.043478	0.038261	0.053913	0.05913	0.081739	0.10609	0.087826	0.063478	0.053913	0.047826	0.06087	0.06	0.050435	0.062609	0.061739
0.072308	0.090769	0.087692	0.064615	0.055385	0.067692	0.078462	0.070769	0.087692	0.14923	0.24615	0.20308	0.095385	0.083077	0.076923	0.12462	0.12923	0.10923	0.076923	0.023077	0.038462	0.063077	0.067692	0.058462	0.049231	0.081538	0.076923	0.064615	0.052308	0.10462	0.13077	0.084615	0.06	0.050769	0.050769	0.061538	0.066154	0.058462	0.058462	0.041538	0.049231	0.11538	0.12154	0.10769	0.12923	0.14	0.13846	0.11231	0.10615	0.12
0.061176	0.092941	0.085882	0.055294	0.04	0.037647	0.051765	0.057647	0.057647	0.083529	0.18941	0.19529	0.11529	0.084706	0.058824	0.078824	0.091765	0.088235	0.063529	0.035294	0.035294	0.038824	0.045882	0.042353	0.044706	0.056471	0.065882	0.051765	0.037647	0.092941	0.10706	0.061176	0.044706	0.037647	0.04	0.049412	0.051765	0.044706	0.041176	0.024706	0.043529	0.098824	0.10118	0.096471	0.11412	0.11529	0.10824	0.091765	0.082353	0.084706
0.068571	0.065714	0.045714	0.044286	0.064286	0.075714	0.067143	0.081429	0.16286	0.22714	0.15429	0.068571	0.057143	0.062857	0.10286	0.12571	0.1	0.065714	0.031429	0.031429	0.054286	0.062857	0.067143	0.082857	0.087143	0.08	0.072857	0.058571	0.048571	0.081429	0.10429	0.078571	0.064286	0.052857	0.048571	0.058571	0.058571	0.051429	0.055714	0.045714	0.038571	0.1	0.11714	0.091429	0.11429	0.14	0.14429	0.11429	0.095714	0.10714
0.085714	0.09	0.081429	0.061429	0.044286	0.057143	0.078571	0.074286	0.10714	0.18857	0.19429	0.11429	0.068571	0.067143	0.077143	0.12286	0.13	0.088571	0.051429	0.03	0.042857	0.07	0.068571	0.068571	0.06	0.068571	0.048571	0.095714	0.12143	0.08	0.06	0.06	0.062857	0.067143	0.062857	0.057143	0.042857	0.025714	0.048571	0.10857	0.11857	0.10571	0.12286	0.12857	0.12429	0.10286	0.088571	0.085714	0.1	0.082857
0.073846	0.043077	0.047692	0.063077	0.078462	0.081538	0.098462	0.13692	0.21231	0.17538	0.083077	0.086154	0.086154	0.13846	0.15231	0.10923	0.073846	0.035385	0.036923	0.052308	0.069231	0.069231	0.064615	0.063077	0.055385	0.08	0.06	0.043077	0.063077	0.10308	0.087692	0.067692	0.050769	0.04	0.061538	0.066154	0.061538	0.064615	0.04	0.023077	0.11077	0.14462	0.10615	0.12308	0.14154	0.15231	0.13077	0.10769	0.092308	0.10615
0.1	0.10667	0.10667	0.1	0.1	0.16	0.17333	0.066667	0.033333	0.086667	0.18667	0.16667	0.08	0.093333	0.11333	0.11333	0.066667	0.073333	0.14667	0.14	0.1	0.16	0.16	0.086667	0.12667	0.08	0.11333	0.12	0.1	0.086667	0.073333	0.12667	0.22	0.22667	0.13333	0.093333	0.12667	0.16	0.12667	0.08	0.1	0.12	0.10667	0.10667	0.10667	0.093333	0.13333	0.12	0.093333	0.12
0.12	0.2	0.19	0.11	0.13	0.23	0.23	0.1	0.11	0.18	0.23	0.21	0.14	0.16	0.16	0.21	0.18	0.14	0.21	0.22	0.22	0.22	0.18	0.17	0.21	0.18	0.18	0.19	0.2	0.17	0.16	0.26	0.3	0.24	0.16	0.14	0.2	0.24	0.24	0.19	0.14	0.15	0.17	0.16	0.15	0.13	0.15	0.11	0.13	0.2
0.10667	0.093333	0.11333	0.08	0.086667	0.14	0.14	0.08	0.04	0.11333	0.18	0.12	0.053333	0.06	0.10667	0.14667	0.1	0.086667	0.11333	0.12667	0.12	0.16	0.12	0.066667	0.13333	0.1	0.093333	0.093333	0.10667	0.12	0.1	0.1	0.13333	0.22667	0.26667	0.13333	0.04	0.04	0.08	0.13333	0.10667	0.086667	0.093333	0.06	0.08	0.1	0.093333	0.12	0.12	0.093333
0.12667	0.066667	0.08	0.10667	0.08	0.06	0.1	0.10667	0.046667	0.053333	0.13333	0.16667	0.14667	0.10667	0.08	0.12	0.10667	0.053333	0.04	0.1	0.12667	0.10667	0.14667	0.12	0.1	0.073333	0.08	0.08	0.10667	0.10667	0.06	0.046667	0.08	0.14667	0.18	0.13333	0.066667	0.04	0.053333	0.1	0.12667	0.1	0.073333	0.073333	0.1	0.12	0.12667	0.12667	0.14	0.11333
0.11333	0.093333	0.11333	0.086667	0.066667	0.086667	0.093333	0.06	0.026667	0.053333	0.17333	0.18667	0.10667	0.086667	0.1	0.16	0.12	0.08	0.14	0.14667	0.093333	0.14667	0.16	0.08	0.11333	0.093333	0.08	0.073333	0.093333	0.086667	0.08	0.13333	0.17333	0.18667	0.14667	0.08	0.08	0.093333	0.1	0.10667	0.12	0.12	0.10667	0.11333	0.12	0.1	0.12	0.086667	0.086667	0.14
0.064286	0.058571	0.088571	0.09	0.06	0.03	0.047143	0.084286	0.11143	0.087143	0.042857	0.052857	0.062857	0.054286	0.04	0.034286	0.042857	0.06	0.084286	0.10571	0.12286	0.11429	0.14	0.19143	0.14571	0.045714	0.051429	0.065714	0.057143	0.031429	0.025714	0.028571	0.04	0.044286	0.045714	0.042857	0.065714	0.094286	0.12286	0.13429	0.14857	0.14714	0.11857	0.11286	0.081429	0.095714	0.14286	0.13143	0.10714	0.094286
0.047692	0.043077	0.075385	0.090769	0.070769	0.041538	0.06	0.093846	0.11692	0.1	0.06	0.063077	0.067692	0.058462	0.04	0.038462	0.050769	0.061538	0.092308	0.12462	0.14	0.13077	0.15692	0.18	0.12154	0.050769	0.047692	0.053846	0.038462	0.026154	0.023077	0.032308	0.044615	0.044615	0.046154	0.069231	0.13077	0.16923	0.15385	0.14462	0.14	0.12154	0.10769	0.086154	0.11385	0.15538	0.14154	0.12154	0.10923	0.075385
0.056667	0.061667	0.105	0.11	0.081667	0.041667	0.055	0.095	0.12333	0.098333	0.045	0.06	0.076667	0.07	0.05	0.038333	0.048333	0.068333	0.10667	0.13	0.13333	0.12167	0.15	0.19833	0.145	0.055	0.055	0.06	0.056667	0.041667	0.035	0.033333	0.038333	0.033333	0.046667	0.055	0.10167	0.15667	0.15	0.14667	0.17667	0.165	0.135	0.12167	0.10333	0.14667	0.155	0.11833	0.115	0.083333
0.068333	0.066667	0.071667	0.1	0.10667	0.098333	0.046667	0.033333	0.10333	0.14333	0.093333	0.05	0.05	0.061667	0.071667	0.053333	0.038333	0.045	0.055	0.095	0.13	0.14667	0.13667	0.12167	0.105	0.043333	0.031667	0.035	0.038333	0.021667	0.018333	0.021667	0.023333	0.023333	0.028333	0.035	0.086667	0.13667	0.15333	0.15833	0.17667	0.16833	0.13167	0.11667	0.093333	0.13833	0.165	0.135	0.12333	0.086667
0.056364	0.076364	0.10364	0.10182	0.052727	0.054545	0.12	0.14545	0.096364	0.054545	0.070909	0.069091	0.050909	0.045455	0.043636	0.058182	0.061818	0.10182	0.14182	0.15273	0.14	0.16909	0.21636	0.18727	0.12364	0.050909	0.054545	0.078182	0.069091	0.050909	0.038182	0.050909	0.065455	0.054545	0.047273	0.056364	0.12182	0.17455	0.16727	0.17455	0.18182	0.14727	0.12182	0.11273	0.13273	0.16727	0.15636	0.13091	0.12	0.090909
0.1225	0.1125	0.1275	0.1125	0.1025	0.125	0.095	0.1025	0.0875	0.0875	0.0975	0.1125	0.135	0.1075	0.0525	0.03	0.075	0.155	0.14	0.085	0.115	0.1575	0.18	0.1425	0.075	0.1025	0.1225	0.12	0.0925	0.0875	0.0825	0.06	0.095	0.1275	0.105	0.1175	0.1225	0.105	0.1275	0.115	0.075	0.09	0.1075	0.16	0.1675	0.1125	0.1175	0.1025	0.085	0.09
0.1275	0.12	0.15	0.1225	0.1075	0.125	0.0875	0.1025	0.1075	0.1	0.1025	0.1075	0.11	0.1	0.06	0.0325	0.065	0.1575	0.17	0.1	0.11	0.1525	0.17	0.135	0.075	0.1175	0.125	0.12	0.11	0.1	0.095	0.0725	0.11	0.1375	0.11	0.13	0.1325	0.115	0.1375	0.1175	0.0725	0.09	0.1075	0.15	0.165	0.1125	0.105	0.0975	0.0775	0.085
0.12857	0.21143	0.22	0.18286	0.13143	0.10286	0.13143	0.12857	0.12857	0.12	0.10857	0.12857	0.12571	0.12857	0.11143	0.071429	0.042857	0.074286	0.15429	0.18857	0.14	0.12571	0.14571	0.17429	0.14286	0.17714	0.19143	0.16571	0.14571	0.13143	0.11143	0.097143	0.14286	0.16857	0.13429	0.13429	0.15143	0.16	0.14857	0.10571	0.071429	0.08	0.11429	0.17714	0.17143	0.12	0.12571	0.11143	0.085714	0.1
0.12857	0.16	0.23429	0.18857	0.15143	0.12286	0.12286	0.15143	0.11714	0.11429	0.12286	0.13714	0.13714	0.14	0.13714	0.10571	0.054286	0.048571	0.1	0.17714	0.16	0.10571	0.14	0.14	0.10286	0.14857	0.15429	0.16286	0.14286	0.12857	0.13429	0.097143	0.10571	0.19429	0.19429	0.16286	0.15714	0.12571	0.14286	0.13429	0.10286	0.091429	0.077143	0.094286	0.15429	0.15143	0.12	0.12	0.1	0.091429
0.094286	0.13429	0.17143	0.14286	0.11429	0.14286	0.12857	0.10857	0.11714	0.11143	0.12571	0.12286	0.10857	0.11429	0.091429	0.06	0.071429	0.14857	0.18857	0.11429	0.10286	0.15143	0.18571	0.18286	0.10286	0.13429	0.13714	0.13143	0.12286	0.11143	0.10286	0.094286	0.12	0.15714	0.14286	0.14571	0.15429	0.13143	0.16	0.13429	0.077143	0.097143	0.11143	0.15429	0.16857	0.12286	0.12	0.11143	0.091429	0.088571
0.12667	0.11667	0.096667	0.12667	0.14	0.11	0.096667	0.12333	0.14333	0.09	0.066667	0.13667	0.2	0.25333	0.18667	0.09	0.09	0.10333	0.15333	0.14667	0.1	0.093333	0.15667	0.17333	0.14	0.16	0.10667	0.093333	0.12	0.16667	0.15333	0.073333	0.083333	0.10333	0.08	0.12	0.16	0.16	0.16667	0.15333	0.13	0.11333	0.13333	0.14	0.12333	0.15667	0.15	0.11	0.14333	0.12667
0.11429	0.082857	0.10571	0.15143	0.13714	0.11429	0.10286	0.12	0.094286	0.06	0.082857	0.15143	0.20571	0.18571	0.13143	0.12	0.097143	0.10571	0.12286	0.091429	0.071429	0.097143	0.15143	0.15143	0.14	0.11714	0.14571	0.19143	0.14	0.074286	0.085714	0.14286	0.16	0.085714	0.074286	0.091429	0.062857	0.057143	0.088571	0.13714	0.14571	0.12571	0.11429	0.10286	0.1	0.085714	0.10857	0.16286	0.15143	0.10857
0.15	0.12667	0.12667	0.16667	0.19333	0.15667	0.10667	0.12667	0.13333	0.09	0.093333	0.15333	0.19333	0.23333	0.19	0.10333	0.086667	0.11667	0.14667	0.14	0.11	0.08	0.13	0.14	0.11667	0.16667	0.083333	0.093333	0.13	0.17	0.13667	0.056667	0.09	0.11333	0.086667	0.14333	0.18333	0.16667	0.18	0.17	0.12333	0.11667	0.15333	0.14333	0.13	0.16333	0.16667	0.13667	0.16	0.12333
0.14	0.1	0.073333	0.093333	0.15333	0.16333	0.14333	0.13	0.19	0.15	0.056667	0.073333	0.08	0.17333	0.24667	0.18	0.13333	0.10667	0.12	0.14	0.11	0.08	0.10333	0.16667	0.15333	0.13333	0.18667	0.22	0.11667	0.08	0.13	0.15333	0.14	0.086667	0.10333	0.10333	0.056667	0.06	0.12667	0.20333	0.18667	0.12333	0.11333	0.12667	0.14	0.13667	0.13667	0.17333	0.15	0.093333
0.10667	0.086667	0.11667	0.16667	0.15	0.11333	0.11	0.11667	0.11333	0.08	0.076667	0.17333	0.25333	0.27667	0.19333	0.10667	0.093333	0.10333	0.14	0.12667	0.076667	0.083333	0.14	0.13333	0.14333	0.17667	0.14667	0.083333	0.10333	0.13	0.13667	0.076667	0.056667	0.1	0.096667	0.11	0.16333	0.2	0.18667	0.17	0.14333	0.11	0.12	0.12667	0.12	0.15333	0.15667	0.12	0.15667	0.13
0.061538	0.056923	0.024615	0.015385	0.086154	0.11077	0.083077	0.078462	0.041538	0.035385	0.076923	0.087692	0.076923	0.10154	0.096923	0.056923	0.11538	0.15846	0.075385	0.058462	0.10154	0.092308	0.098462	0.10154	0.053846	0.076923	0.061538	0.06	0.067692	0.087692	0.08	0.070769	0.078462	0.078462	0.073846	0.10769	0.11846	0.086154	0.063077	0.047692	0.049231	0.056923	0.050769	0.027692	0.073846	0.11846	0.10615	0.092308	0.096923	0.086154
0.04	0.022222	0.011111	0.04	0.096667	0.083333	0.052222	0.047778	0.031111	0.042222	0.058889	0.072222	0.084444	0.07	0.046667	0.063333	0.11	0.08	0.037778	0.06	0.066667	0.071111	0.071111	0.051111	0.045556	0.056667	0.048889	0.068889	0.077778	0.053333	0.05	0.064444	0.06	0.045556	0.066667	0.073333	0.045556	0.037778	0.034444	0.034444	0.054444	0.048889	0.02	0.05	0.096667	0.081111	0.054444	0.063333	0.058889	0.051111
0.057143	0.054286	0.03	0.022857	0.091429	0.10429	0.068571	0.074286	0.052857	0.035714	0.068571	0.088571	0.082857	0.1	0.087143	0.047143	0.11143	0.16	0.077143	0.06	0.091429	0.084286	0.088571	0.095714	0.061429	0.061429	0.058571	0.071429	0.087143	0.068571	0.054286	0.074286	0.074286	0.061429	0.092857	0.11143	0.068571	0.04	0.051429	0.054286	0.077143	0.071429	0.025714	0.07	0.12857	0.10857	0.075714	0.08	0.074286	0.074286
0.036	0.005	0.042	0.082	0.074	0.057	0.037	0.021	0.04	0.052	0.072	0.079	0.058	0.042	0.046	0.107	0.089	0.033	0.052	0.066	0.061	0.065	0.053	0.019	0.051	0.052	0.048	0.056	0.071	0.072	0.052	0.047	0.055	0.052	0.046	0.068	0.074	0.054	0.046	0.04	0.04	0.041	0.041	0.03	0.05	0.076	0.072	0.059	0.057	0.062
0.045882	0.0082353	0.06	0.091765	0.063529	0.056471	0.041176	0.030588	0.050588	0.061176	0.083529	0.088235	0.068235	0.048235	0.064706	0.13059	0.091765	0.045882	0.063529	0.057647	0.058824	0.064706	0.047059	0.024706	0.061176	0.049412	0.055294	0.089412	0.084706	0.044706	0.049412	0.064706	0.057647	0.051765	0.076471	0.074118	0.049412	0.044706	0.042353	0.042353	0.054118	0.038824	0.028235	0.074118	0.10353	0.081176	0.065882	0.074118	0.061176	0.058824
0.058667	0.072	0.088	0.078667	0.086667	0.093333	0.061333	0.044	0.068	0.18267	0.22533	0.14533	0.10667	0.16933	0.21333	0.15333	0.092	0.069333	0.073333	0.084	0.11067	0.12133	0.094667	0.093333	0.094667	0.124	0.10267	0.10133	0.089333	0.084	0.066667	0.08	0.11867	0.13867	0.116	0.081333	0.088	0.10667	0.097333	0.1	0.11733	0.12667	0.11333	0.10533	0.12	0.10933	0.112	0.128	0.104	0.088
0.051111	0.06	0.066667	0.072222	0.068889	0.046667	0.033333	0.035556	0.13889	0.21444	0.15	0.12444	0.13778	0.18222	0.15222	0.08	0.062222	0.05	0.054444	0.093333	0.10778	0.075556	0.075556	0.073333	0.066667	0.097778	0.091111	0.091111	0.077778	0.07	0.055556	0.065556	0.092222	0.1	0.087778	0.065556	0.071111	0.088889	0.075556	0.073333	0.093333	0.095556	0.093333	0.10222	0.11111	0.097778	0.10556	0.12111	0.092222	0.072222
0.0525	0.08125	0.08125	0.0825	0.05875	0.0325	0.04125	0.135	0.22375	0.165	0.14	0.19625	0.2075	0.16125	0.09125	0.05625	0.055	0.0625	0.09375	0.11125	0.0875	0.085	0.075	0.04375	0.0725	0.105	0.08875	0.08375	0.08375	0.06875	0.04875	0.08125	0.1025	0.095	0.09	0.08375	0.0825	0.0875	0.08	0.085	0.10375	0.11625	0.11375	0.105	0.11125	0.1	0.10875	0.12375	0.0925	0.085
0.065882	0.072941	0.088235	0.082353	0.08	0.081176	0.065882	0.044706	0.030588	0.092941	0.20588	0.17176	0.089412	0.12118	0.17647	0.16235	0.1	0.062353	0.056471	0.06	0.092941	0.10941	0.084706	0.076471	0.074118	0.11294	0.091765	0.10118	0.094118	0.071765	0.048235	0.070588	0.10471	0.12	0.10118	0.069412	0.077647	0.094118	0.082353	0.081176	0.10353	0.10706	0.088235	0.092941	0.10824	0.096471	0.10588	0.12353	0.096471	0.071765
0.041	0.056	0.067	0.073	0.057	0.021	0.018	0.077	0.205	0.175	0.092	0.142	0.174	0.138	0.085	0.056	0.043	0.047	0.064	0.08	0.081	0.073	0.056	0.04	0.061	0.086	0.088	0.067	0.051	0.043	0.061	0.092	0.093	0.074	0.068	0.063	0.06	0.056	0.068	0.078	0.085	0.085	0.088	0.093	0.08	0.089	0.103	0.081	0.065	0.078
0.08875	0.08375	0.08125	0.07875	0.07	0.06	0.0625	0.06625	0.07125	0.095	0.095	0.05625	0.0275	0.02625	0.025	0.09375	0.185	0.16125	0.1325	0.20875	0.19875	0.13125	0.105	0.06625	0.04375	0.1075	0.105	0.08	0.10625	0.11125	0.0775	0.065	0.075	0.095	0.1125	0.1075	0.085	0.0725	0.08625	0.07625	0.06875	0.12375	0.1425	0.0925	0.0675	0.0925	0.1175	0.11125	0.09625	0.07375
0.08	0.075294	0.074118	0.070588	0.062353	0.056471	0.06	0.062353	0.064706	0.084706	0.087059	0.051765	0.023529	0.025882	0.027059	0.096471	0.18353	0.15647	0.13294	0.20235	0.18941	0.12353	0.090588	0.064706	0.050588	0.090588	0.081176	0.069412	0.092941	0.096471	0.070588	0.061176	0.072941	0.097647	0.11765	0.10588	0.082353	0.072941	0.082353	0.065882	0.068235	0.12588	0.13529	0.085882	0.068235	0.098824	0.11412	0.1	0.092941	0.08
0.075294	0.085882	0.072941	0.051765	0.058824	0.065882	0.076471	0.083529	0.077647	0.062353	0.031765	0.025882	0.028235	0.078824	0.18118	0.16941	0.11176	0.18471	0.19647	0.12588	0.085882	0.069412	0.075294	0.092941	0.084706	0.10353	0.092941	0.094118	0.10588	0.092941	0.067059	0.050588	0.078824	0.11647	0.11647	0.085882	0.085882	0.098824	0.088235	0.063529	0.092941	0.12353	0.098824	0.074118	0.082353	0.11294	0.10941	0.097647	0.091765	0.077647
0.097647	0.089412	0.074118	0.078824	0.074118	0.057647	0.063529	0.064706	0.072941	0.085882	0.087059	0.070588	0.042353	0.035294	0.025882	0.075294	0.18471	0.17412	0.11059	0.18118	0.2	0.12824	0.082353	0.064706	0.056471	0.088235	0.062353	0.092941	0.10824	0.076471	0.064706	0.082353	0.1	0.11647	0.11765	0.087059	0.087059	0.10353	0.077647	0.062353	0.12235	0.14353	0.091765	0.067059	0.088235	0.11294	0.10588	0.090588	0.076471	0.078824
0.10375	0.1	0.0725	0.0725	0.07625	0.055	0.05375	0.0575	0.0675	0.07625	0.08875	0.07875	0.0475	0.03875	0.02875	0.06125	0.16375	0.1825	0.1275	0.18625	0.2125	0.15375	0.11	0.07125	0.0475	0.10375	0.0875	0.0825	0.1025	0.095	0.075	0.07	0.0875	0.10625	0.1175	0.10625	0.08625	0.08	0.085	0.06875	0.08625	0.13625	0.12625	0.08375	0.07125	0.1075	0.125	0.10625	0.09125	0.07
0.041818	0.032727	0.064545	0.063636	0.032727	0.038182	0.058182	0.06	0.047273	0.028182	0.023636	0.041818	0.052727	0.11909	0.14909	0.21273	0.23636	0.093636	0.026364	0.029091	0.041818	0.051818	0.067273	0.088182	0.068182	0.070909	0.055455	0.051818	0.065455	0.096364	0.087273	0.054545	0.051818	0.055455	0.056364	0.088182	0.085455	0.056364	0.063636	0.069091	0.065455	0.078182	0.086364	0.072727	0.058182	0.050909	0.051818	0.076364	0.10727	0.090909
0.063	0.068	0.059	0.04	0.05	0.06	0.051	0.046	0.035	0.026	0.031	0.098	0.16	0.166	0.233	0.293	0.17	0.031	0.022	0.041	0.048	0.076	0.099	0.065	0.057	0.09	0.058	0.085	0.109	0.097	0.067	0.051	0.055	0.069	0.091	0.069	0.055	0.07	0.069	0.072	0.102	0.103	0.085	0.075	0.055	0.061	0.091	0.107	0.088	0.084
0.05	0.07	0.063	0.033	0.043	0.057	0.051	0.044	0.028	0.026	0.062	0.13	0.17	0.16	0.23	0.25	0.1	0.018	0.032	0.049	0.059	0.074	0.081	0.054	0.055	0.079	0.062	0.058	0.067	0.1	0.099	0.065	0.056	0.06	0.067	0.091	0.078	0.048	0.057	0.071	0.067	0.077	0.096	0.089	0.076	0.064	0.055	0.078	0.105	0.083
0.045455	0.034545	0.057273	0.055455	0.026364	0.029091	0.057273	0.060909	0.040909	0.026364	0.021818	0.053636	0.08	0.12727	0.14818	0.20545	0.22636	0.092727	0.024545	0.03	0.037273	0.042727	0.061818	0.088182	0.064545	0.084545	0.061818	0.05	0.043636	0.067273	0.092727	0.079091	0.053636	0.051818	0.059091	0.062727	0.086364	0.10182	0.076364	0.060909	0.065455	0.062727	0.078182	0.079091	0.072727	0.063636	0.047273	0.050909	0.077273	0.088182
0.055	0.062	0.059	0.035	0.049	0.064	0.054	0.044	0.031	0.023	0.041	0.109	0.158	0.154	0.234	0.27	0.126	0.019	0.02	0.045	0.053	0.08	0.095	0.06	0.059	0.072	0.045	0.074	0.101	0.086	0.062	0.051	0.052	0.067	0.096	0.081	0.061	0.07	0.071	0.068	0.091	0.098	0.084	0.076	0.062	0.062	0.088	0.102	0.08	0.083
0.057273	0.040909	0.032727	0.04	0.10727	0.16091	0.22455	0.28182	0.18545	0.053636	0.0072727	0.019091	0.030909	0.043636	0.052727	0.07	0.069091	0.045455	0.047273	0.05	0.055455	0.057273	0.056364	0.046364	0.036364	0.073636	0.078182	0.096364	0.086364	0.055455	0.066364	0.081818	0.065455	0.083636	0.091818	0.071818	0.068182	0.063636	0.062727	0.080909	0.092727	0.075455	0.062727	0.054545	0.051818	0.086364	0.10364	0.084545	0.077273	0.070909
0.044762	0.02381	0.034286	0.089524	0.17238	0.20952	0.28476	0.22476	0.051429	0.013333	0.025714	0.038095	0.038095	0.059048	0.082857	0.067619	0.045714	0.047619	0.050476	0.050476	0.05619	0.065714	0.062857	0.045714	0.047619	0.077143	0.046667	0.071429	0.091429	0.086667	0.061905	0.075238	0.089524	0.070476	0.088571	0.097143	0.073333	0.066667	0.06	0.066667	0.098095	0.09619	0.081905	0.077143	0.050476	0.050476	0.099048	0.10476	0.08	0.071429
0.04	0.025833	0.020833	0.039167	0.12333	0.1575	0.22583	0.245	0.091667	0.013333	0.013333	0.031667	0.04	0.041667	0.053333	0.065	0.048333	0.04	0.040833	0.036667	0.039167	0.044167	0.0475	0.039167	0.034167	0.055833	0.04	0.045	0.063333	0.0725	0.060833	0.055833	0.07	0.065	0.0625	0.081667	0.0725	0.05	0.055833	0.053333	0.063333	0.0875	0.08	0.064167	0.054167	0.046667	0.063333	0.0825	0.0725	0.063333
0.049091	0.025455	0.028182	0.060909	0.13909	0.16455	0.26455	0.27091	0.092727	0.018182	0.014545	0.037273	0.050909	0.05	0.056364	0.069091	0.057273	0.05	0.052727	0.051818	0.054545	0.057273	0.06	0.039091	0.036364	0.063636	0.069091	0.093636	0.092727	0.06	0.06	0.080909	0.069091	0.071818	0.089091	0.075455	0.059091	0.054545	0.059091	0.083636	0.1	0.081818	0.064545	0.050909	0.044545	0.076364	0.095455	0.085455	0.087273	0.08
0.0336	0.0232	0.0248	0.0456	0.1192	0.1424	0.216	0.2424	0.0992	0.0232	0.0144	0.0336	0.0464	0.0384	0.048	0.068	0.0512	0.0416	0.0432	0.0368	0.0376	0.0424	0.0552	0.0464	0.0352	0.0616	0.0416	0.0624	0.0768	0.0656	0.0464	0.064	0.072	0.0544	0.0728	0.0712	0.0576	0.064	0.0544	0.056	0.084	0.08	0.0656	0.0624	0.0432	0.0512	0.0832	0.076	0.0664	0.064
0.04087	0.032174	0.036522	0.032174	0.032174	0.050435	0.12	0.14435	0.23217	0.25565	0.10174	0.025217	0.0069565	0.018261	0.04087	0.046957	0.055652	0.072174	0.056522	0.048696	0.052174	0.047826	0.049565	0.054783	0.05913	0.057391	0.066957	0.093913	0.090435	0.05913	0.056522	0.066957	0.056522	0.063478	0.083478	0.074783	0.061739	0.05913	0.052174	0.073043	0.1	0.082609	0.065217	0.057391	0.048696	0.065217	0.088696	0.085217	0.081739	0.072174
0.045833	0.031667	0.025	0.04	0.11583	0.15667	0.22583	0.26167	0.12333	0.025833	0.013333	0.029167	0.038333	0.04	0.054167	0.070833	0.053333	0.039167	0.045	0.043333	0.045	0.0475	0.053333	0.055	0.040833	0.0675	0.045833	0.060833	0.08	0.075833	0.050833	0.065	0.079167	0.06	0.075833	0.0825	0.071667	0.073333	0.060833	0.0525	0.078333	0.085	0.073333	0.068333	0.048333	0.0475	0.086667	0.095	0.075	0.063333
0.050909	0.043636	0.032727	0.020909	0.026364	0.057273	0.13545	0.16	0.25182	0.24909	0.074545	0.017273	0.0072727	0.017273	0.031818	0.042727	0.063636	0.070909	0.049091	0.049091	0.05	0.04	0.044545	0.047273	0.053636	0.057273	0.037273	0.060909	0.089091	0.085455	0.055455	0.070909	0.076364	0.052727	0.073636	0.084545	0.07	0.065455	0.054545	0.049091	0.083636	0.093636	0.08	0.073636	0.050909	0.05	0.08	0.086364	0.075455	0.070909
0.043333	0.035	0.030833	0.020833	0.019167	0.046667	0.12333	0.14917	0.23417	0.235	0.0725	0.016667	0.01	0.0175	0.033333	0.045	0.063333	0.0675	0.043333	0.045	0.0525	0.044167	0.0425	0.045	0.0525	0.058333	0.040833	0.063333	0.08	0.069167	0.05	0.066667	0.066667	0.049167	0.0725	0.0775	0.065833	0.068333	0.054167	0.048333	0.084167	0.09	0.074167	0.0675	0.045	0.044167	0.076667	0.079167	0.069167	0.068333
0.047619	0.04381	0.04	0.029524	0.032381	0.071429	0.15143	0.1781	0.26857	0.24952	0.069524	0.014286	0.0095238	0.019048	0.039048	0.05619	0.071429	0.072381	0.049524	0.044762	0.052381	0.050476	0.050476	0.053333	0.054286	0.054286	0.049524	0.091429	0.10095	0.073333	0.060952	0.080952	0.075238	0.061905	0.087619	0.078095	0.06	0.068571	0.06	0.073333	0.10476	0.089524	0.073333	0.068571	0.052381	0.06381	0.094286	0.087619	0.078095	0.074286
0.051304	0.050435	0.047826	0.030435	0.029565	0.029565	0.04	0.067826	0.11565	0.17043	0.14348	0.061739	0.022609	0.028696	0.057391	0.1313	0.13826	0.061739	0.029565	0.035652	0.052174	0.049565	0.034783	0.046957	0.037391	0.058261	0.066087	0.066957	0.062609	0.06	0.06	0.068696	0.068696	0.052174	0.04	0.03913	0.048696	0.053913	0.055652	0.066087	0.090435	0.087826	0.066087	0.070435	0.07913	0.073913	0.062609	0.06	0.054783	0.058261
0.05	0.047	0.058	0.055	0.047	0.04	0.025	0.033	0.081	0.142	0.21	0.162	0.078	0.049	0.032	0.08	0.146	0.165	0.096	0.031	0.04	0.066	0.059	0.039	0.037	0.074	0.083	0.075	0.063	0.064	0.081	0.091	0.077	0.05	0.052	0.071	0.07	0.064	0.078	0.093	0.075	0.061	0.076	0.08	0.069	0.062	0.072	0.078	0.085	0.089
0.062	0.047	0.044	0.045	0.048	0.034	0.029	0.067	0.154	0.214	0.149	0.057	0.026	0.035	0.078	0.165	0.161	0.07	0.03	0.04	0.061	0.059	0.05	0.056	0.041	0.068	0.073	0.074	0.065	0.065	0.082	0.091	0.076	0.052	0.05	0.068	0.067	0.056	0.076	0.101	0.088	0.068	0.079	0.091	0.086	0.072	0.074	0.07	0.063	0.072
0.061111	0.041111	0.054444	0.058889	0.05	0.045556	0.043333	0.03	0.041111	0.076667	0.18889	0.22444	0.16222	0.12111	0.06	0.054444	0.10556	0.18333	0.15778	0.062222	0.033333	0.051111	0.073333	0.057778	0.044444	0.075556	0.078889	0.081111	0.064444	0.06	0.084444	0.094444	0.081111	0.057778	0.054444	0.073333	0.077778	0.073333	0.088889	0.11222	0.091111	0.065556	0.082222	0.092222	0.084444	0.076667	0.086667	0.087778	0.078889	0.081111
0.051818	0.04	0.05	0.046364	0.040909	0.036364	0.041818	0.069091	0.11	0.18545	0.17455	0.075455	0.032727	0.031818	0.050909	0.12636	0.14364	0.070909	0.033636	0.033636	0.048182	0.051818	0.035455	0.047273	0.043636	0.068182	0.059091	0.067273	0.07	0.070909	0.066364	0.063636	0.073636	0.061818	0.05	0.049091	0.056364	0.063636	0.06	0.062727	0.081818	0.087273	0.063636	0.059091	0.079091	0.080909	0.068182	0.066364	0.07	0.071818
0.03913	0.036522	0.050435	0.042609	0.031304	0.031304	0.02	0.023478	0.04087	0.032174	0.026957	0.029565	0.02087	0.042609	0.068696	0.095652	0.15304	0.14609	0.066957	0.038261	0.057391	0.12609	0.14087	0.058261	0.030435	0.049565	0.066087	0.05913	0.050435	0.062609	0.069565	0.058261	0.050435	0.061739	0.06	0.042609	0.04087	0.045217	0.054783	0.054783	0.053913	0.070435	0.076522	0.066087	0.058261	0.068696	0.069565	0.057391	0.06087	0.062609
0.043	0.052	0.049	0.034	0.035	0.036	0.042	0.047	0.043	0.04	0.033	0.039	0.05	0.071	0.095	0.186	0.186	0.062	0.039	0.065	0.122	0.165	0.105	0.038	0.038	0.055	0.048	0.056	0.075	0.079	0.068	0.063	0.075	0.078	0.062	0.046	0.056	0.07	0.069	0.067	0.078	0.09	0.073	0.06	0.083	0.088	0.064	0.071	0.08	0.067
0.046667	0.057778	0.052222	0.038889	0.043333	0.04	0.043333	0.053333	0.047778	0.044444	0.035556	0.044444	0.064444	0.086667	0.11889	0.20778	0.19222	0.063333	0.038889	0.072222	0.14	0.17333	0.10333	0.036667	0.041111	0.065556	0.056667	0.062222	0.081111	0.094444	0.08	0.057778	0.07	0.08	0.071111	0.058889	0.064444	0.075556	0.074444	0.072222	0.085556	0.096667	0.078889	0.061111	0.076667	0.087778	0.072222	0.075556	0.093333	0.085556
0.04381	0.041905	0.044762	0.038095	0.026667	0.021905	0.02381	0.034286	0.041905	0.035238	0.027619	0.032381	0.03619	0.053333	0.082857	0.13619	0.16857	0.12	0.057143	0.042857	0.080952	0.15524	0.12762	0.037143	0.031429	0.051429	0.044762	0.058095	0.055238	0.06	0.074286	0.068571	0.055238	0.059048	0.071429	0.061905	0.040952	0.032381	0.042857	0.054286	0.051429	0.059048	0.082857	0.079048	0.067619	0.073333	0.078095	0.070476	0.057143	0.06381
0.035455	0.031818	0.044545	0.042727	0.030909	0.028182	0.023636	0.03	0.043636	0.034545	0.036364	0.035455	0.02	0.038182	0.066364	0.1	0.16091	0.15182	0.067273	0.035455	0.06	0.13273	0.14636	0.063636	0.032727	0.04	0.051818	0.053636	0.059091	0.076364	0.073636	0.056364	0.057273	0.07	0.063636	0.040909	0.04	0.047273	0.050909	0.056364	0.066364	0.08	0.073636	0.057273	0.063636	0.073636	0.067273	0.061818	0.069091	0.068182
0.055556	0.041111	0.037778	0.05	0.094444	0.15222	0.25222	0.22	0.07	0.031111	0.075556	0.14444	0.18	0.15556	0.084444	0.035556	0.046667	0.076667	0.064444	0.042222	0.061111	0.053333	0.05	0.066667	0.052222	0.07	0.077778	0.096667	0.077778	0.063333	0.07	0.09	0.097778	0.075556	0.063333	0.072222	0.085556	0.088889	0.092222	0.096667	0.11333	0.10444	0.075556	0.082222	0.093333	0.08	0.063333	0.073333	0.08	0.085556
0.031111	0.04	0.043333	0.05	0.095556	0.12889	0.24111	0.24	0.087778	0.038889	0.06	0.13	0.17556	0.16556	0.09	0.025556	0.037778	0.058889	0.061111	0.052222	0.065556	0.06	0.047778	0.061111	0.051111	0.062222	0.07	0.085556	0.096667	0.077778	0.06	0.068889	0.088889	0.09	0.071111	0.061111	0.066667	0.071111	0.078889	0.09	0.097778	0.10778	0.096667	0.08	0.093333	0.1	0.084444	0.07	0.068889	0.071111
0.051111	0.047778	0.046667	0.064444	0.10889	0.15333	0.23111	0.19778	0.066667	0.036667	0.087778	0.15333	0.17778	0.13889	0.061111	0.027778	0.042222	0.068889	0.063333	0.048889	0.068889	0.056667	0.051111	0.057778	0.037778	0.061111	0.08	0.082222	0.092222	0.09	0.064444	0.068889	0.083333	0.096667	0.088889	0.068889	0.065556	0.064444	0.075556	0.088889	0.094444	0.10333	0.10222	0.084444	0.076667	0.09	0.093333	0.067778	0.061111	0.071111
0.039	0.036	0.035	0.04	0.07	0.096	0.202	0.227	0.114	0.053	0.042	0.09	0.126	0.159	0.117	0.033	0.031	0.051	0.056	0.046	0.05	0.059	0.053	0.05	0.045	0.052	0.065	0.07	0.085	0.089	0.066	0.062	0.071	0.083	0.077	0.059	0.056	0.054	0.066	0.077	0.085	0.094	0.091	0.08	0.078	0.088	0.085	0.067	0.065	0.069
0.043529	0.034118	0.042353	0.06	0.10824	0.15059	0.25529	0.23765	0.083529	0.036471	0.075294	0.14588	0.17882	0.16118	0.087059	0.030588	0.041176	0.067059	0.065882	0.054118	0.070588	0.056471	0.048235	0.057647	0.038824	0.067059	0.067059	0.084706	0.1	0.083529	0.069412	0.078824	0.098824	0.10118	0.075294	0.056471	0.067059	0.08	0.084706	0.090588	0.10471	0.11765	0.091765	0.071765	0.096471	0.10235	0.083529	0.071765	0.08	0.083529
0.070667	0.04	0.054667	0.074667	0.070667	0.052	0.017333	0.042667	0.14267	0.11467	0.156	0.384	0.48533	0.404	0.19867	0.06	0.050667	0.084	0.108	0.084	0.054667	0.049333	0.074667	0.081333	0.058667	0.089333	0.12267	0.14667	0.10267	0.08	0.116	0.12133	0.093333	0.085333	0.1	0.11867	0.11333	0.10667	0.11333	0.11733	0.096	0.078667	0.084	0.1	0.112	0.11067	0.10667	0.10667	0.10533	0.092
0.0675	0.035	0.0425	0.05875	0.06	0.06625	0.03625	0.02125	0.1	0.11	0.09125	0.30125	0.475	0.42	0.2275	0.06625	0.045	0.07625	0.1125	0.10875	0.0675	0.04875	0.0675	0.0775	0.0725	0.11625	0.12875	0.09125	0.06375	0.10375	0.1275	0.1025	0.08	0.08625	0.1075	0.1175	0.1075	0.0925	0.0975	0.0875	0.075	0.07875	0.095	0.0975	0.09875	0.1025	0.0975	0.10625	0.10375	0.09125
0.066667	0.086667	0.093333	0.081333	0.04	0.016	0.073333	0.16667	0.11067	0.156	0.43467	0.39733	0.216	0.148	0.06	0.048	0.073333	0.10267	0.084	0.049333	0.053333	0.085333	0.078667	0.04	0.062667	0.094667	0.112	0.14267	0.10133	0.074667	0.11733	0.13333	0.094667	0.076	0.097333	0.124	0.116	0.104	0.11867	0.132	0.11067	0.081333	0.076	0.10133	0.12267	0.112	0.104	0.112	0.12133	0.10267
0.061333	0.086667	0.089333	0.077333	0.038667	0.013333	0.078667	0.18533	0.12933	0.14267	0.41333	0.41333	0.25333	0.17067	0.066667	0.049333	0.076	0.10933	0.082667	0.044	0.049333	0.086667	0.082667	0.045333	0.065333	0.10667	0.085333	0.112	0.144	0.097333	0.073333	0.12533	0.14133	0.097333	0.08	0.104	0.12267	0.12	0.116	0.12267	0.13733	0.11467	0.074667	0.074667	0.11467	0.124	0.11733	0.112	0.108	0.10933
0.065333	0.056	0.088	0.093333	0.068	0.04	0.025333	0.086667	0.14933	0.085333	0.22267	0.41067	0.39733	0.328	0.15733	0.052	0.061333	0.11067	0.12533	0.078667	0.052	0.069333	0.086667	0.064	0.066667	0.094667	0.092	0.144	0.152	0.097333	0.092	0.12667	0.12	0.085333	0.090667	0.116	0.12	0.11467	0.11067	0.11067	0.11733	0.097333	0.077333	0.093333	0.11467	0.11067	0.12	0.124	0.11467	0.10933
0.032632	0.043158	0.071579	0.073684	0.041053	0.050526	0.097895	0.068421	0.19368	0.35684	0.23895	0.071579	0.012632	0.018947	0.043158	0.090526	0.088421	0.043158	0.031579	0.048421	0.066316	0.06	0.047368	0.048421	0.049474	0.08	0.068421	0.074737	0.095789	0.094737	0.074737	0.055789	0.061053	0.090526	0.087368	0.067368	0.065263	0.061053	0.072632	0.086316	0.089474	0.093684	0.084211	0.068421	0.10211	0.11579	0.090526	0.084211	0.067368	0.066316
0.035294	0.047059	0.085882	0.095294	0.051765	0.041176	0.11059	0.089412	0.16235	0.36118	0.32471	0.12353	0.018824	0.021176	0.030588	0.084706	0.1	0.057647	0.044706	0.055294	0.087059	0.088235	0.062353	0.052941	0.056471	0.097647	0.098824	0.088235	0.098824	0.10824	0.098824	0.076471	0.062353	0.097647	0.12118	0.096471	0.08	0.075294	0.085882	0.096471	0.095294	0.091765	0.089412	0.076471	0.083529	0.11882	0.12235	0.10471	0.089412	0.070588
0.058947	0.024211	0.029474	0.045263	0.071579	0.064211	0.025263	0.051579	0.082105	0.061053	0.23474	0.35684	0.29263	0.19474	0.058947	0.028421	0.054737	0.10105	0.093684	0.044211	0.044211	0.069474	0.073684	0.052632	0.046316	0.091579	0.083158	0.081053	0.088421	0.087368	0.068421	0.068421	0.088421	0.093684	0.083158	0.073684	0.069474	0.069474	0.075789	0.082105	0.086316	0.081053	0.063158	0.074737	0.10632	0.098947	0.086316	0.086316	0.070526	0.066316
0.043529	0.077647	0.088235	0.054118	0.035294	0.089412	0.088235	0.12706	0.38118	0.38588	0.11765	0.021176	0.025882	0.035294	0.063529	0.11176	0.094118	0.035294	0.044706	0.091765	0.095294	0.064706	0.045882	0.057647	0.070588	0.089412	0.092941	0.091765	0.097647	0.11059	0.10588	0.088235	0.070588	0.075294	0.10235	0.10706	0.092941	0.091765	0.087059	0.090588	0.1	0.095294	0.10118	0.097647	0.075294	0.098824	0.12353	0.11059	0.10353	0.08
0.065	0.0375	0.06125	0.08125	0.0775	0.04625	0.04625	0.1	0.07	0.15375	0.41875	0.34375	0.1425	0.075	0.01625	0.05	0.09125	0.1025	0.0675	0.0425	0.06625	0.10125	0.08875	0.05875	0.075	0.11	0.10125	0.10375	0.1125	0.11375	0.09125	0.065	0.07875	0.115	0.105	0.08625	0.08875	0.0825	0.095	0.10375	0.10875	0.115	0.08625	0.0725	0.1175	0.12625	0.0975	0.09	0.07375	0.0725
0.062222	0.061111	0.032222	0.051111	0.12667	0.088889	0.20556	0.4	0.27222	0.082222	0.023333	0.03	0.037778	0.062222	0.073333	0.046667	0.027778	0.04	0.075556	0.076667	0.047778	0.045556	0.063333	0.058889	0.046667	0.08	0.08	0.083333	0.08	0.083333	0.11	0.11667	0.093333	0.062222	0.053333	0.084444	0.093333	0.077778	0.078889	0.075556	0.08	0.087778	0.094444	0.1	0.095556	0.075556	0.088889	0.11889	0.098889	0.068889
0.058889	0.043333	0.022222	0.09	0.13667	0.10222	0.30333	0.40333	0.18111	0.052222	0.02	0.034444	0.051111	0.075556	0.076667	0.04	0.028889	0.055556	0.076667	0.068889	0.053333	0.061111	0.074444	0.061111	0.043333	0.087778	0.067778	0.082222	0.084444	0.088889	0.10667	0.11667	0.11333	0.084444	0.057778	0.076667	0.098889	0.097778	0.09	0.086667	0.084444	0.084444	0.096667	0.092222	0.092222	0.084444	0.074444	0.10222	0.10444	0.065556
0.073333	0.06	0.028889	0.061111	0.13111	0.092222	0.23778	0.40778	0.24778	0.074444	0.022222	0.034444	0.048889	0.074444	0.08	0.047778	0.032222	0.043333	0.065556	0.065556	0.048889	0.05	0.065556	0.058889	0.046667	0.092222	0.087778	0.095556	0.083333	0.077778	0.10556	0.11667	0.10111	0.068889	0.052222	0.086667	0.1	0.082222	0.08	0.076667	0.082222	0.093333	0.094444	0.094444	0.092222	0.075556	0.083333	0.11222	0.10556	0.073333
0.063333	0.061111	0.031111	0.046667	0.12889	0.094444	0.21222	0.39778	0.27222	0.09	0.022222	0.026667	0.037778	0.062222	0.073333	0.045556	0.03	0.046667	0.075556	0.074444	0.05	0.048889	0.066667	0.063333	0.048889	0.088889	0.086667	0.095556	0.085556	0.078889	0.11	0.12333	0.10222	0.067778	0.051111	0.085556	0.10333	0.088889	0.082222	0.075556	0.086667	0.092222	0.087778	0.091111	0.092222	0.075556	0.081111	0.10778	0.094444	0.066667
0.07	0.075	0.041	0.049	0.109	0.076	0.191	0.354	0.231	0.061	0.015	0.034	0.044	0.071	0.08	0.043	0.027	0.048	0.066	0.056	0.04	0.043	0.063	0.06	0.04	0.091	0.088	0.074	0.083	0.105	0.103	0.079	0.054	0.058	0.084	0.084	0.067	0.066	0.063	0.068	0.083	0.081	0.089	0.093	0.063	0.074	0.101	0.088	0.084	0.067
0.075	0.04875	0.04875	0.0475	0.0325	0.045	0.08125	0.08625	0.055	0.02	0.04125	0.08375	0.09	0.04875	0.18625	0.445	0.33375	0.0975	0.04125	0.055	0.1075	0.1325	0.08375	0.02875	0.0375	0.115	0.07875	0.07	0.0875	0.10375	0.10875	0.11125	0.10875	0.09625	0.0775	0.06625	0.07625	0.09	0.105	0.10625	0.08125	0.0825	0.1075	0.10625	0.1	0.095	0.06875	0.0825	0.11	0.08875
0.094286	0.05	0.054286	0.065714	0.038571	0.032857	0.077143	0.091429	0.058571	0.021429	0.037143	0.10143	0.12857	0.064286	0.14571	0.49571	0.45429	0.15286	0.067143	0.044286	0.087143	0.14429	0.12286	0.061429	0.052857	0.092857	0.10571	0.13	0.11	0.082857	0.094286	0.11857	0.12571	0.12714	0.13714	0.12571	0.095714	0.085714	0.072857	0.08	0.11571	0.11857	0.10571	0.10714	0.12571	0.12571	0.11	0.10286	0.082857	0.1
0.057647	0.056471	0.037647	0.021176	0.036471	0.061176	0.08	0.06	0.017647	0.038824	0.081176	0.047059	0	0.20706	0.39765	0.28471	0.11882	0.037647	0.047059	0.10353	0.12588	0.084706	0.042353	0.031765	0.050588	0.10588	0.096471	0.070588	0.070588	0.088235	0.094118	0.092941	0.10118	0.098824	0.072941	0.062353	0.068235	0.072941	0.090588	0.096471	0.082353	0.082353	0.097647	0.10118	0.091765	0.081176	0.068235	0.078824	0.10471	0.097647
0.06	0.048235	0.043529	0.023529	0.028235	0.063529	0.087059	0.068235	0.022353	0.02	0.087059	0.068235	0.0023529	0.12588	0.35059	0.34588	0.15176	0.041176	0.032941	0.082353	0.12235	0.098824	0.049412	0.031765	0.054118	0.090588	0.098824	0.081176	0.070588	0.083529	0.090588	0.096471	0.1	0.10353	0.091765	0.067059	0.063529	0.063529	0.076471	0.092941	0.097647	0.083529	0.082353	0.097647	0.098824	0.096471	0.078824	0.06	0.087059	0.10588
0.06	0.065556	0.054444	0.046667	0.034444	0.021111	0.034444	0.054444	0.067778	0.044444	0.011111	0.036667	0.062222	0.06	0.035556	0.21444	0.37333	0.24556	0.10222	0.035556	0.05	0.11	0.12111	0.064444	0.031111	0.10222	0.077778	0.057778	0.077778	0.086667	0.078889	0.084444	0.096667	0.09	0.064444	0.05	0.058889	0.071111	0.082222	0.085556	0.072222	0.073333	0.088889	0.086667	0.084444	0.09	0.077778	0.08	0.093333	0.084444
0.05625	0.05	0.04375	0.0575	0.085	0.075	0.07625	0.07375	0.02875	0.01875	0.04875	0.07375	0.08	0.07	0.03625	0.01625	0.045	0.03625	0.16375	0.41625	0.31625	0.07125	0.03375	0.05875	0.0525	0.0975	0.095	0.085	0.07625	0.06875	0.06125	0.07625	0.07625	0.06375	0.08375	0.1025	0.10125	0.1	0.1075	0.1	0.0775	0.08625	0.10875	0.10125	0.08375	0.07125	0.0675	0.06	0.0525	0.06375
0.053333	0.038889	0.061111	0.058889	0.065556	0.077778	0.036667	0.013333	0.03	0.057778	0.07	0.043333	0.017778	0.014444	0.032222	0.035556	0.07	0.29	0.33889	0.13	0.036667	0.048889	0.097778	0.13667	0.078889	0.091111	0.08	0.07	0.055556	0.053333	0.062222	0.085556	0.083333	0.057778	0.066667	0.091111	0.091111	0.084444	0.09	0.084444	0.067778	0.077778	0.1	0.10444	0.1	0.085556	0.067778	0.066667	0.07	0.07
0.048	0.078667	0.097333	0.076	0.074667	0.072	0.036	0.024	0.04	0.068	0.066667	0.029333	0.008	0.017333	0.048	0.050667	0.20667	0.42267	0.27733	0.053333	0.044	0.108	0.14667	0.116	0.057333	0.11867	0.084	0.078667	0.08	0.090667	0.11067	0.098667	0.073333	0.090667	0.108	0.104	0.11467	0.12267	0.11067	0.085333	0.096	0.116	0.11333	0.1	0.068	0.057333	0.066667	0.073333	0.077333	0.072
0.06	0.048235	0.044706	0.058824	0.076471	0.067059	0.071765	0.068235	0.031765	0.021176	0.04	0.062353	0.070588	0.06	0.027059	0.0058824	0.034118	0.035294	0.15529	0.37059	0.27176	0.06	0.029412	0.061176	0.057647	0.095294	0.077647	0.063529	0.062353	0.064706	0.072941	0.070588	0.058824	0.067059	0.084706	0.088235	0.091765	0.096471	0.092941	0.074118	0.076471	0.097647	0.095294	0.081176	0.064706	0.055294	0.056471	0.058824	0.071765	0.070588
0.047059	0.056471	0.067059	0.058824	0.068235	0.076471	0.037647	0.017647	0.034118	0.056471	0.063529	0.034118	0.0094118	0.010588	0.035294	0.035294	0.13765	0.34824	0.27647	0.074118	0.035294	0.081176	0.12824	0.11294	0.057647	0.087059	0.069412	0.063529	0.068235	0.085882	0.090588	0.070588	0.065882	0.088235	0.090588	0.085882	0.092941	0.094118	0.085882	0.081176	0.095294	0.10235	0.1	0.081176	0.061176	0.068235	0.069412	0.071765	0.077647	0.06
0.047778	0.025556	0.026667	0.055556	0.10556	0.093333	0.04	0.027778	0.064444	0.10778	0.15	0.14111	0.097778	0.18333	0.28111	0.17667	0.055556	0.053333	0.042222	0.033333	0.048889	0.045556	0.05	0.058889	0.046667	0.082222	0.095556	0.098889	0.073333	0.073333	0.093333	0.088889	0.073333	0.076667	0.093333	0.095556	0.086667	0.084444	0.087778	0.065556	0.052222	0.075556	0.068889	0.075556	0.096667	0.085556	0.067778	0.063333	0.083333	0.084444
0.036	0.025	0.033	0.065	0.09	0.07	0.038	0.03	0.052	0.087	0.117	0.104	0.076	0.228	0.277	0.105	0.05	0.055	0.037	0.037	0.043	0.05	0.068	0.055	0.039	0.095	0.075	0.071	0.079	0.088	0.072	0.064	0.078	0.086	0.087	0.088	0.069	0.042	0.044	0.064	0.066	0.059	0.072	0.075	0.07	0.06	0.069	0.085	0.08	0.062
0.052632	0.031579	0.025263	0.045263	0.087368	0.083158	0.041053	0.032632	0.044211	0.074737	0.12737	0.13158	0.10105	0.13895	0.26316	0.23158	0.070526	0.045263	0.051579	0.031579	0.041053	0.052632	0.052632	0.057895	0.053684	0.10105	0.089474	0.067368	0.073684	0.096842	0.077895	0.068421	0.086316	0.092632	0.089474	0.084211	0.083158	0.075789	0.061053	0.063158	0.070526	0.06	0.066316	0.074737	0.074737	0.064211	0.064211	0.088421	0.091579	0.062105
0.038947	0.023158	0.028421	0.055789	0.10211	0.087368	0.035789	0.024211	0.045263	0.08	0.13053	0.13368	0.10105	0.17895	0.27158	0.18211	0.067368	0.050526	0.038947	0.036842	0.050526	0.047368	0.046316	0.052632	0.046316	0.094737	0.10421	0.087368	0.062105	0.08	0.1	0.084211	0.069474	0.076842	0.093684	0.091579	0.084211	0.090526	0.078947	0.046316	0.049474	0.066316	0.058947	0.071579	0.082105	0.075789	0.056842	0.06	0.084211	0.072632
0.032	0.027	0.042	0.075	0.091	0.062	0.031	0.031	0.081	0.119	0.122	0.112	0.094	0.231	0.251	0.094	0.057	0.047	0.028	0.037	0.045	0.044	0.059	0.05	0.032	0.077	0.088	0.094	0.073	0.071	0.086	0.084	0.064	0.068	0.082	0.083	0.085	0.084	0.088	0.063	0.046	0.068	0.059	0.055	0.073	0.077	0.068	0.058	0.072	0.078
0.10308	0.12462	0.086154	0.090769	0.083077	0.047692	0.11231	0.12769	0.089231	0.32	0.31077	0.098462	0.11385	0.11231	0.083077	0.063077	0.063077	0.058462	0.1	0.13692	0.098462	0.070769	0.083077	0.083077	0.073846	0.11231	0.050769	0.066154	0.093846	0.12	0.14308	0.14615	0.12	0.08	0.090769	0.15077	0.14308	0.095385	0.093846	0.092308	0.10154	0.10308	0.089231	0.098462	0.10923	0.10615	0.11692	0.10923	0.096923	0.11077
0.057647	0.1	0.12235	0.078824	0.061176	0.068235	0.038824	0.049412	0.091765	0.061176	0.21765	0.27882	0.13647	0.096471	0.083529	0.072941	0.038824	0.038824	0.035294	0.055294	0.087059	0.084706	0.070588	0.064706	0.051765	0.087059	0.063529	0.048235	0.061176	0.085882	0.088235	0.10353	0.098824	0.056471	0.050588	0.089412	0.11176	0.10588	0.085882	0.070588	0.076471	0.084706	0.090588	0.081176	0.083529	0.095294	0.095294	0.091765	0.083529	0.077647
0.08	0.14308	0.14	0.070769	0.08	0.075385	0.04	0.11692	0.11231	0.10615	0.36308	0.28923	0.033846	0.096923	0.11385	0.075385	0.061538	0.044615	0.055385	0.1	0.10615	0.072308	0.076923	0.093846	0.076923	0.098462	0.049231	0.072308	0.096923	0.11692	0.14615	0.14	0.10615	0.083077	0.098462	0.14308	0.12923	0.08	0.092308	0.096923	0.10154	0.11077	0.092308	0.1	0.11385	0.10462	0.12	0.12	0.098462	0.096923
0.084286	0.071429	0.065714	0.092857	0.074286	0.037143	0.12571	0.12143	0.16143	0.34143	0.21143	0.078571	0.12	0.085714	0.058571	0.051429	0.047143	0.058571	0.10571	0.12571	0.068571	0.057143	0.095714	0.082857	0.057143	0.08	0.078571	0.09	0.098571	0.11714	0.14	0.11286	0.07	0.075714	0.11714	0.14	0.10143	0.071429	0.078571	0.087143	0.091429	0.078571	0.085714	0.1	0.097143	0.10571	0.098571	0.087143	0.081429	0.10571
0.055556	0.093333	0.11667	0.074444	0.056667	0.071111	0.045556	0.051111	0.094444	0.06	0.20556	0.26778	0.13111	0.092222	0.072222	0.071111	0.051111	0.035556	0.031111	0.055556	0.083333	0.066667	0.04	0.061111	0.066667	0.061111	0.047778	0.058889	0.077778	0.086667	0.1	0.085556	0.055556	0.051111	0.073333	0.10778	0.094444	0.062222	0.066667	0.066667	0.077778	0.083333	0.073333	0.082222	0.095556	0.094444	0.087778	0.082222	0.086667	0.093333
0.044706	0.089412	0.08	0.048235	0.063529	0.065882	0.069412	0.062353	0.051765	0.054118	0.06	0.051765	0.028235	0.036471	0.032941	0.13529	0.40824	0.28941	0.069412	0.13176	0.081176	0.036471	0.077647	0.13882	0.097647	0.094118	0.078824	0.090588	0.087059	0.078824	0.076471	0.088235	0.096471	0.098824	0.094118	0.085882	0.089412	0.091765	0.094118	0.098824	0.10824	0.12235	0.12706	0.12706	0.10941	0.072941	0.057647	0.071765	0.068235	0.075294
0.040952	0.047619	0.03619	0.046667	0.060952	0.061905	0.046667	0.038095	0.040952	0.049524	0.04	0.025714	0.028571	0.021905	0.094286	0.37619	0.29143	0.051429	0.088571	0.049524	0.029524	0.053333	0.10952	0.10857	0.040952	0.078095	0.082857	0.081905	0.064762	0.057143	0.066667	0.072381	0.071429	0.069524	0.068571	0.073333	0.07619	0.072381	0.075238	0.080952	0.093333	0.094286	0.10381	0.1019	0.068571	0.052381	0.055238	0.05619	0.061905	0.08
0.023333	0.055556	0.096667	0.071111	0.052222	0.061111	0.07	0.068889	0.042222	0.041111	0.061111	0.061111	0.048889	0.037778	0.025556	0.02	0.23889	0.42333	0.2	0.084444	0.082222	0.02	0.03	0.068889	0.071111	0.072222	0.066667	0.068889	0.077778	0.085556	0.082222	0.085556	0.087778	0.083333	0.085556	0.083333	0.086667	0.088889	0.096667	0.10222	0.10444	0.097778	0.073333	0.057778	0.072222	0.08	0.072222	0.087778	0.088889	0.068889
0.056842	0.070526	0.043158	0.045263	0.056842	0.063158	0.050526	0.035789	0.041053	0.053684	0.041053	0.027368	0.033684	0.022105	0.064211	0.40526	0.36421	0.061053	0.076842	0.042105	0.032632	0.049474	0.10632	0.11579	0.045263	0.069474	0.069474	0.063158	0.063158	0.081053	0.083158	0.081053	0.082105	0.072632	0.08	0.087368	0.087368	0.088421	0.097895	0.10737	0.10316	0.10316	0.093684	0.071579	0.057895	0.061053	0.070526	0.08	0.084211	0.073684
0.052381	0.06	0.040952	0.04381	0.057143	0.06381	0.047619	0.031429	0.035238	0.053333	0.040952	0.022857	0.028571	0.020952	0.059048	0.36571	0.32571	0.051429	0.084762	0.061905	0.04	0.045714	0.093333	0.10571	0.046667	0.082857	0.077143	0.064762	0.057143	0.069524	0.079048	0.073333	0.071429	0.071429	0.068571	0.079048	0.087619	0.085714	0.093333	0.095238	0.090476	0.097143	0.097143	0.075238	0.051429	0.05619	0.060952	0.057143	0.070476	0.073333
0.026667	0.03619	0.064762	0.066667	0.051429	0.080952	0.1981	0.19048	0.13524	0.13905	0.057143	0.018095	0.028571	0.03619	0.050476	0.050476	0.04381	0.06	0.067619	0.086667	0.082857	0.040952	0.050476	0.048571	0.031429	0.072381	0.089524	0.089524	0.07619	0.078095	0.07619	0.055238	0.050476	0.060952	0.05619	0.047619	0.050476	0.055238	0.072381	0.082857	0.060952	0.060952	0.065714	0.050476	0.057143	0.064762	0.073333	0.093333	0.11143	0.090476
0.023158	0.037895	0.066316	0.067368	0.049474	0.10316	0.23053	0.20421	0.14842	0.14421	0.061053	0.026316	0.033684	0.045263	0.058947	0.051579	0.045263	0.061053	0.071579	0.1	0.087368	0.041053	0.054737	0.043158	0.033684	0.073684	0.082105	0.089474	0.085263	0.084211	0.083158	0.069474	0.06	0.067368	0.067368	0.06	0.056842	0.061053	0.073684	0.094737	0.078947	0.065263	0.071579	0.057895	0.063158	0.065263	0.068421	0.086316	0.11368	0.10316
0.037778	0.03	0.06	0.083333	0.055556	0.055556	0.21333	0.23778	0.15	0.14778	0.083333	0.055556	0.066667	0.057778	0.055556	0.057778	0.044444	0.056667	0.056667	0.08	0.092222	0.035556	0.044444	0.064444	0.041111	0.083333	0.061111	0.082222	0.094444	0.093333	0.086667	0.087778	0.086667	0.071111	0.06	0.066667	0.067778	0.068889	0.061111	0.056667	0.081111	0.1	0.068889	0.065556	0.076667	0.055556	0.065556	0.071111	0.08	0.1
0.031111	0.035556	0.064444	0.077778	0.054444	0.066667	0.21889	0.23333	0.15778	0.16778	0.082222	0.031111	0.04	0.035556	0.05	0.062222	0.046667	0.06	0.071111	0.098889	0.10111	0.047778	0.061111	0.06	0.034444	0.071111	0.078889	0.10111	0.097778	0.09	0.092222	0.082222	0.064444	0.067778	0.076667	0.068889	0.061111	0.062222	0.067778	0.09	0.094444	0.07	0.068889	0.061111	0.063333	0.074444	0.07	0.087778	0.10889	0.097778
0.043	0.063	0.069	0.049	0.095	0.204	0.197	0.135	0.124	0.07	0.034	0.034	0.028	0.05	0.054	0.04	0.057	0.061	0.07	0.064	0.034	0.051	0.047	0.019	0.042	0.071	0.073	0.09	0.093	0.088	0.082	0.08	0.072	0.055	0.056	0.06	0.056	0.048	0.051	0.064	0.087	0.071	0.059	0.069	0.057	0.061	0.055	0.058	0.081	0.089
0.052941	0.069412	0.067059	0.052941	0.062353	0.098824	0.085882	0.04	0.062353	0.061176	0.029412	0.023529	0.023529	0.025882	0.095294	0.20824	0.16824	0.20588	0.19059	0.04	0.037647	0.048235	0.042353	0.063529	0.083529	0.097647	0.10353	0.092941	0.070588	0.08	0.091765	0.077647	0.063529	0.042353	0.037647	0.055294	0.072941	0.084706	0.10235	0.095294	0.062353	0.062353	0.082353	0.095294	0.087059	0.078824	0.076471	0.084706	0.087059	0.084706
0.057778	0.053333	0.055556	0.054444	0.062222	0.066667	0.077778	0.056667	0.047778	0.064444	0.053333	0.035556	0.026667	0.026667	0.023333	0.15444	0.17222	0.12889	0.23	0.13556	0.027778	0.042222	0.037778	0.041111	0.063333	0.072222	0.084444	0.10222	0.097778	0.067778	0.053333	0.077778	0.084444	0.063333	0.04	0.043333	0.06	0.057778	0.075556	0.091111	0.09	0.07	0.055556	0.062222	0.088889	0.088889	0.081111	0.077778	0.066667	0.076667
0.05625	0.07375	0.06375	0.04875	0.065	0.0975	0.065	0.04125	0.0775	0.06375	0.0275	0.02375	0.025	0.02875	0.14875	0.21875	0.15875	0.235	0.17375	0.0325	0.0525	0.05125	0.04625	0.08	0.09875	0.09875	0.09625	0.095	0.0825	0.08375	0.0925	0.08375	0.07125	0.05	0.04625	0.07125	0.08375	0.085	0.11	0.10875	0.07	0.06375	0.0825	0.09875	0.0775	0.07	0.08875	0.09625	0.08875	0.08375
0.07875	0.085	0.07125	0.065	0.06375	0.06125	0.0775	0.1025	0.06625	0.05625	0.08	0.0625	0.0425	0.03625	0.03125	0.025	0.155	0.20875	0.16	0.2575	0.17375	0.03375	0.04875	0.055	0.075	0.09375	0.1275	0.12	0.10125	0.09125	0.08875	0.08875	0.08625	0.06125	0.04875	0.07	0.095	0.1025	0.11	0.105	0.07375	0.0525	0.05375	0.07875	0.09375	0.0925	0.0975	0.0925	0.1025	0.105
0.062353	0.069412	0.054118	0.062353	0.064706	0.048235	0.051765	0.087059	0.081176	0.043529	0.064706	0.064706	0.04	0.038824	0.029412	0.025882	0.10235	0.21882	0.17647	0.23294	0.21765	0.042353	0.036471	0.049412	0.061176	0.096471	0.11765	0.10118	0.088235	0.082353	0.087059	0.087059	0.075294	0.056471	0.047059	0.06	0.077647	0.084706	0.088235	0.088235	0.076471	0.064706	0.063529	0.08	0.084706	0.084706	0.092941	0.087059	0.092941	0.091765
0.06625	0.0425	0.05	0.05625	0.06875	0.07	0.03875	0.0875	0.1225	0.115	0.20125	0.2075	0.145	0.32375	0.32	0.07125	0.02	0.05875	0.09	0.08875	0.08875	0.0775	0.04875	0.04375	0.05625	0.11375	0.09625	0.09125	0.09875	0.11875	0.1125	0.09125	0.10125	0.105	0.1	0.12625	0.13875	0.13	0.1075	0.07625	0.07375	0.0775	0.085	0.08375	0.09375	0.10625	0.10125	0.09625	0.085	0.0925
0.05625	0.02375	0.03375	0.05375	0.0775	0.06625	0.06375	0.10125	0.1125	0.15375	0.1825	0.19875	0.23	0.3825	0.2925	0.025	0.02375	0.07875	0.1025	0.08875	0.08625	0.06875	0.04875	0.0625	0.05625	0.0975	0.09	0.1225	0.12125	0.10125	0.09375	0.1025	0.0925	0.1	0.1275	0.1125	0.0775	0.0675	0.075	0.08375	0.085	0.09375	0.095	0.09375	0.0925	0.10125	0.11125	0.09875	0.10625	0.11
0.05875	0.0425	0.04125	0.05125	0.06875	0.06625	0.05	0.09625	0.12625	0.15125	0.20875	0.21375	0.1975	0.36	0.29375	0.0375	0.02875	0.08125	0.1	0.0775	0.08125	0.07125	0.045	0.0575	0.05625	0.11	0.09	0.09375	0.10125	0.105	0.105	0.0975	0.09875	0.095	0.0975	0.1325	0.13125	0.1075	0.08875	0.0775	0.0875	0.0875	0.0975	0.09125	0.10125	0.1125	0.1025	0.10125	0.09	0.1
0.074286	0.055714	0.057143	0.068571	0.087143	0.057143	0.092857	0.14143	0.13	0.20857	0.24143	0.30714	0.40857	0.38429	0.18143	0.0014286	0.037143	0.10714	0.10714	0.097143	0.094286	0.055714	0.06	0.085714	0.074286	0.13	0.10714	0.10143	0.11429	0.12429	0.11571	0.1	0.11	0.12143	0.11571	0.13857	0.15143	0.13714	0.11857	0.095714	0.092857	0.092857	0.11143	0.11143	0.10857	0.12286	0.12714	0.12714	0.10857	0.10714
0.064	0.024	0.045333	0.064	0.082667	0.066667	0.076	0.112	0.11733	0.17333	0.18533	0.216	0.28533	0.40533	0.276	0.013333	0.030667	0.089333	0.10133	0.097333	0.10267	0.076	0.058667	0.076	0.066667	0.10667	0.10667	0.12933	0.12267	0.10267	0.10267	0.108	0.097333	0.104	0.13333	0.13333	0.1	0.082667	0.084	0.090667	0.096	0.1	0.097333	0.1	0.104	0.10933	0.116	0.10933	0.11733	0.11467
0.06125	0.07125	0.05125	0.04375	0.0425	0.05	0.04125	0.0125	0.11875	0.3225	0.3	0.1375	0.085	0.09375	0.0725	0.07625	0.08	0.02875	0.0225	0.05625	0.075	0.05625	0.0525	0.085	0.0775	0.09	0.0875	0.06375	0.04	0.05375	0.09125	0.10375	0.09625	0.08375	0.08	0.08875	0.1075	0.12	0.1425	0.1325	0.0875	0.0775	0.0725	0.06375	0.08125	0.0875	0.0725	0.075	0.07125	0.0575
0.055556	0.037778	0.048889	0.046667	0.041111	0.038889	0.016667	0.061111	0.31444	0.33667	0.11556	0.076667	0.086667	0.076667	0.073333	0.073333	0.038889	0.024444	0.043333	0.064444	0.056667	0.046667	0.071111	0.081111	0.056667	0.086667	0.087778	0.076667	0.055556	0.048889	0.072222	0.096667	0.098889	0.087778	0.077778	0.078889	0.081111	0.075556	0.1	0.10667	0.081111	0.077778	0.074444	0.063333	0.07	0.078889	0.076667	0.077778	0.077778	0.057778
0.045263	0.030526	0.04	0.04	0.037895	0.031579	0.0094737	0.10632	0.30421	0.24526	0.08	0.08	0.094737	0.073684	0.051579	0.043158	0.022105	0.02	0.041053	0.057895	0.051579	0.049474	0.08	0.089474	0.065263	0.069474	0.057895	0.042105	0.055789	0.085263	0.093684	0.081053	0.071579	0.073684	0.074737	0.092632	0.10316	0.092632	0.076842	0.063158	0.065263	0.06	0.057895	0.069474	0.066316	0.065263	0.076842	0.064211	0.053684	0.063158
0.051765	0.050588	0.042353	0.037647	0.036471	0.048235	0.030588	0.0058824	0.20941	0.34235	0.18353	0.083529	0.072941	0.088235	0.075294	0.074118	0.064706	0.017647	0.025882	0.067059	0.067059	0.038824	0.064706	0.10941	0.076471	0.089412	0.075294	0.056471	0.041176	0.061176	0.090588	0.092941	0.084706	0.08	0.089412	0.089412	0.10118	0.12235	0.12235	0.098824	0.071765	0.068235	0.063529	0.058824	0.078824	0.081176	0.072941	0.072941	0.055294	0.054118
0.045556	0.031111	0.043333	0.042222	0.04	0.035556	0.013333	0.10889	0.34111	0.29	0.093333	0.078889	0.084444	0.068889	0.065556	0.055556	0.021111	0.023333	0.048889	0.057778	0.044444	0.057778	0.084444	0.078889	0.065556	0.085556	0.073333	0.074444	0.058889	0.045556	0.06	0.092222	0.10333	0.091111	0.084444	0.083333	0.081111	0.077778	0.098889	0.10444	0.076667	0.063333	0.066667	0.062222	0.062222	0.077778	0.07	0.066667	0.078889	0.063333
[truncated: 51 more columns]
